# Supplementary material
Source: PubMed Central journal article supplement (PMC9127657)
Supplement: NIHMS1799873-supplement-Supplementary_1.pdf [file NIHMS1799873-supplement-Supplementary_1.pdf]

# ==== Shimadzu LCsolution 分析报告 ====

采集人 : Admin  
 样品名称 : i-10a-2  
 样品 ID : i-10a-2  
 样品瓶# : 1  
 进样体积 : 20 uL  
 数据文件名 : i-10a-03.lcd  
 方法文件名 : yn-w5-50%.lcm  
 批处理文件名 :  
 报告文件名 : Default.lcr  
 数据采集 : 2021/9/7 11:24:37  
 数据处理 : 2021/9/7 11:34:19

## <色谱图>

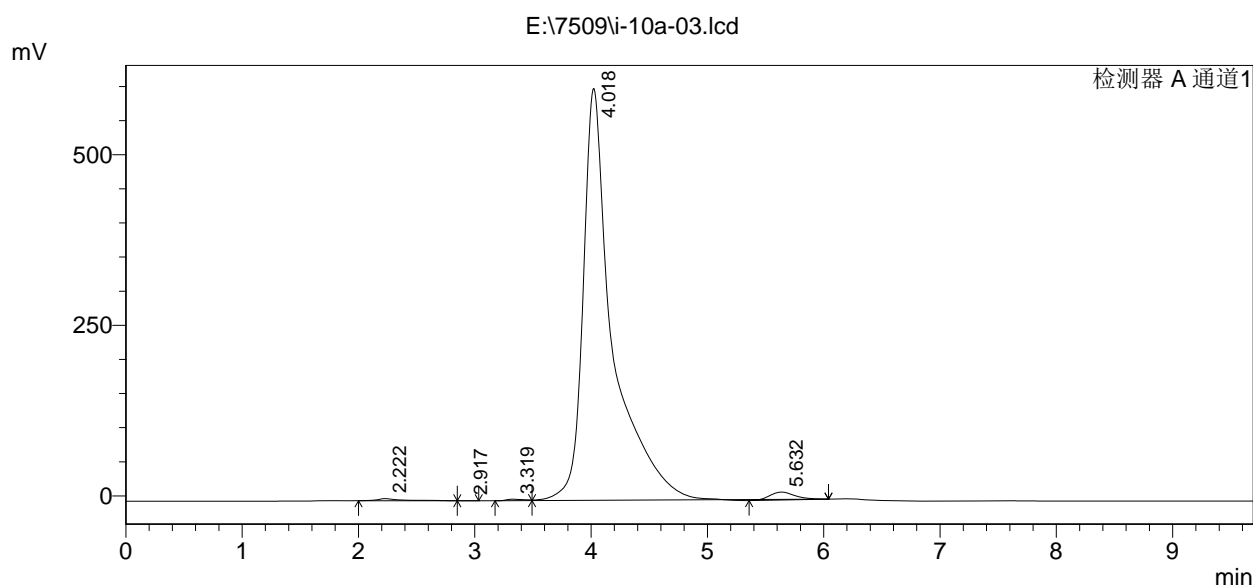

1 检测器 A 通道1/254nm

峰表

检测器 A Ch1 254nm

| 峰# | 保留时间  | 面积       | 高度     | 面积 %    |
|----|-------|----------|--------|---------|
| 1  | 2.222 | 45432    | 3127   | 0.419   |
| 2  | 2.917 | 481      | 72     | 0.004   |
| 3  | 3.319 | 24466    | 2227   | 0.225   |
| 4  | 4.018 | 10607796 | 603585 | 97.721  |
| 5  | 5.632 | 176970   | 11625  | 1.630   |
| 总计 |       | 10855145 | 620636 | 100.000 |

# ==== Shimadzu LCsolution 分析报告 ====

采集人 : Admin  
 样品名称 : i-10b  
 样品 ID : i-10b  
 样品瓶# : 1  
 进样体积 : 20 uL  
 数据文件名 : i-10b01.lcd  
 方法文件名 : yn-w5-50%.lcm  
 批处理文件名 :  
 报告文件名 : Default.lcr  
 数据采集 : 2021/9/7 10:33:40  
 数据处理 : 2021/9/7 10:39:58

## <色谱图>

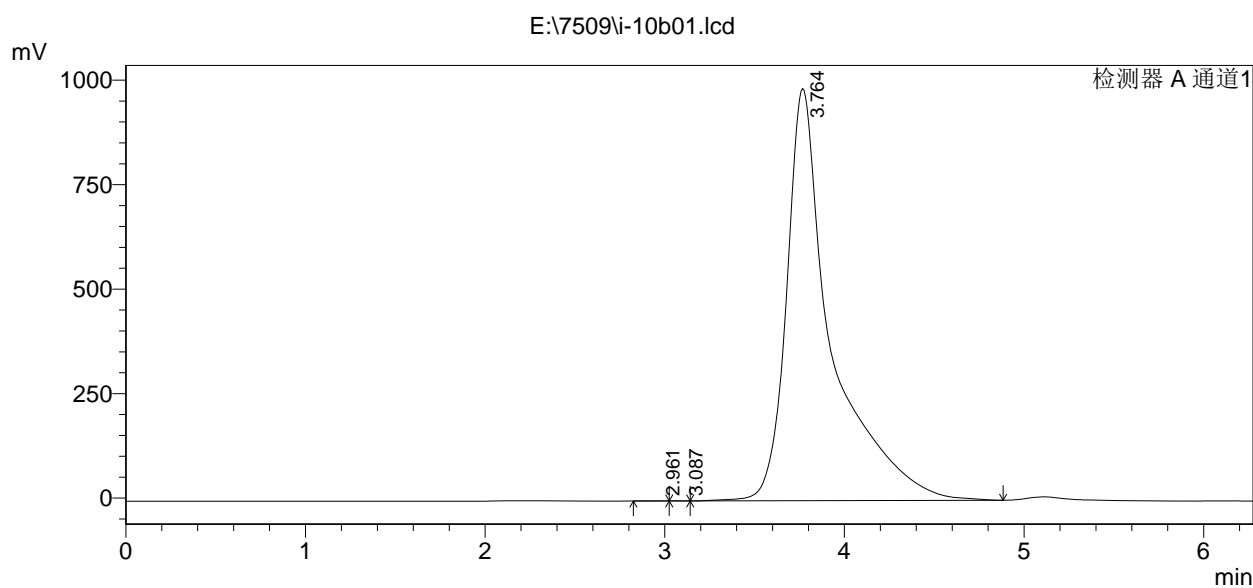

峰表

检测器 A Ch1 254nm

| 峰# | 保留时间  | 面积       | 高度     | 面积 %    |
|----|-------|----------|--------|---------|
| 1  | 2.961 | 1487     | 205    | 0.009   |
| 2  | 3.087 | 547      | 90     | 0.003   |
| 3  | 3.764 | 17147165 | 986421 | 99.988  |
| 总计 |       | 17149198 | 986716 | 100.000 |

# ==== Shimadzu LCsolution 分析报告 ====

采集人 : Admin  
 样品名称 : i-10c  
 样品 ID : i-10c  
 样品瓶# : 1  
 进样体积 : 20 uL  
 数据文件名 : i-10c01.lcd  
 方法文件名 : yn-w5-50%.lcm  
 批处理文件名 :  
 报告文件名 : Default.lcr  
 数据采集 : 2021/9/7 10:48:56  
 数据处理 : 2021/9/7 10:59:45

## <色谱图>

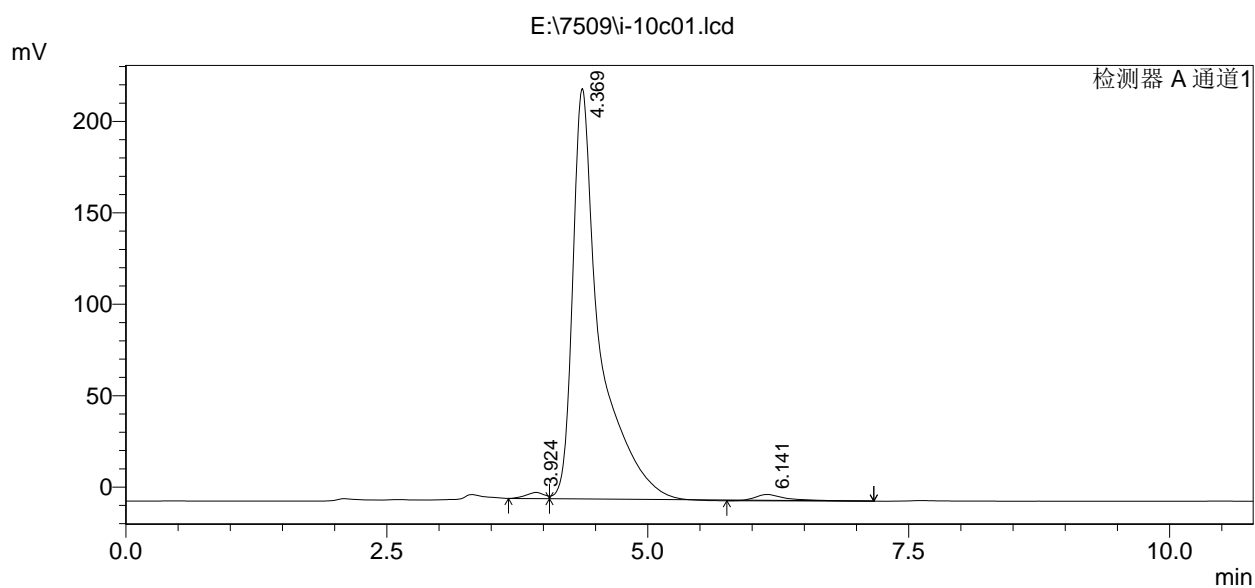

峰表

检测器 A Ch1 254nm

| 峰# | 保留时间  | 面积      | 高度     | 面积 %    |
|----|-------|---------|--------|---------|
| 1  | 3.924 | 41779   | 3405   | 1.011   |
| 2  | 4.369 | 4017905 | 224516 | 97.198  |
| 3  | 6.141 | 74066   | 3482   | 1.792   |
| 总计 |       | 4133750 | 231403 | 100.000 |

# ==== Shimadzu LCsolution 分析报告 ====

采集人 : Admin  
 样品名称 : i-10d  
 样品 ID : i-10d  
 样品瓶# : 1  
 进样体积 : 20 uL  
 数据文件名 : i-10d01.lcd  
 方法文件名 : yn-w5-50%.lcm  
 批处理文件名 :  
 报告文件名 : Default.lcr  
 数据采集 : 2021/9/7 11:02:52  
 数据处理 : 2021/9/7 11:10:04

## <色谱图>

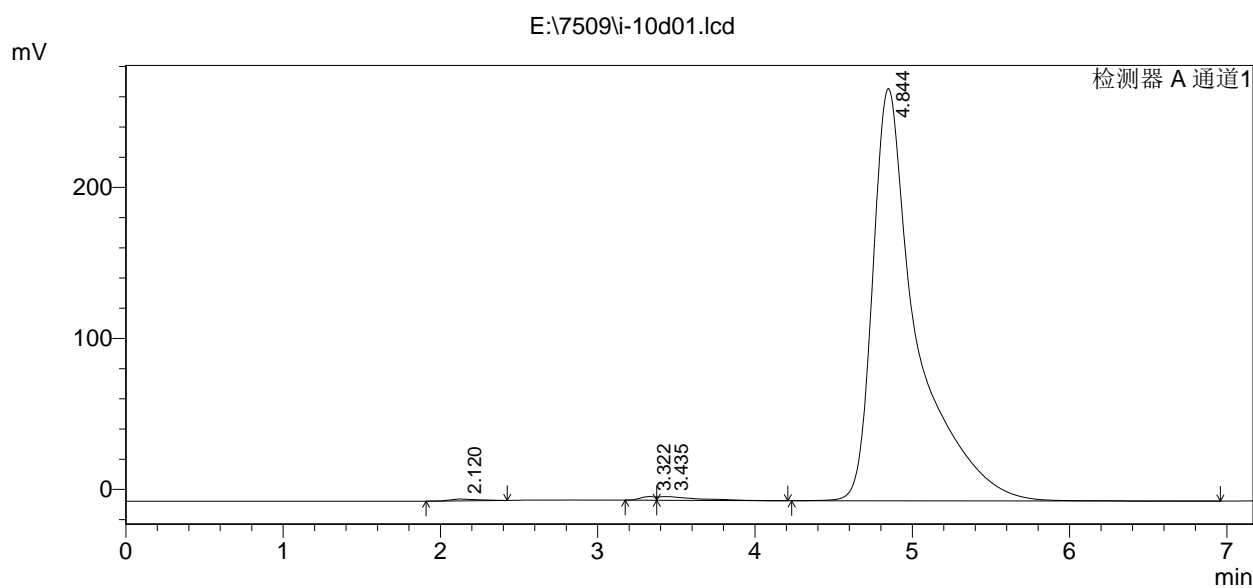

1 检测器 A 通道1/254nm

峰表

检测器 A Ch1 254nm

| 峰# | 保留时间  | 面积      | 高度     | 面积 %    |
|----|-------|---------|--------|---------|
| 1  | 2.120 | 14791   | 1218   | 0.275   |
| 2  | 3.322 | 16260   | 2341   | 0.302   |
| 3  | 3.435 | 40414   | 2406   | 0.750   |
| 4  | 4.844 | 5315633 | 273088 | 98.673  |
| 总计 |       | 5387098 | 279052 | 100.000 |

# ==== Shimadzu LCsolution 分析报告 ====

采集人 : Admin  
 样品名称 : i-10e  
 样品 ID : i-10e  
 样品瓶# : 1  
 进样体积 : 20 uL  
 数据文件名 : i-10e01.lcd  
 方法文件名 : yn-w5-50%.lcm  
 批处理文件名 :  
 报告文件名 : Default.lcr  
 数据采集 : 2021/9/7 11:13:49  
 数据处理 : 2021/9/7 11:22:31

## <色谱图>

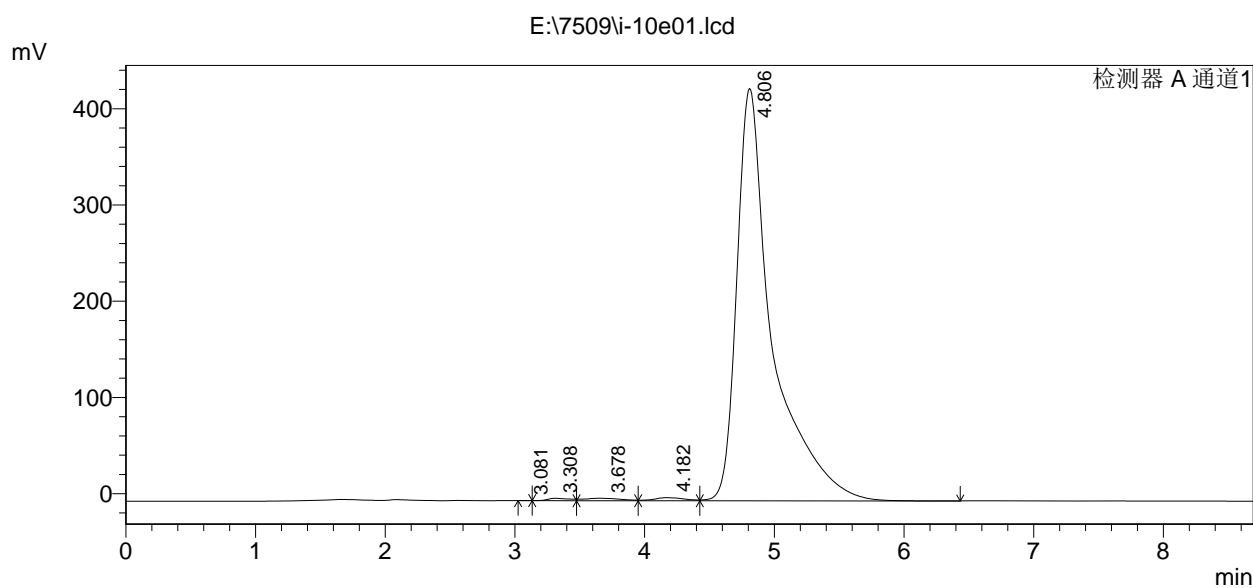

1 检测器 A 通道1/254nm

峰表

检测器 A Ch1 254nm

| 峰# | 保留时间  | 面积      | 高度     | 面积 %    |
|----|-------|---------|--------|---------|
| 1  | 3.081 | 117     | 28     | 0.001   |
| 2  | 3.308 | 28849   | 2445   | 0.349   |
| 3  | 3.678 | 50372   | 2778   | 0.609   |
| 4  | 4.182 | 54131   | 3455   | 0.654   |
| 5  | 4.806 | 8140346 | 428559 | 98.387  |
| 总计 |       | 8273816 | 437264 | 100.000 |

# ==== Shimadzu LCsolution 分析报告 ====

采集人 : Admin  
 样品名称 : II-13a2  
 样品 ID : II-13a2  
 样品瓶# : 1  
 进样体积 : 20 uL  
 数据文件名 : ii-13a03.lcd  
 方法文件名 : yn-w5-50%.lcm  
 批处理文件名 :  
 报告文件名 : Default.lcr  
 数据采集 : 2021/9/7 12:15:06  
 数据处理 : 2021/9/7 12:22:11

## <色谱图>

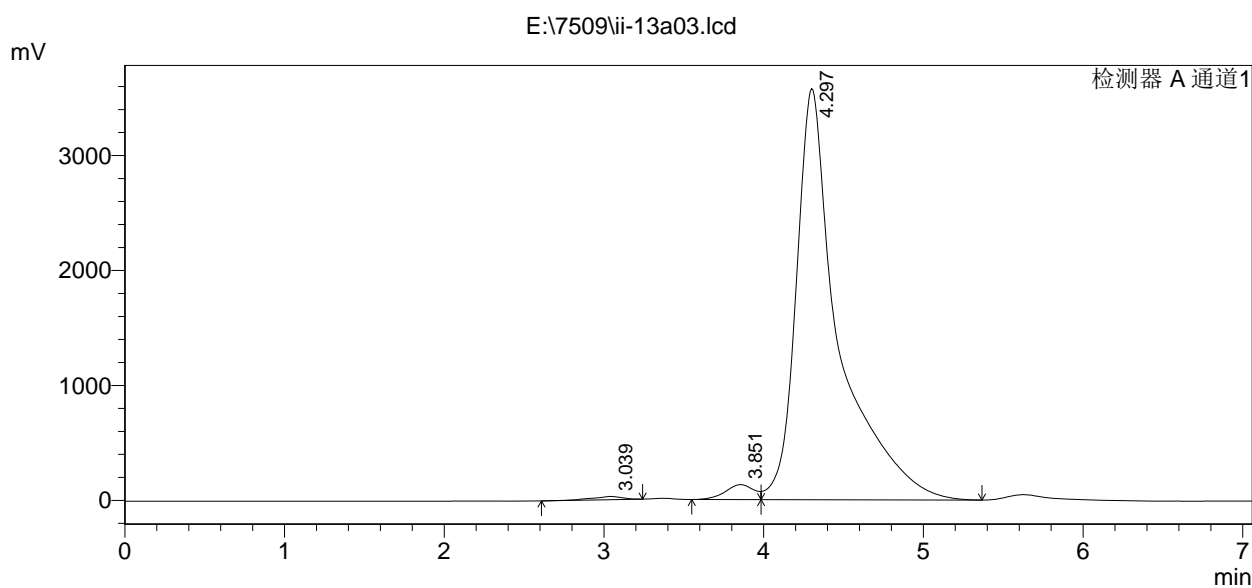

峰表

检测器 A Ch1 254nm

| 峰# | 保留时间  | 面积       | 高度      | 面积 %    |
|----|-------|----------|---------|---------|
| 1  | 3.039 | 375751   | 28987   | 0.551   |
| 2  | 3.851 | 1639929  | 130358  | 2.405   |
| 3  | 4.297 | 66171171 | 3578225 | 97.044  |
| 总计 |       | 68186851 | 3737570 | 100.000 |

# ==== Shimadzu LCsolution 分析报告 ====

采集人 : Admin  
 样品名称 : II-13b  
 样品 ID : II-13b  
 样品瓶# : 1  
 进样体积 : 20 uL  
 数据文件名 : II-13b01.lcd  
 方法文件名 : yn-w5-50%.lcm  
 批处理文件名 :  
 报告文件名 : Default.lcr  
 数据采集 : 2021/9/7 12:28:08  
 数据处理 : 2021/9/7 12:36:13

## <色谱图>

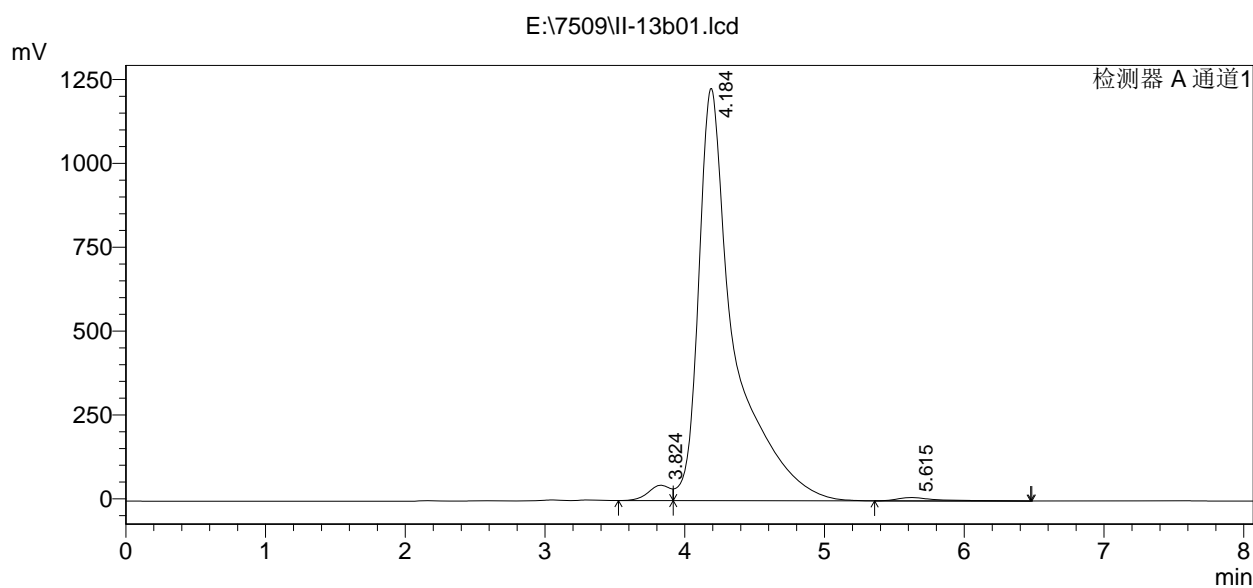

1 检测器 A 通道1/254nm

峰表

检测器 A Ch1 254nm

| 峰# | 保留时间  | 面积       | 高度      | 面积 %    |
|----|-------|----------|---------|---------|
| 1  | 3.824 | 506329   | 45916   | 2.249   |
| 2  | 4.184 | 21813365 | 1228972 | 96.884  |
| 3  | 5.615 | 195344   | 10216   | 0.868   |
| 总计 |       | 22515039 | 1285103 | 100.000 |

# ==== Shimadzu LCsolution 分析报告 ====

采集人 : Admin  
 样品名称 : II-13C  
 样品 ID : II-13C  
 样品瓶# : 1  
 进样体积 : 20 uL  
 数据文件名 : II-13C01.lcd  
 方法文件名 : yn-w5-50%.lcm  
 批处理文件名 :  
 报告文件名 : Default.lcr  
 数据采集 : 2021/9/7 20:15:55  
 数据处理 : 2021/9/7 20:26:16

## <色谱图>

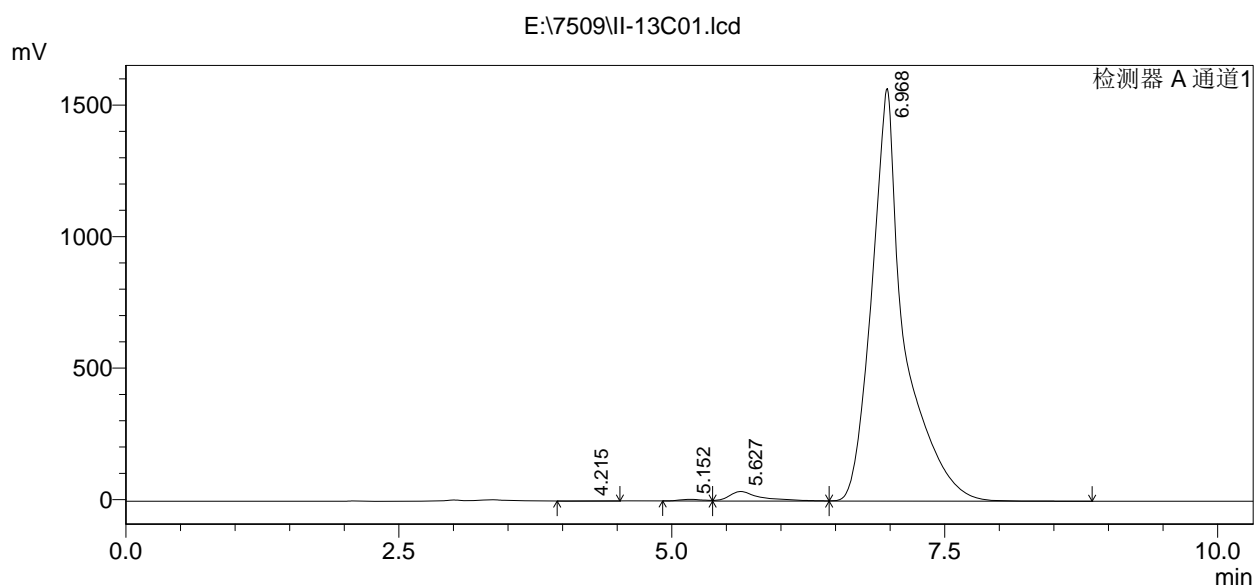

1 检测器 A 通道1/254nm

## 峰表

检测器 A Ch1 254nm

| 峰# | 保留时间  | 面积       | 高度      | 面积 %    |
|----|-------|----------|---------|---------|
| 1  | 4.215 | 10050    | 663     | 0.030   |
| 2  | 5.152 | 92983    | 6197    | 0.279   |
| 3  | 5.627 | 720740   | 36184   | 2.161   |
| 4  | 6.968 | 32523447 | 1568861 | 97.530  |
| 总计 |       | 33347221 | 1611905 | 100.000 |



# ==== Shimadzu LCsolution 分析报告 ====

采集人 : Admin  
 样品名称 : II-13d  
 样品 ID : II-13d  
 样品瓶# : 1  
 进样体积 : 20 uL  
 数据文件名 : ii-16d01.lcd  
 方法文件名 : yn-w5-50%.lcm  
 批处理文件名 :  
 报告文件名 : Default.lcr  
 数据采集 : 2021/9/7 12:40:06  
 数据处理 : 2021/9/7 12:48:51

## <色谱图>

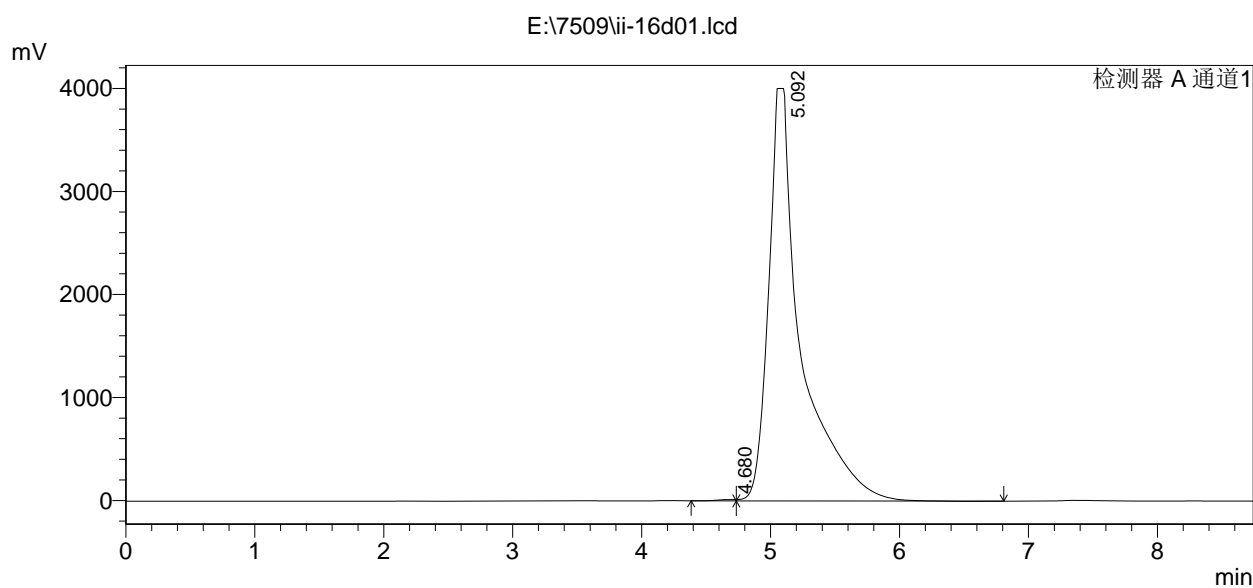

峰表

检测器 A Ch1 254nm

| 峰# | 保留时间  | 面积       | 高度      | 面积 %    |
|----|-------|----------|---------|---------|
| 1  | 4.680 | 127935   | 13727   | 0.184   |
| 2  | 5.092 | 69273878 | 4003521 | 99.816  |
| 总计 |       | 69401813 | 4017247 | 100.000 |

# ==== Shimadzu LCsolution 分析报告 ====

采集人 : Admin  
 样品名称 : II-13e  
 样品 ID : II-13e  
 样品瓶# : 1  
 进样体积 : 20 uL  
 数据文件名 : ii-13e01.lcd  
 方法文件名 : yn-w5-50%.lcm  
 批处理文件名 :  
 报告文件名 : Default.lcr  
 数据采集 : 2021/9/7 12:51:35  
 数据处理 : 2021/9/7 13:00:27

## <色谱图>

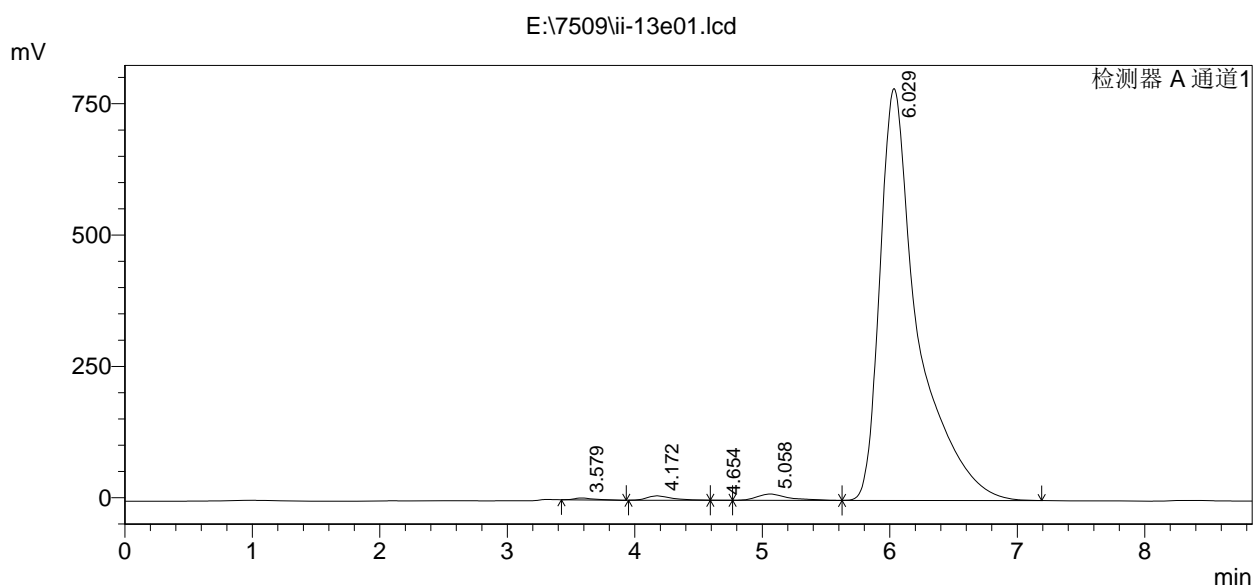

1 检测器 A 通道1/254nm

峰表

检测器 A Ch1 254nm

| 峰# | 保留时间  | 面积       | 高度     | 面积 %    |
|----|-------|----------|--------|---------|
| 1  | 3.579 | 39431    | 3712   | 0.238   |
| 2  | 4.172 | 116991   | 8573   | 0.705   |
| 3  | 4.654 | 2351     | 305    | 0.014   |
| 4  | 5.058 | 206222   | 12110  | 1.242   |
| 5  | 6.029 | 16233545 | 784267 | 97.801  |
| 总计 |       | 16598540 | 808966 | 100.000 |

# ==== Shimadzu LCsolution 分析报告 ====

采集人 : Admin  
 样品名称 : II-13f  
 样品 ID : II-13f  
 样品瓶# : 1  
 进样体积 : 20 uL  
 数据文件名 : ii-13f02.lcd  
 方法文件名 : yn-w5-50%.lcm  
 批处理文件名 :  
 报告文件名 : Default.lcr  
 数据采集 : 2021/9/7 13:16:22  
 数据处理 : 2021/9/7 13:23:47

## <色谱图>

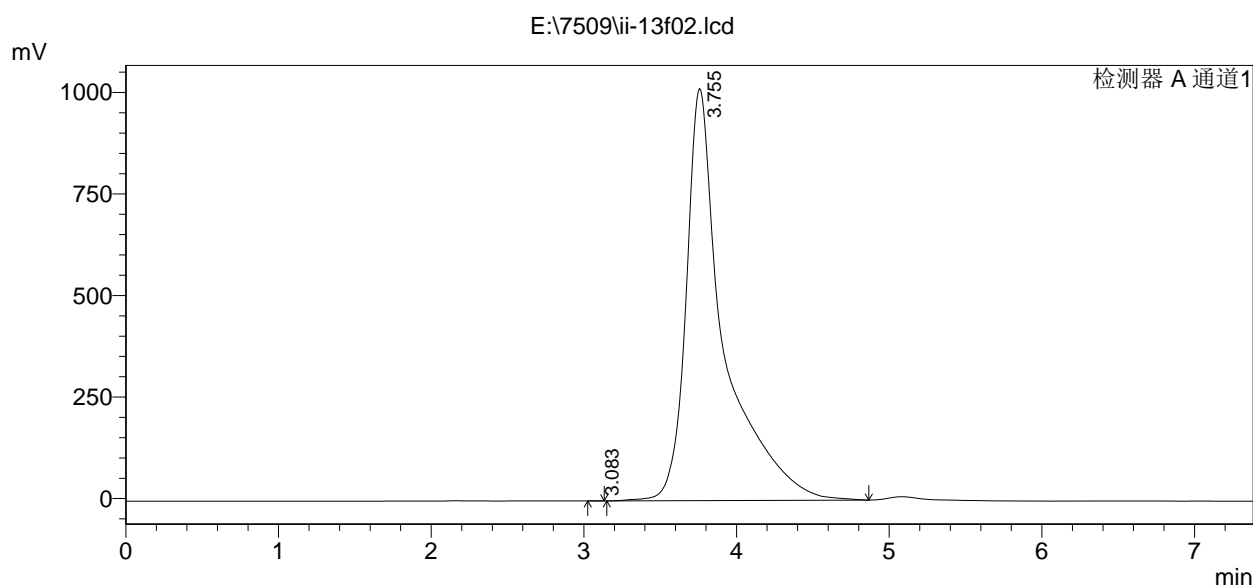

峰表

检测器 A Ch1 254nm

| 峰# | 保留时间  | 面积       | 高度      | 面积 %    |
|----|-------|----------|---------|---------|
| 1  | 3.083 | 110      | 30      | 0.001   |
| 2  | 3.755 | 17470522 | 1014911 | 99.999  |
| 总计 |       | 17470632 | 1014941 | 100.000 |

# ==== Shimadzu LCsolution 分析报告 ====

采集人 : Admin  
 样品名称 : II-13g  
 样品 ID : II-13g  
 样品瓶# : 1  
 进样体积 : 20 uL  
 数据文件名 : ii-13g01.lcd  
 方法文件名 : yn-w5-50%.lcm  
 批处理文件名 :  
 报告文件名 : Default.lcr  
 数据采集 : 2021/9/7 13:26:23  
 数据处理 : 2021/9/7 13:34:20

## <色谱图>

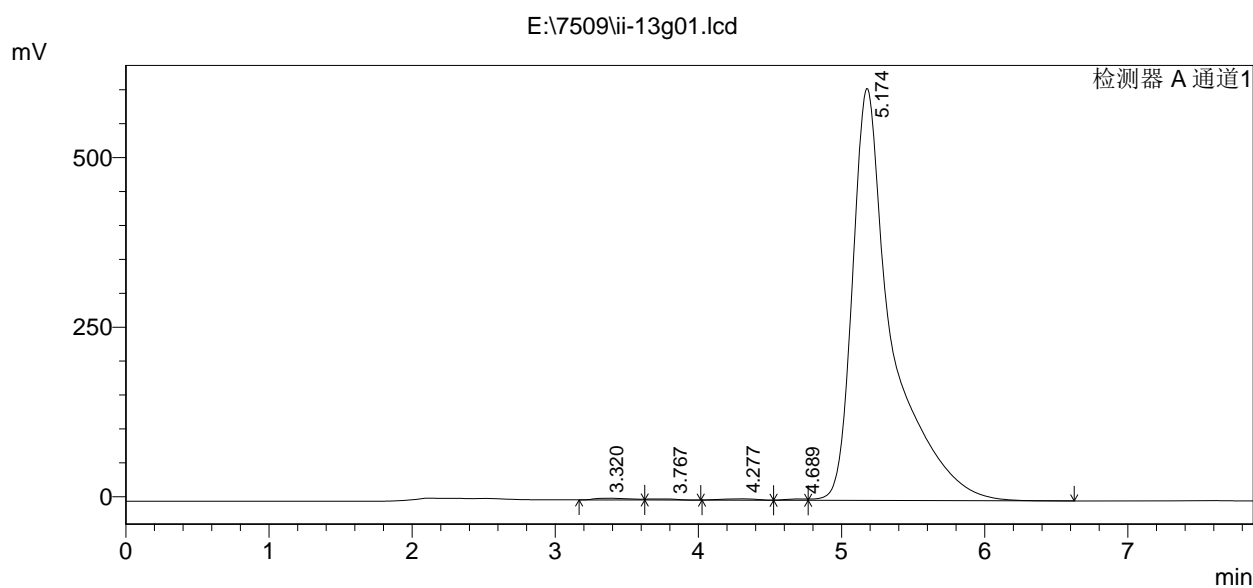

1 检测器 A 通道1/254nm

峰表

检测器 A Ch1 254nm

| 峰# | 保留时间  | 面积       | 高度     | 面积 %    |
|----|-------|----------|--------|---------|
| 1  | 3.320 | 45060    | 2627   | 0.383   |
| 2  | 3.767 | 22658    | 1585   | 0.192   |
| 3  | 4.277 | 35863    | 2310   | 0.305   |
| 4  | 4.689 | 21124    | 2117   | 0.179   |
| 5  | 5.174 | 11652761 | 607405 | 98.941  |
| 总计 |       | 11777466 | 616042 | 100.000 |

# ==== Shimadzu LCsolution 分析报告 ====

采集人 : Admin  
 样品名称 : III-16a  
 样品 ID : III-16a  
 样品瓶# : 1  
 进样体积 : 20 uL  
 数据文件名 : iii-16a01.lcd  
 方法文件名 : yn-w5-50%.lcm  
 批处理文件名 :  
 报告文件名 : Default.lcr  
 数据采集 : 2021/9/7 13:36:54  
 数据处理 : 2021/9/7 13:46:13

## <色谱图>

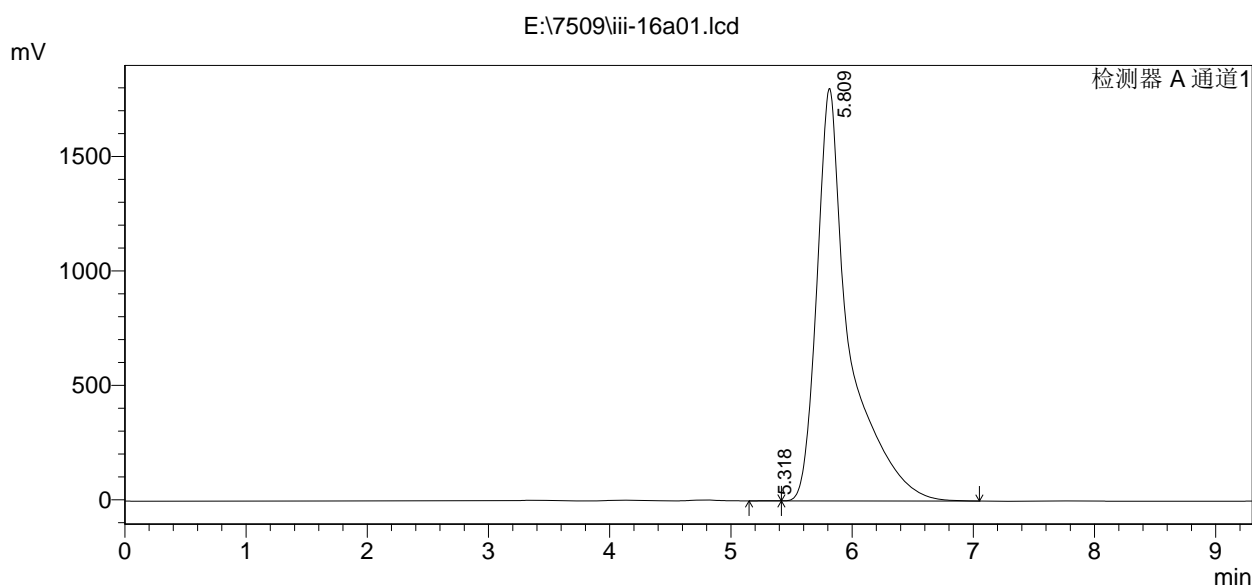

峰表

检测器 A Ch1 254nm

| 峰# | 保留时间  | 面积       | 高度      | 面积 %    |
|----|-------|----------|---------|---------|
| 1  | 5.318 | 5585     | 601     | 0.017   |
| 2  | 5.809 | 33448803 | 1802315 | 99.983  |
| 总计 |       | 33454388 | 1802916 | 100.000 |

# ==== Shimadzu LCsolution 分析报告 ====

采集人 : Admin  
 样品名称 : III-16b  
 样品 ID : III-16b  
 样品瓶# : 1  
 进样体积 : 20 uL  
 数据文件名 : iii-16b01.lcd  
 方法文件名 : yn-w5-50%.lcm  
 批处理文件名 :  
 报告文件名 : Default.lcr  
 数据采集 : 2021/9/7 13:48:25  
 数据处理 : 2021/9/7 13:58:26

## <色谱图>

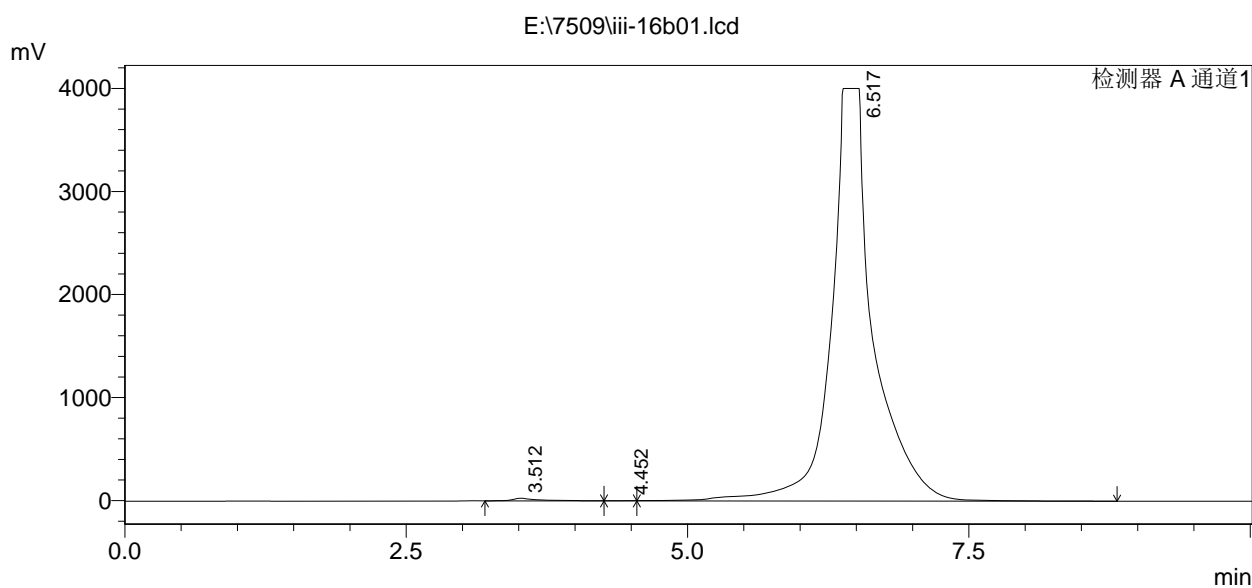

1 检测器 A 通道1/254nm

峰表

检测器 A Ch1 254nm

| 峰# | 保留时间  | 面积        | 高度      | 面积 %    |
|----|-------|-----------|---------|---------|
| 1  | 3.512 | 450285    | 26390   | 0.430   |
| 2  | 4.452 | 27941     | 2167    | 0.027   |
| 3  | 6.517 | 104149736 | 4004461 | 99.543  |
| 总计 |       | 104627962 | 4033018 | 100.000 |

# ==== Shimadzu LCsolution 分析报告 ====

采集人 : Admin  
 样品名称 : III-16c  
 样品 ID : III-16c  
 样品瓶# : 1  
 进样体积 : 20 uL  
 数据文件名 : iii-16c02.lcd  
 方法文件名 : yn-w5-50%.lcm  
 批处理文件名 :  
 报告文件名 : Default.lcr  
 数据采集 : 2021/9/7 14:11:57  
 数据处理 : 2021/9/7 14:19:25

## <色谱图>

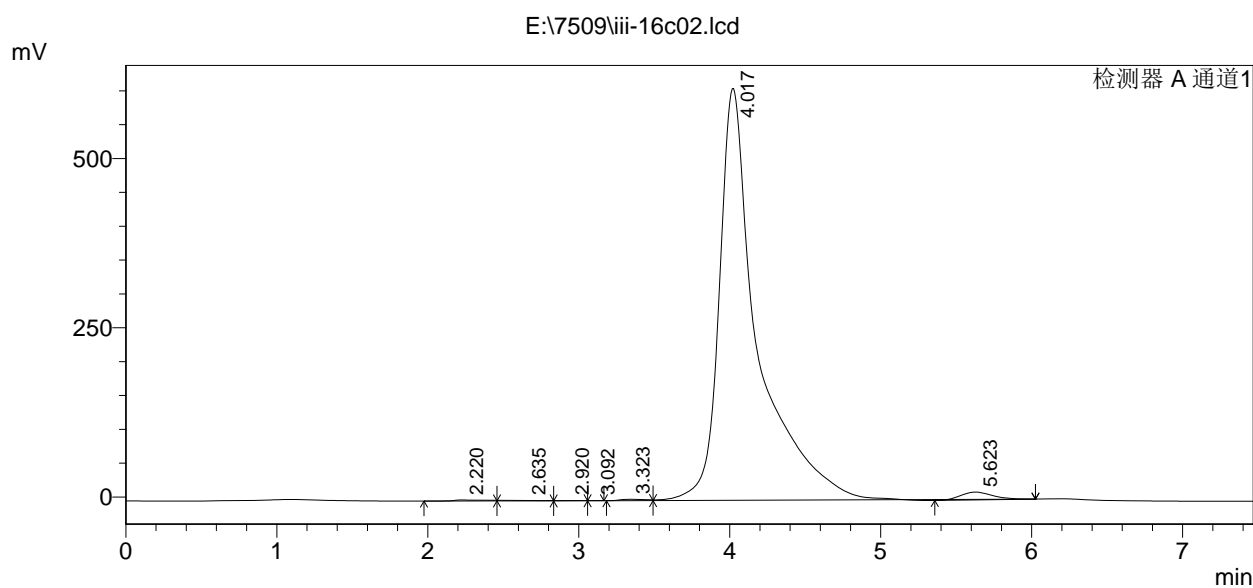

1 检测器 A 通道1/254nm

峰表

检测器 A Ch1 254nm

| 峰# | 保留时间  | 面积       | 高度     | 面积 %    |
|----|-------|----------|--------|---------|
| 1  | 2.220 | 21552    | 1651   | 0.197   |
| 2  | 2.635 | 16244    | 981    | 0.148   |
| 3  | 2.920 | 3155     | 280    | 0.029   |
| 4  | 3.092 | 479      | 111    | 0.004   |
| 5  | 3.323 | 24352    | 2232   | 0.222   |
| 6  | 4.017 | 10716730 | 608318 | 97.801  |
| 7  | 5.623 | 175173   | 11620  | 1.599   |
| 总计 |       | 10957686 | 625193 | 100.000 |

# ==== Shimadzu LCsolution 分析报告 ====

采集人 : Admin  
 样品名称 : III-16d  
 样品 ID : III-16d  
 样品瓶# : 1  
 进样体积 : 20 uL  
 数据文件名 : iii-16d01.lcd  
 方法文件名 : yn-w5-50%.lcm  
 批处理文件名 :  
 报告文件名 : Default.lcr  
 数据采集 : 2021/9/7 14:21:13  
 数据处理 : 2021/9/7 14:36:42

## <色谱图>

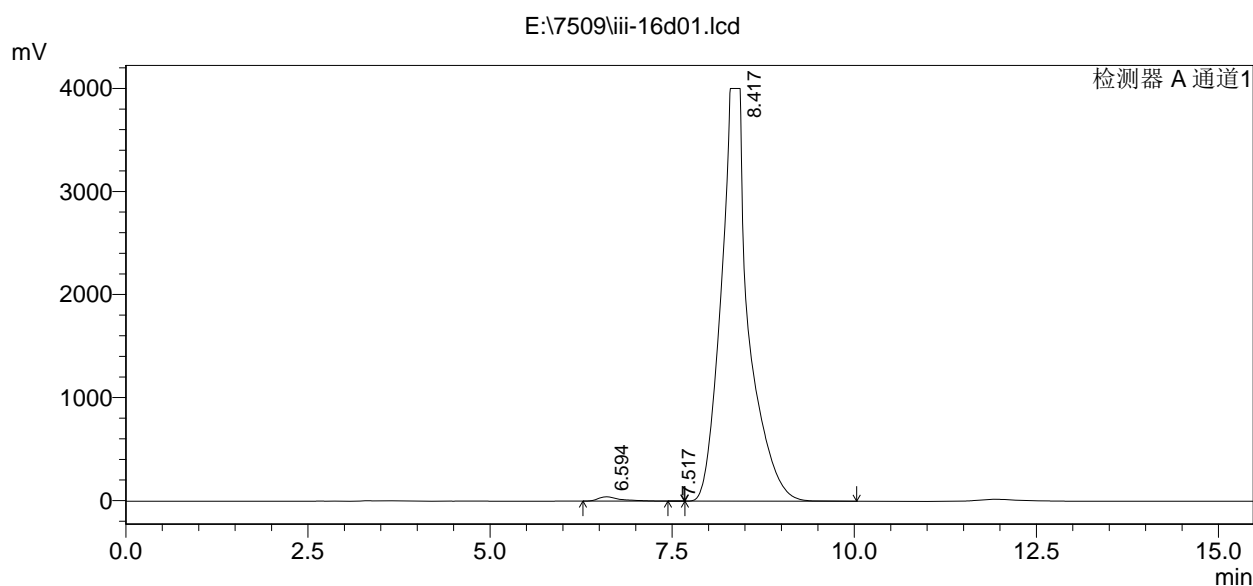

1 检测器 A 通道1/254nm

峰表

检测器 A Ch1 254nm

| 峰# | 保留时间  | 面积        | 高度      | 面积 %    |
|----|-------|-----------|---------|---------|
| 1  | 6.594 | 879810    | 42279   | 0.820   |
| 2  | 7.517 | 1213      | 140     | 0.001   |
| 3  | 8.417 | 106403009 | 4005228 | 99.179  |
| 总计 |       | 107284033 | 4047647 | 100.000 |



# ==== Shimadzu LCsolution 分析报告 ====

采集人 : Admin  
 样品名称 : III-16e  
 样品 ID : III-16e  
 样品瓶# : 1  
 进样体积 : 20 uL  
 数据文件名 : iii-16e01.lcd  
 方法文件名 : yn-w5-50%.lcm  
 批处理文件名 :  
 报告文件名 : Default.lcr  
 数据采集 : 2021/9/7 14:42:59  
 数据处理 : 2021/9/7 14:53:46

## <色谱图>

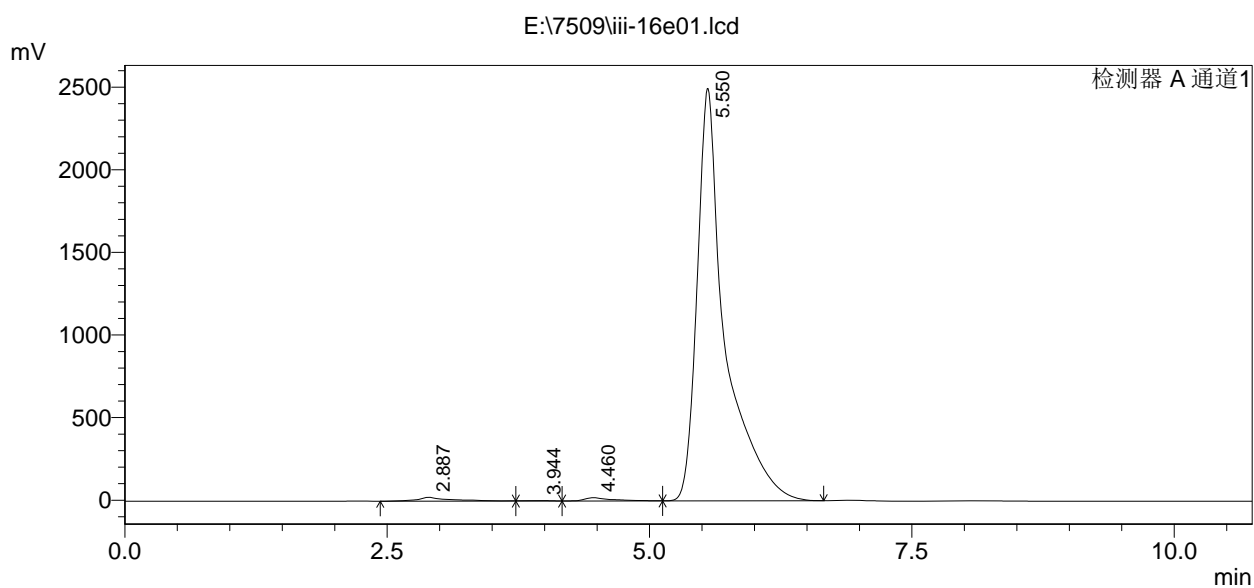

峰表

检测器 A Ch1 254nm

| 峰# | 保留时间  | 面积       | 高度      | 面积 %    |
|----|-------|----------|---------|---------|
| 1  | 2.887 | 498853   | 23708   | 1.062   |
| 2  | 3.944 | 52580    | 3825    | 0.112   |
| 3  | 4.460 | 375259   | 20235   | 0.799   |
| 4  | 5.550 | 46068263 | 2496743 | 98.028  |
| 总计 |       | 46994954 | 2544512 | 100.000 |

# ==== Shimadzu LCsolution 分析报告 ====

采集人 : Admin  
 样品名称 : III-16f  
 样品 ID : III-16f  
 样品瓶# : 1  
 进样体积 : 20 uL  
 数据文件名 : iii-16f01.lcd  
 方法文件名 : yn-w5-50%.lcm  
 批处理文件名 :  
 报告文件名 : Default.lcr  
 数据采集 : 2021/9/7 14:57:13  
 数据处理 : 2021/9/7 15:07:28

## <色谱图>

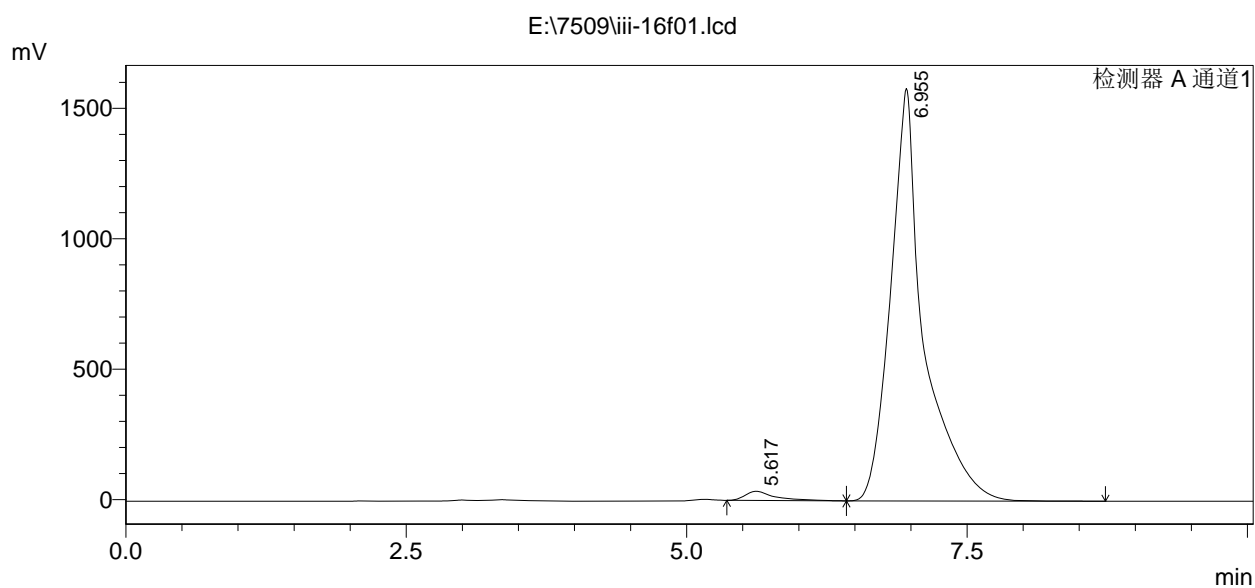

峰表

检测器 A Ch1 254nm

| 峰# | 保留时间  | 面积       | 高度      | 面积 %    |
|----|-------|----------|---------|---------|
| 1  | 5.617 | 645507   | 35157   | 1.947   |
| 2  | 6.955 | 32511187 | 1581798 | 98.053  |
| 总计 |       | 33156694 | 1616954 | 100.000 |

# ==== Shimadzu LCsolution 分析报告 ====

采集人 : Admin  
 样品名称 : III-16g  
 样品 ID : III-16g  
 样品瓶# : 1  
 进样体积 : 20 uL  
 数据文件名 : iii-16g01.lcd  
 方法文件名 : yn-w5-50%.lcm  
 批处理文件名 :  
 报告文件名 : Default.lcr  
 数据采集 : 2021/9/7 20:27:54  
 数据处理 : 2021/9/7 20:36:52

## <色谱图>

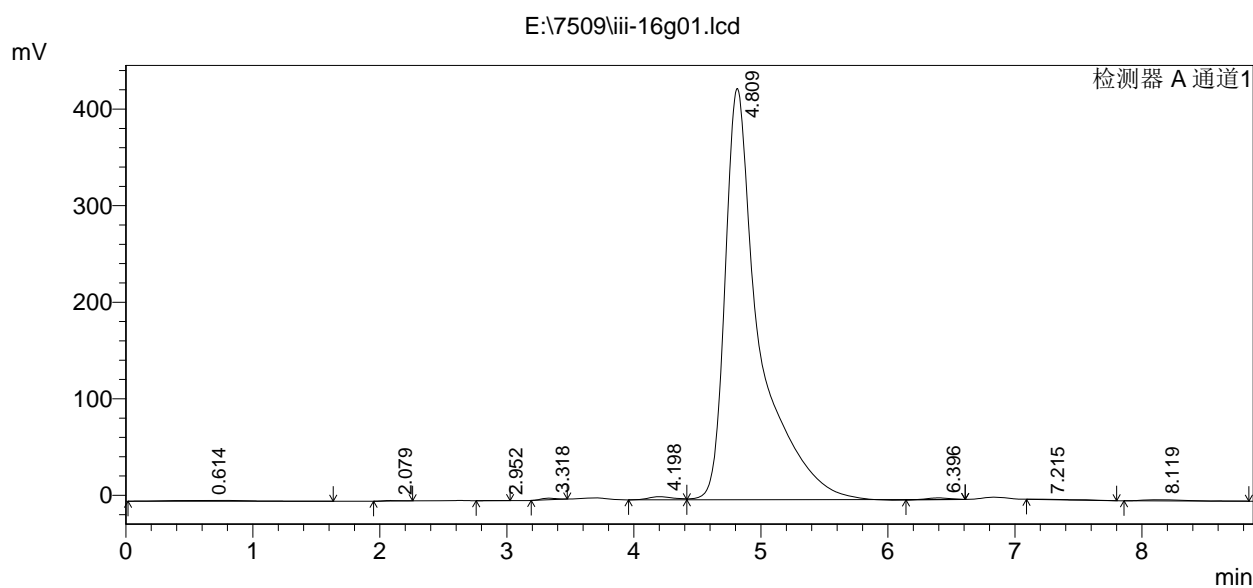

1 检测器 A 通道1/254nm

峰表

检测器 A Ch1 254nm

| 峰# | 保留时间  | 面积      | 高度     | 面积 %    |
|----|-------|---------|--------|---------|
| 1  | 0.614 | 34557   | 1092   | 0.426   |
| 2  | 2.079 | 4403    | 569    | 0.054   |
| 3  | 2.952 | 702     | 64     | 0.009   |
| 4  | 3.318 | 13677   | 1691   | 0.169   |
| 5  | 4.198 | 44190   | 3263   | 0.544   |
| 6  | 4.809 | 7955968 | 425936 | 98.030  |
| 7  | 6.396 | 22710   | 1799   | 0.280   |
| 8  | 7.215 | 12002   | 489    | 0.148   |
| 9  | 8.119 | 27651   | 1359   | 0.341   |
| 总计 |       | 8115860 | 436261 | 100.000 |

# ==== Shimadzu LCsolution 分析报告 ====

采集人 : Admin  
 样品名称 : IV-19a  
 样品 ID : IV-19a  
 样品瓶# : 1  
 进样体积 : 20 uL  
 数据文件名 : iv-19a03.lcd  
 方法文件名 : yn-w5-50%.lcm  
 批处理文件名 :  
 报告文件名 : Default.lcr  
 数据采集 : 2021/9/7 21:12:02  
 数据处理 : 2021/9/7 21:19:41

## <色谱图>

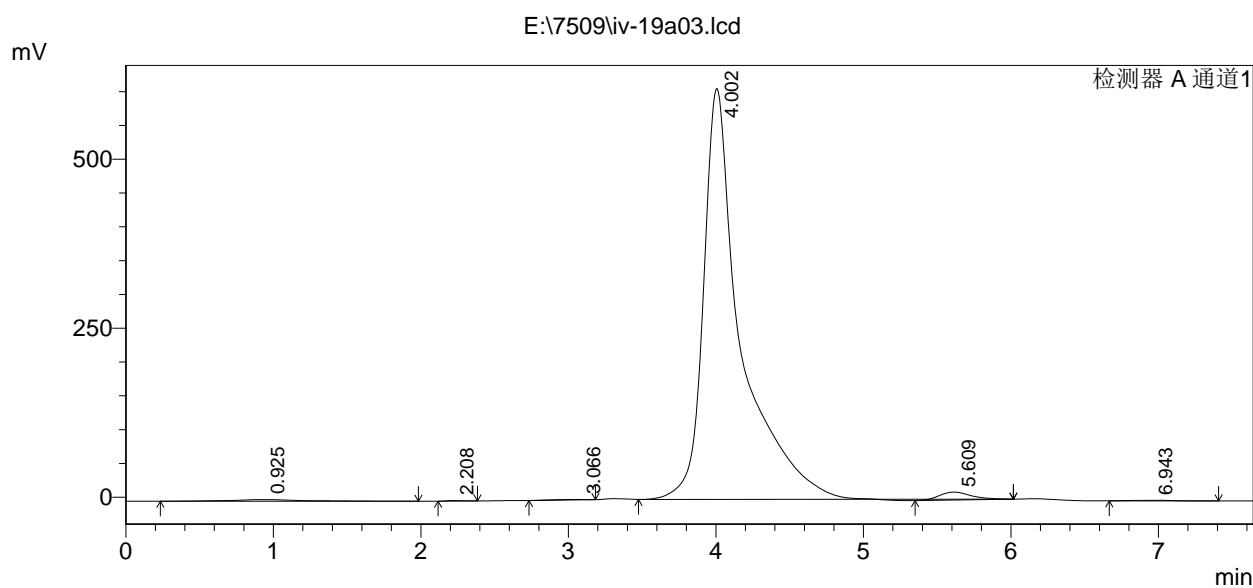

1 检测器 A 通道1/254nm

峰表

检测器 A Ch1 254nm

| 峰# | 保留时间  | 面积       | 高度     | 面积 %    |
|----|-------|----------|--------|---------|
| 1  | 0.925 | 85835    | 2526   | 0.786   |
| 2  | 2.208 | 6342     | 878    | 0.058   |
| 3  | 3.066 | 11631    | 556    | 0.107   |
| 4  | 4.002 | 10614661 | 607854 | 97.226  |
| 5  | 5.609 | 179025   | 11825  | 1.640   |
| 6  | 6.943 | 19988    | 1303   | 0.183   |
| 总计 |       | 10917482 | 624943 | 100.000 |

# ==== Shimadzu LCsolution 分析报告 ====

采集人 : Admin  
 样品名称 : IV-19b  
 样品 ID : IV-19b  
 样品瓶# : 1  
 进样体积 : 20 uL  
 数据文件名 : iv-19b03.lcd  
 方法文件名 : yn-w5-50%.lcm  
 批处理文件名 :  
 报告文件名 : Default.lcr  
 数据采集 : 2021/9/7 21:00:22  
 数据处理 : 2021/9/7 21:10:39

## <色谱图>

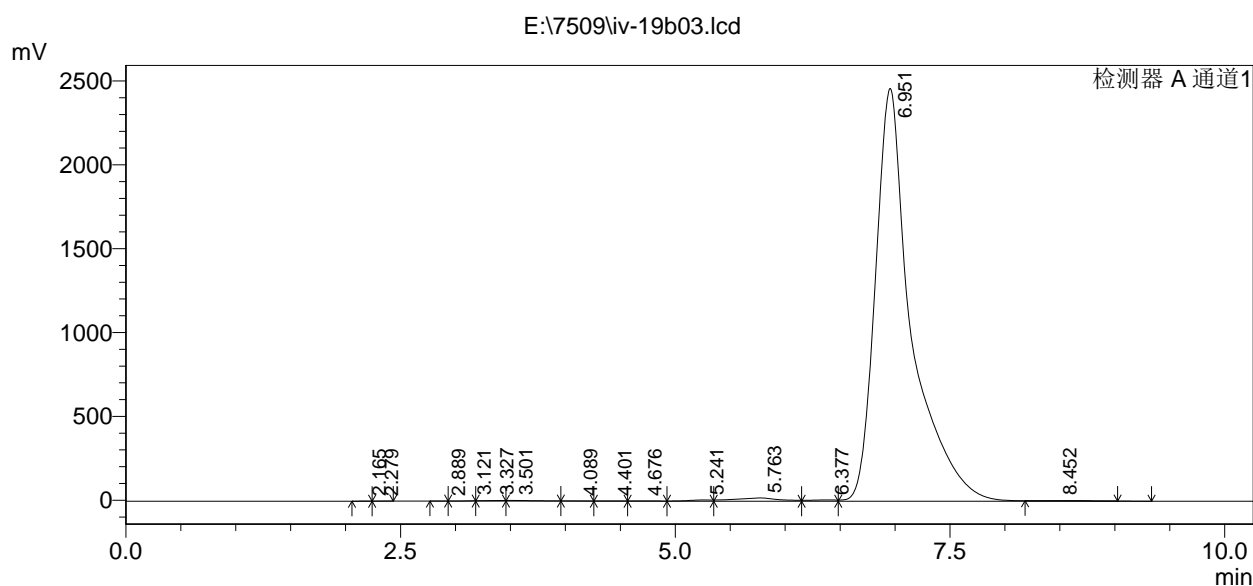

1 检测器 A 通道1/254nm

## 峰表

检测器 A Ch1 254nm

| 峰# | 保留时间  | 面积       | 高度      | 面积 %    |
|----|-------|----------|---------|---------|
| 1  | 2.165 | 5728     | 802     | 0.010   |
| 2  | 2.279 | 3245     | 496     | 0.006   |
| 3  | 2.889 | 3014     | 496     | 0.005   |
| 4  | 3.121 | 18955    | 1928    | 0.033   |
| 5  | 3.327 | 60113    | 4440    | 0.105   |
| 6  | 3.501 | 79969    | 4195    | 0.140   |
| 7  | 4.089 | 26181    | 1658    | 0.046   |
| 8  | 4.401 | 26109    | 1670    | 0.046   |
| 9  | 4.676 | 26977    | 1549    | 0.047   |
| 10 | 5.241 | 103420   | 6874    | 0.181   |
| 11 | 5.763 | 540715   | 19312   | 0.947   |
| 12 | 6.377 | 129250   | 7302    | 0.226   |
| 13 | 6.951 | 56013267 | 2461079 | 98.127  |
| 14 | 8.452 | 45611    | 2330    | 0.080   |
| 总计 |       | 57082554 | 2514132 | 100.000 |

# ==== Shimadzu LCsolution 分析报告 ====

采集人 : Admin  
 样品名称 : IV-19c  
 样品 ID : IV-19c  
 样品瓶# : 1  
 进样体积 : 20 uL  
 数据文件名 : iv-19c01.lcd  
 方法文件名 : yn-w5-50%.lcm  
 批处理文件名 :  
 报告文件名 : Default.lcr  
 数据采集 : 2021/9/7 15:45:29  
 数据处理 : 2021/9/7 15:57:27

## <色谱图>

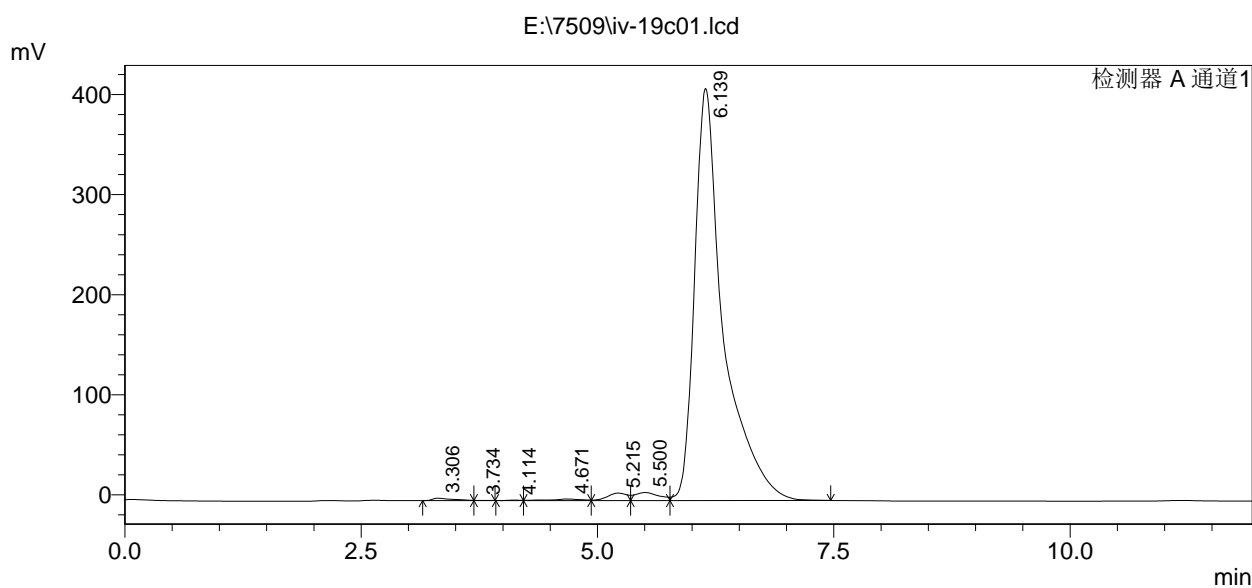

1 检测器 A 通道1/254nm

峰表

检测器 A Ch1 254nm

| 峰# | 保留时间  | 面积      | 高度     | 面积 %    |
|----|-------|---------|--------|---------|
| 1  | 3.306 | 36590   | 2405   | 0.404   |
| 2  | 3.734 | 2602    | 343    | 0.029   |
| 3  | 4.114 | 5655    | 528    | 0.062   |
| 4  | 4.671 | 37959   | 1662   | 0.419   |
| 5  | 5.215 | 110454  | 7531   | 1.218   |
| 6  | 5.500 | 146405  | 8110   | 1.615   |
| 7  | 6.139 | 8728335 | 411759 | 96.254  |
| 总计 |       | 9068000 | 432339 | 100.000 |

# ==== Shimadzu LCsolution 分析报告 ====

采集人 : Admin  
 样品名称 : V-25a  
 样品 ID : V-25a  
 样品瓶# : 1  
 进样体积 : 20 uL  
 数据文件名 : v-25a01.lcd  
 方法文件名 : yn-w5-50%.lcm  
 批处理文件名 :  
 报告文件名 : Default.lcr  
 数据采集 : 2021/9/7 19:52:09  
 数据处理 : 2021/9/7 20:00:06

## <色谱图>

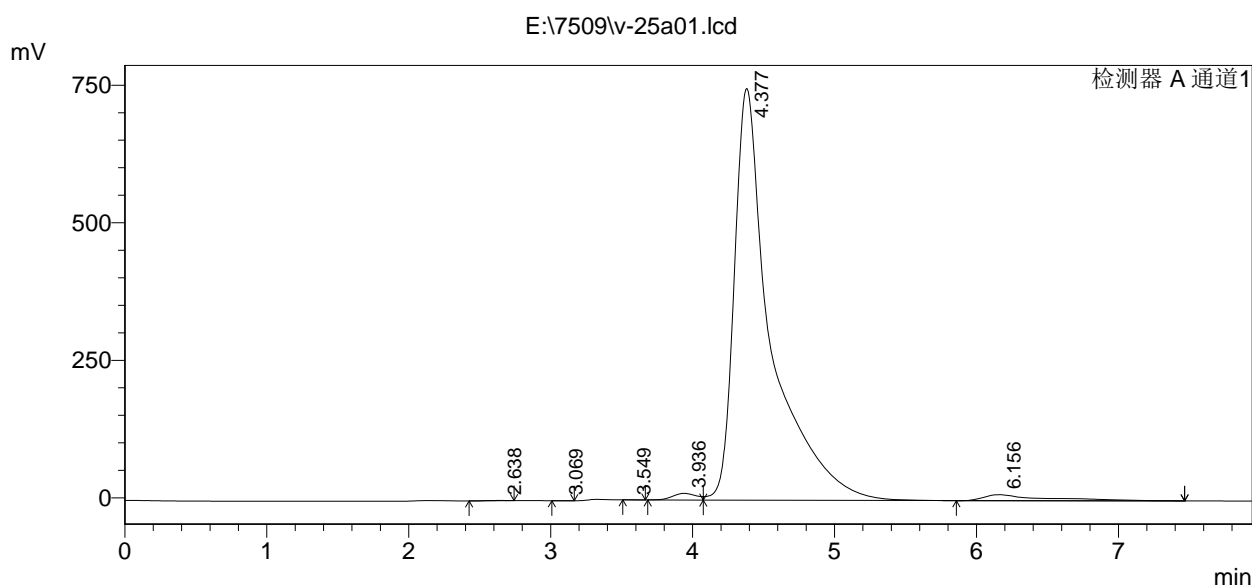

1 检测器 A 通道1/254nm

峰表

检测器 A Ch1 254nm

| 峰# | 保留时间  | 面积       | 高度     | 面积 %    | 高度 %    |
|----|-------|----------|--------|---------|---------|
| 1  | 2.638 | 3988     | 414    | 0.029   | 0.054   |
| 2  | 3.069 | 231      | 48     | 0.002   | 0.006   |
| 3  | 3.549 | 620      | 92     | 0.004   | 0.012   |
| 4  | 3.936 | 144034   | 12218  | 1.034   | 1.582   |
| 5  | 4.377 | 13445457 | 748296 | 96.503  | 96.891  |
| 6  | 6.156 | 338356   | 11237  | 2.429   | 1.455   |
| 总计 |       | 13932686 | 772306 | 100.000 | 100.000 |

# ==== Shimadzu LCsolution 分析报告 ====

采集人 : Admin  
 样品名称 : V-25b  
 样品 ID : V-25b  
 样品瓶# : 1  
 进样体积 : 20 uL  
 数据文件名 : v-25b03.lcd  
 方法文件名 : yn-w5-50%.lcm  
 批处理文件名 :  
 报告文件名 : Default.lcr  
 数据采集 : 2021/9/7 21:37:52  
 数据处理 : 2021/9/7 21:45:43

## <色谱图>

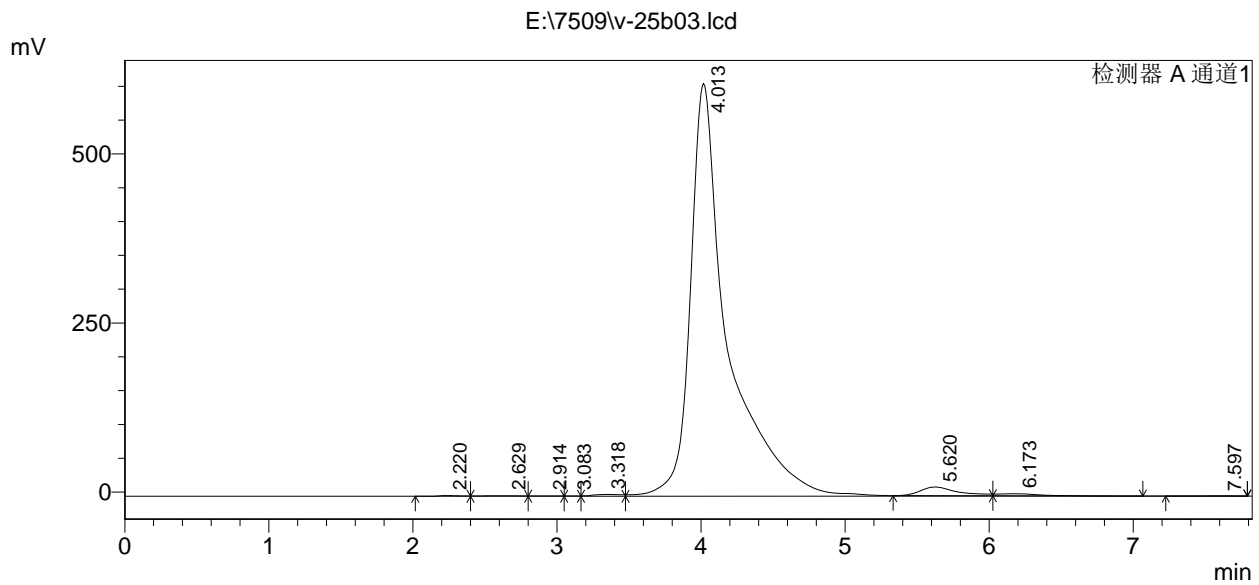

1 检测器 A 通道1/254nm

峰表

检测器 A Ch1 254nm

| 峰# | 保留时间  | 面积       | 高度     | 面积 %    |
|----|-------|----------|--------|---------|
| 1  | 2.220 | 10614    | 1073   | 0.094   |
| 2  | 2.629 | 16190    | 857    | 0.143   |
| 3  | 2.914 | 10515    | 800    | 0.093   |
| 4  | 3.083 | 4317     | 641    | 0.038   |
| 5  | 3.318 | 36552    | 2917   | 0.322   |
| 6  | 4.013 | 10969178 | 610289 | 96.685  |
| 7  | 5.620 | 229381   | 12837  | 2.022   |
| 8  | 6.173 | 64482    | 3133   | 0.568   |
| 9  | 7.597 | 4042     | 271    | 0.036   |
| 总计 |       | 11345270 | 632818 | 100.000 |



# ==== Shimadzu LCsolution 分析报告 ====

采集人 : Admin  
 样品名称 : V-25c  
 样品 ID : V-25c  
 样品瓶# : 1  
 进样体积 : 20 uL  
 数据文件名 : v-25c01.lcd  
 方法文件名 : yn-w5-50%.lcm  
 批处理文件名 :  
 报告文件名 : Default.lcr  
 数据采集 : 2021/9/7 18:51:48  
 数据处理 : 2021/9/7 19:01:17

## <色谱图>

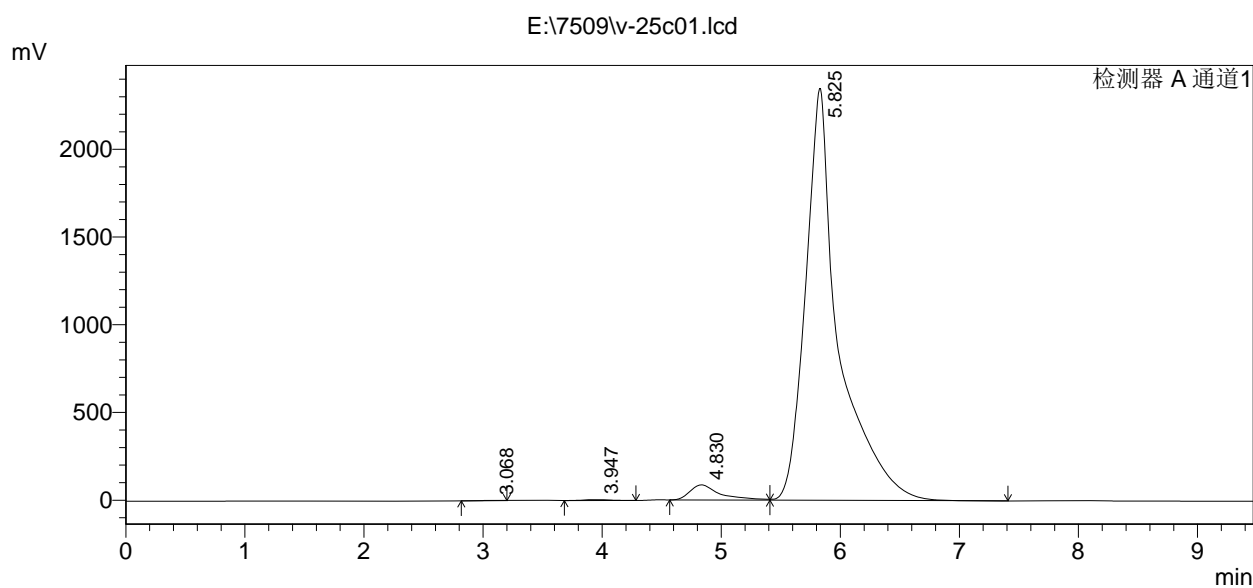

1 检测器 A 通道1/254nm

峰表

检测器 A Ch1 254nm

| 峰# | 保留时间  | 面积       | 高度      | 面积 %    |
|----|-------|----------|---------|---------|
| 1  | 3.068 | 23000    | 2461    | 0.049   |
| 2  | 3.947 | 73510    | 5637    | 0.157   |
| 3  | 4.830 | 1519132  | 86257   | 3.251   |
| 4  | 5.825 | 45105819 | 2347793 | 96.542  |
| 总计 |       | 46721461 | 2442149 | 100.000 |

# ==== Shimadzu LCsolution 分析报告 ====

采集人 : Admin  
 样品名称 : V-25d  
 样品 ID : V-25d  
 样品瓶# : 1  
 进样体积 : 20 uL  
 数据文件名 : v-25d01.lcd  
 方法文件名 : yn-w5-50%.lcm  
 批处理文件名 :  
 报告文件名 : Default.lcr  
 数据采集 : 2021/9/7 19:02:20  
 数据处理 : 2021/9/7 19:16:25

## <色谱图>

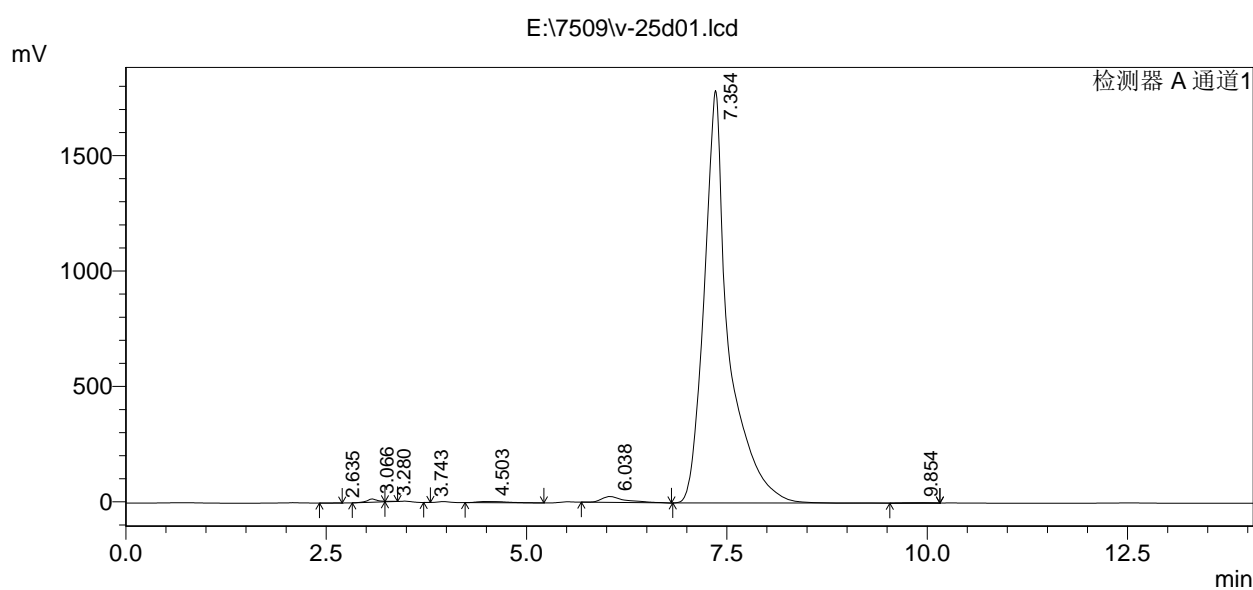

峰表

检测器 A Ch1 254nm

| 峰# | 保留时间  | 面积       | 高度      | 面积 %    |
|----|-------|----------|---------|---------|
| 1  | 2.635 | 1638     | 169     | 0.004   |
| 2  | 3.066 | 132305   | 13971   | 0.342   |
| 3  | 3.280 | 15974    | 2596    | 0.041   |
| 4  | 3.743 | 121      | 38      | 0.000   |
| 5  | 4.503 | 142628   | 5497    | 0.369   |
| 6  | 6.038 | 523820   | 25666   | 1.355   |
| 7  | 7.354 | 37822576 | 1787028 | 97.809  |
| 8  | 9.854 | 30940    | 1771    | 0.080   |
| 总计 |       | 38670001 | 1836737 | 100.000 |

# ==== Shimadzu LCsolution 分析报告 ====

采集人 : Admin  
 样品名称 : V-25e  
 样品 ID : V-25e  
 样品瓶# : 1  
 进样体积 : 20 uL  
 数据文件名 : v-25e01.lcd  
 方法文件名 : yn-w5-50%.lcm  
 批处理文件名 :  
 报告文件名 : Default.lcr  
 数据采集 : 2021/9/7 19:17:39  
 数据处理 : 2021/9/7 19:27:55

## <色谱图>

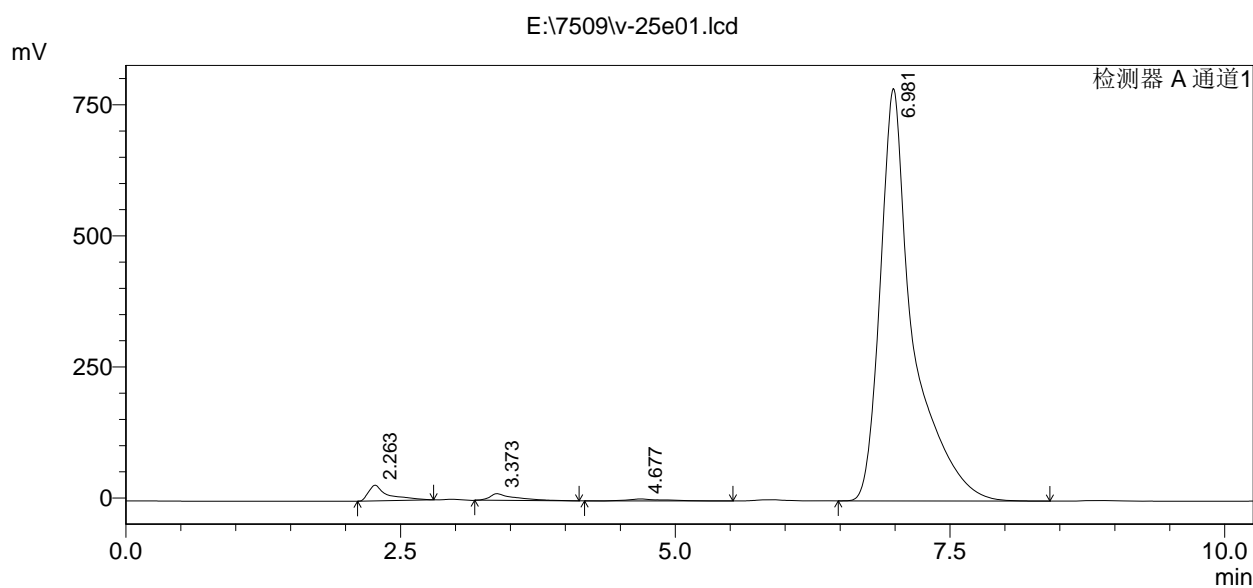

峰表

检测器 A Ch1 254nm

| 峰# | 保留时间  | 面积       | 高度     | 面积 %    |
|----|-------|----------|--------|---------|
| 1  | 2.263 | 365184   | 29981  | 2.153   |
| 2  | 3.373 | 198089   | 12750  | 1.168   |
| 3  | 4.677 | 86725    | 3823   | 0.511   |
| 4  | 6.981 | 16309021 | 786721 | 96.167  |
| 总计 |       | 16959020 | 833274 | 100.000 |

# ==== Shimadzu LCsolution 分析报告 ====

采集人 : Admin  
 样品名称 : V-25f  
 样品 ID : V-25f  
 样品瓶# : 1  
 进样体积 : 20 uL  
 数据文件名 : v-25f01.lcd  
 方法文件名 : yn-w5-50%.lcm  
 批处理文件名 :  
 报告文件名 : Default.lcr  
 数据采集 : 2021/9/7 19:29:25  
 数据处理 : 2021/9/7 19:37:26

## <色谱图>

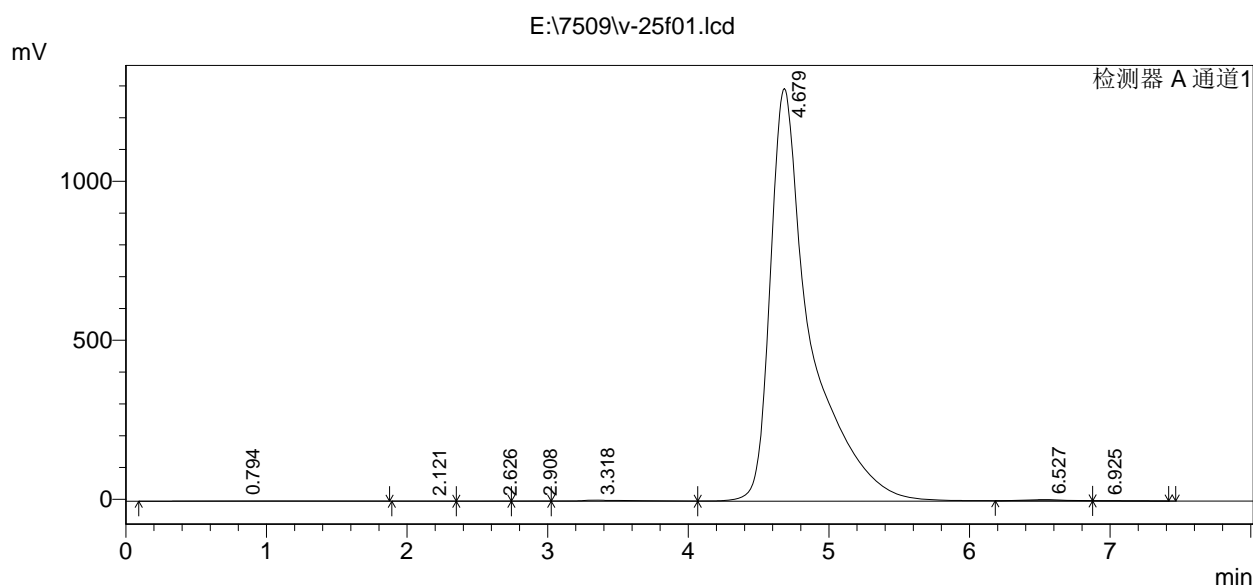

1 检测器 A 通道1/254nm

峰表

检测器 A Ch1 254nm

| 峰# | 保留时间  | 面积       | 高度      | 面积 %    |
|----|-------|----------|---------|---------|
| 1  | 0.794 | 55815    | 1719    | 0.214   |
| 2  | 2.121 | 15708    | 1217    | 0.060   |
| 3  | 2.626 | 20420    | 1037    | 0.078   |
| 4  | 2.908 | 13306    | 797     | 0.051   |
| 5  | 3.318 | 100581   | 3411    | 0.385   |
| 6  | 4.679 | 25851150 | 1297774 | 98.905  |
| 7  | 6.527 | 69562    | 3623    | 0.266   |
| 8  | 6.925 | 10733    | 753     | 0.041   |
| 总计 |       | 26137276 | 1310329 | 100.000 |

# ==== Shimadzu LCsolution 分析报告 ====

采集人 : Admin  
 样品名称 : V-25g  
 样品 ID : V-25g  
 样品瓶# : 1  
 进样体积 : 20 uL  
 数据文件名 : v-25g02.lcd  
 方法文件名 : yn-w5-50%.lcm  
 批处理文件名 :  
 报告文件名 : Default.lcr  
 数据采集 : 2021/9/7 19:39:37  
 数据处理 : 2021/9/7 19:50:28

## <色谱图>

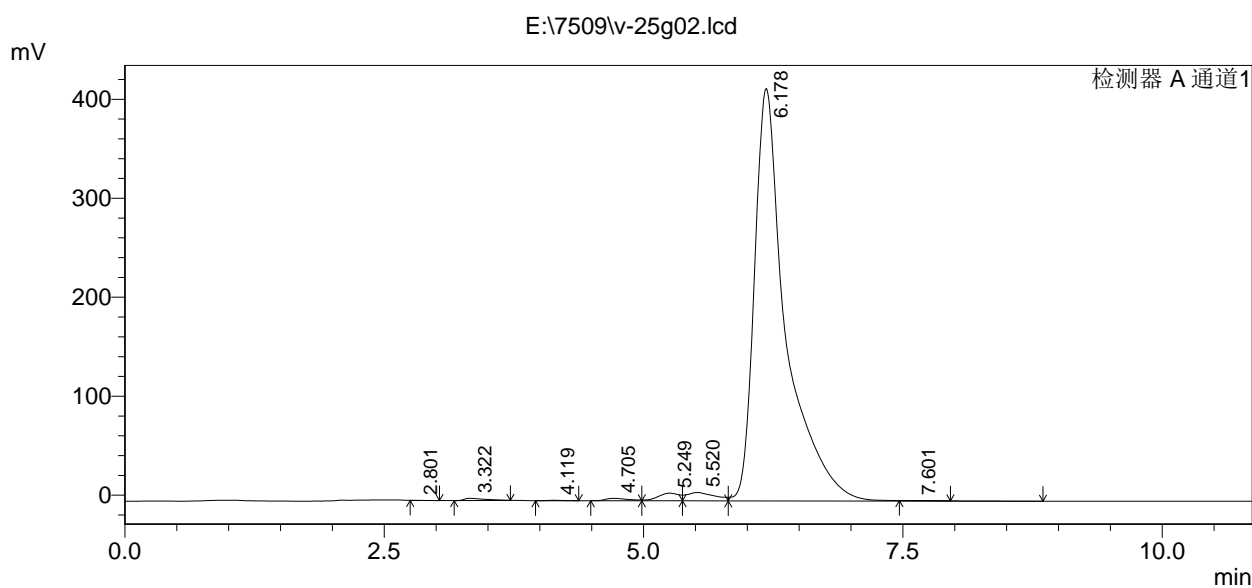

1 检测器 A 通道1/254nm

## 峰表

检测器 A Ch1 254nm

| 峰# | 保留时间  | 面积      | 高度     | 面积 %    |
|----|-------|---------|--------|---------|
| 1  | 2.801 | 726     | 80     | 0.008   |
| 2  | 3.322 | 31460   | 2298   | 0.345   |
| 3  | 4.119 | 4040    | 415    | 0.044   |
| 4  | 4.705 | 36078   | 2451   | 0.395   |
| 5  | 5.249 | 110126  | 7717   | 1.207   |
| 6  | 5.520 | 158719  | 8451   | 1.740   |
| 7  | 6.178 | 8779479 | 416709 | 96.230  |
| 8  | 7.601 | 2811    | 226    | 0.031   |
| 总计 |       | 9123440 | 438347 | 100.000 |

# ==== Shimadzu LCsolution 分析报告 ====

采集人 : Admin  
 样品名称 : V-25h  
 样品 ID : V-25h  
 样品瓶# : 1  
 进样体积 : 20 uL  
 数据文件名 : v-25h02.lcd  
 方法文件名 : yn-w5-50%.lcm  
 批处理文件名 :  
 报告文件名 : Default.lcr  
 数据采集 : 2021/9/7 17:50:58  
 数据处理 : 2021/9/7 17:59:19

## <色谱图>

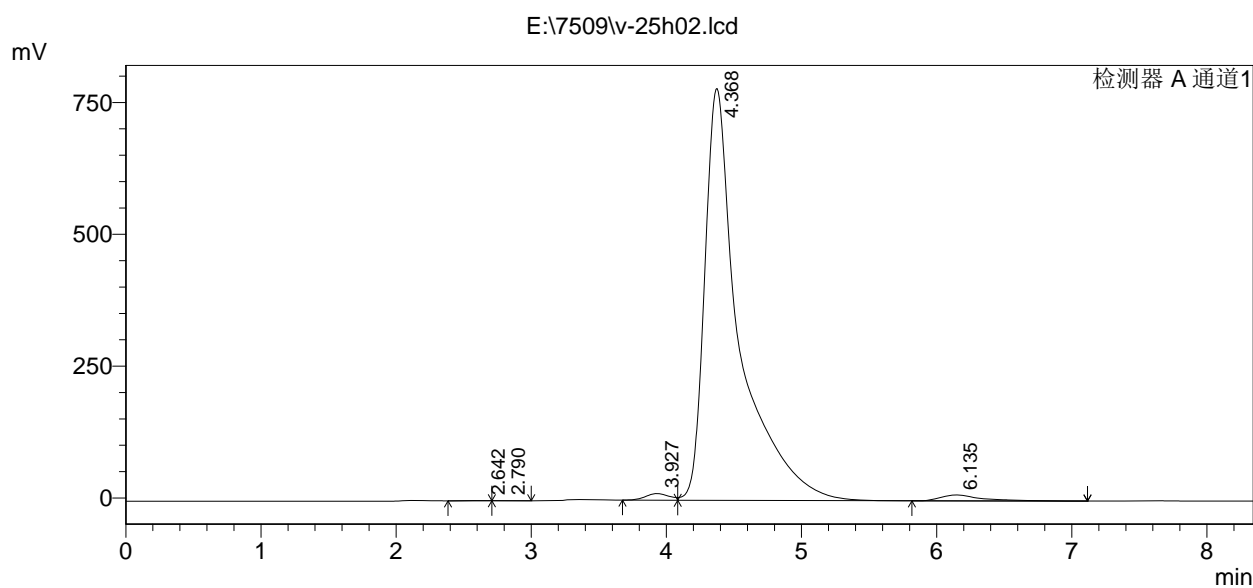

1 检测器 A 通道1/254nm

## 峰表

检测器 A Ch1 254nm

| 峰# | 保留时间  | 面积       | 高度     | 面积 %    |
|----|-------|----------|--------|---------|
| 1  | 2.642 | 2314     | 205    | 0.016   |
| 2  | 2.790 | 2227     | 278    | 0.016   |
| 3  | 3.927 | 154023   | 12665  | 1.072   |
| 4  | 4.368 | 13961307 | 781135 | 97.203  |
| 5  | 6.135 | 243212   | 11557  | 1.693   |
| 总计 |       | 14363083 | 805841 | 100.000 |

# ==== Shimadzu LCsolution 分析报告 ====

采集人 : Admin  
 样品名称 : V-25i  
 样品 ID : V-25i  
 样品瓶# : 1  
 进样体积 : 20 uL  
 数据文件名 : v-25i01.lcd  
 方法文件名 : yn-w5-50%.lcm  
 批处理文件名 :  
 报告文件名 : Default.lcr  
 数据采集 : 2021/9/7 18:05:31  
 数据处理 : 2021/9/7 18:13:30

## <色谱图>

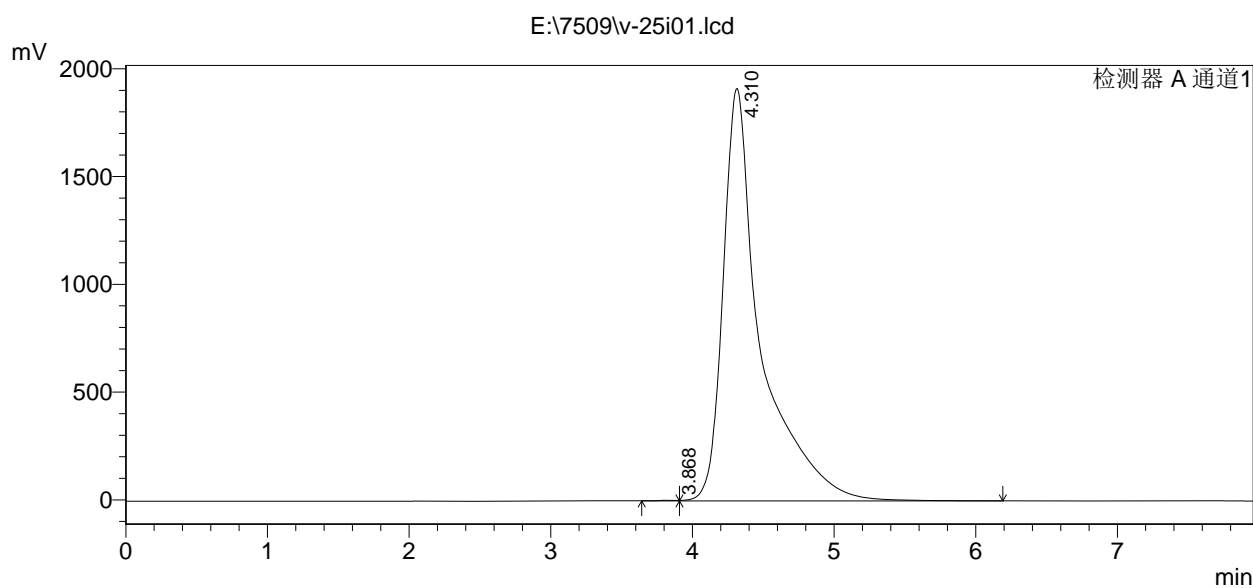

峰表

检测器 A Ch1 254nm

| 峰# | 保留时间  | 面积       | 高度      | 面积 %    |
|----|-------|----------|---------|---------|
| 1  | 3.868 | 25693    | 2946    | 0.073   |
| 2  | 4.310 | 35335972 | 1913041 | 99.927  |
| 总计 |       | 35361665 | 1915987 | 100.000 |

# ==== Shimadzu LCsolution 分析报告 ====

采集人 : Admin  
 样品名称 : V-25j  
 样品 ID : V-25j  
 样品瓶# : 1  
 进样体积 : 20 uL  
 数据文件名 : v-25j03.lcd  
 方法文件名 : yn-w5-50%.lcm  
 批处理文件名 :  
 报告文件名 : Default.lcr  
 数据采集 : 2021/9/7 18:40:26  
 数据处理 : 2021/9/7 18:49:52

## <色谱图>

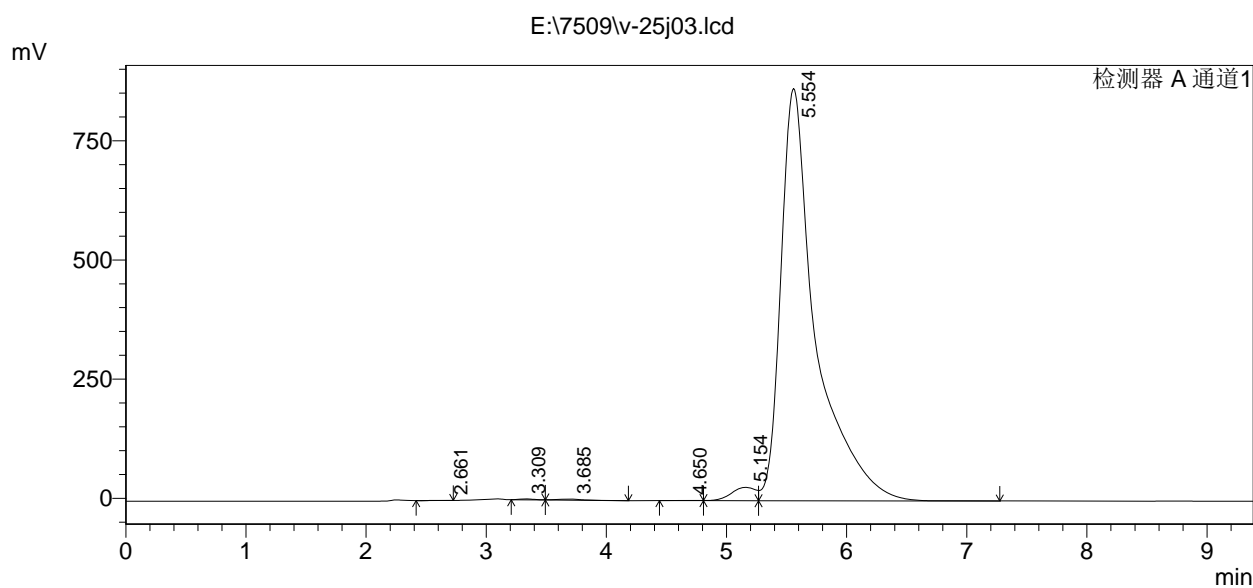

1 检测器 A 通道1/254nm

峰表

| 峰# | 保留时间  | 面积       | 高度     | 面积 %    |
|----|-------|----------|--------|---------|
| 1  | 2.661 | 1174     | 141    | 0.007   |
| 2  | 3.309 | 18977    | 1925   | 0.106   |
| 3  | 3.685 | 35439    | 2470   | 0.199   |
| 4  | 4.650 | 7226     | 579    | 0.040   |
| 5  | 5.154 | 396221   | 28364  | 2.221   |
| 6  | 5.554 | 17383657 | 865039 | 97.427  |
| 总计 |       | 17842695 | 898518 | 100.000 |
