# Supplementary material
Source: PubMed Central journal article supplement (PMC9127657)
Supplement: NIHMS1799873-supplement-Supplementary_2.pdf [file NIHMS1799873-supplement-Supplementary_2.pdf]

**<sup>1</sup>H and <sup>13</sup>C NMR spectra**

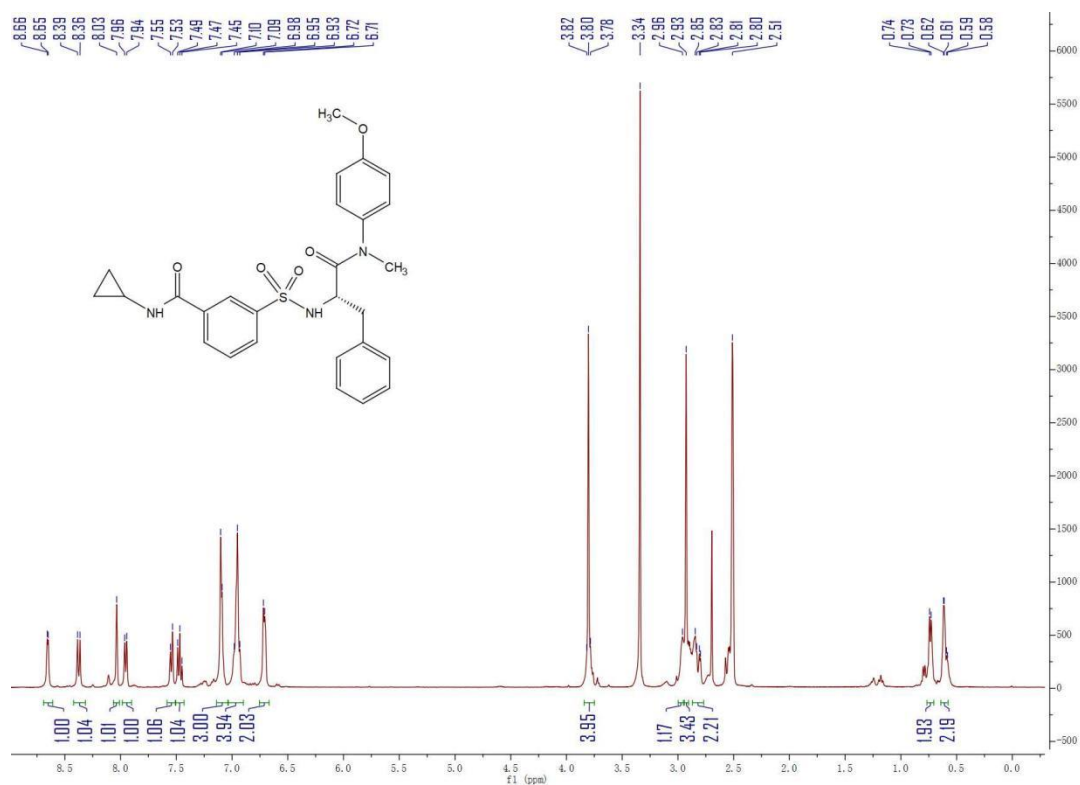

**Fig.1: <sup>1</sup>H NMR spectrum of I-10a**

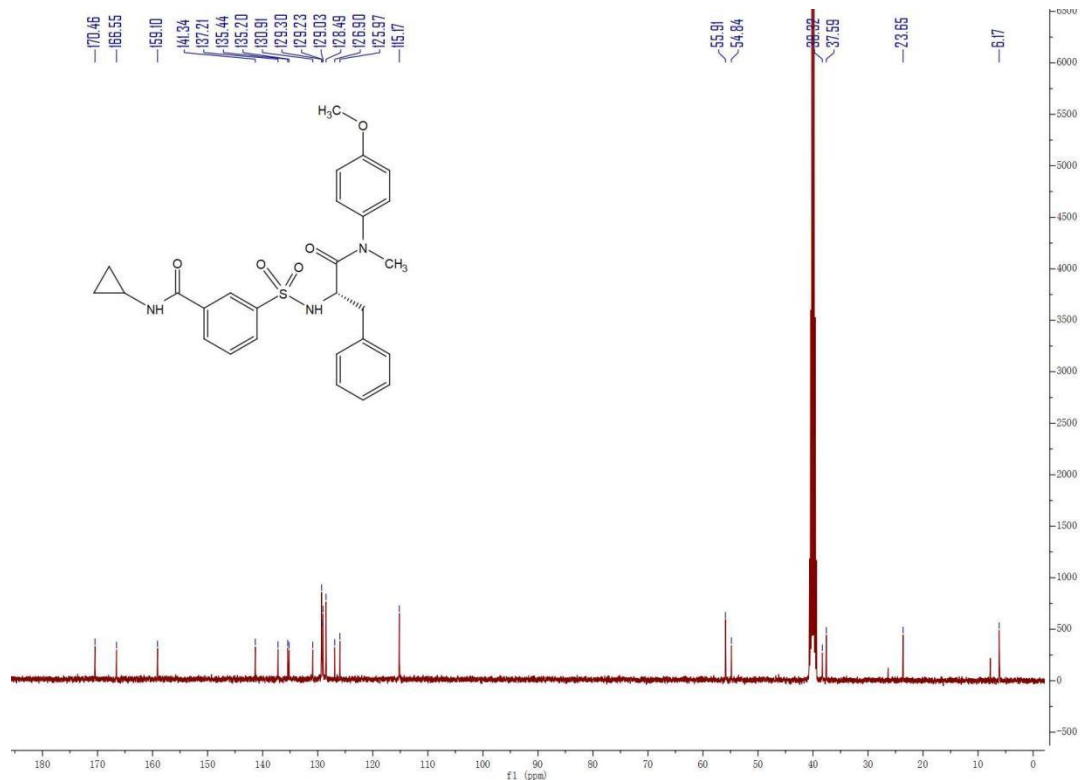

**Fig. 2: <sup>13</sup>C NMR spectrum of I-10a**

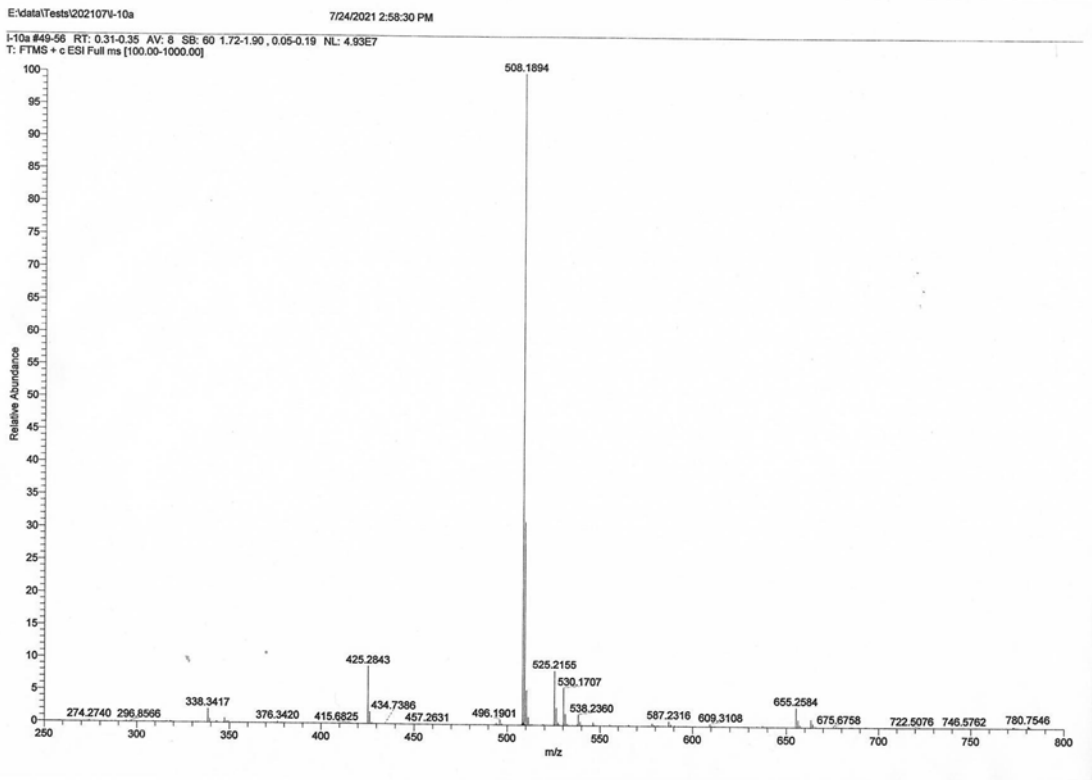

Fig. 3: HRMS spectrum of I-10a

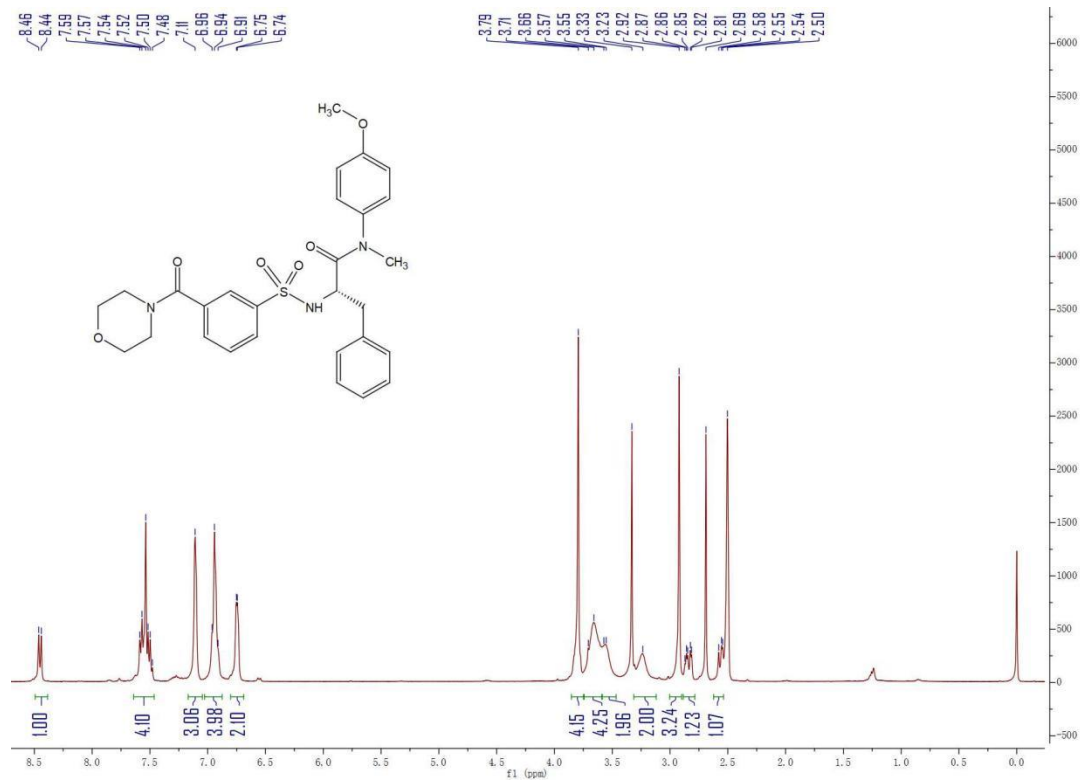

Fig.4: <sup>1</sup>H NMR spectrum of I-10b

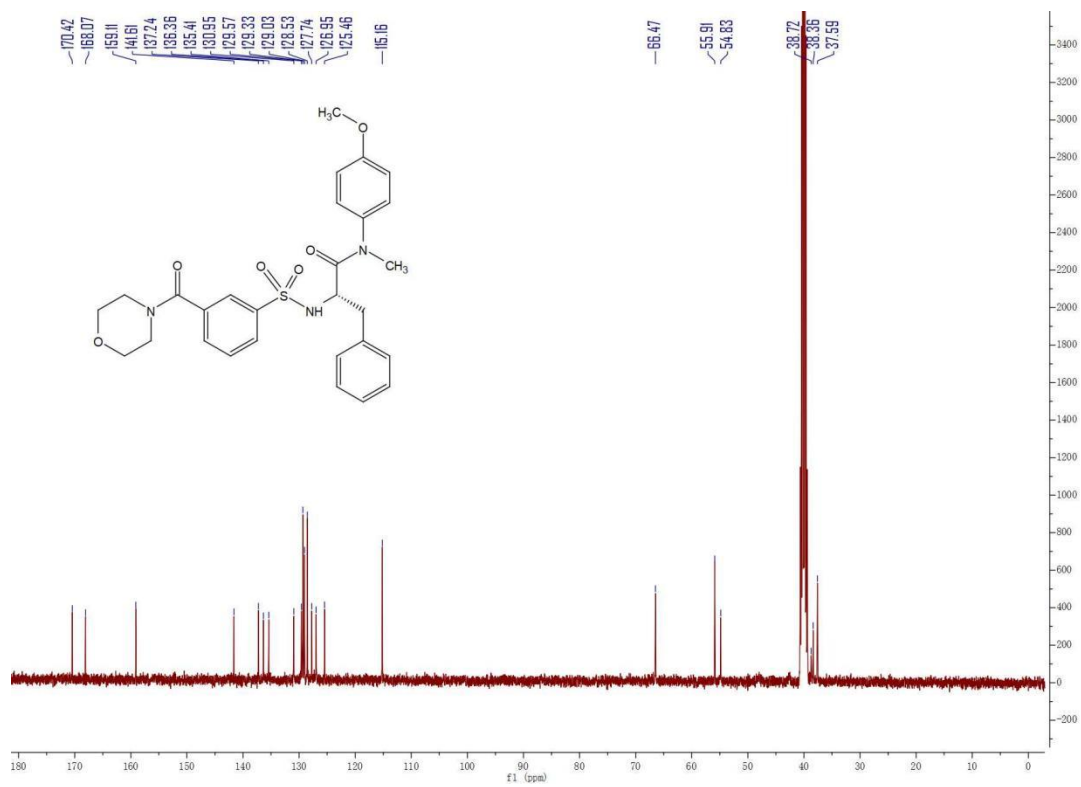

Fig. 5: <sup>13</sup>C NMR spectrum of I-10b

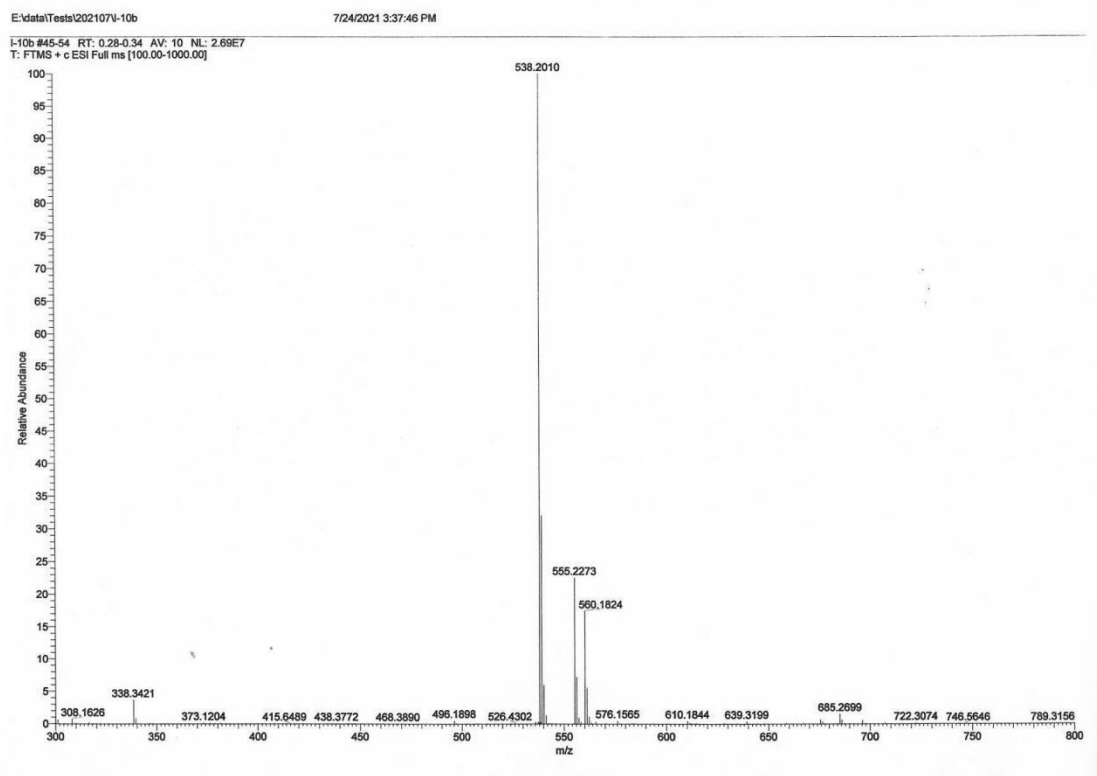

Fig. 6: HRMS spectrum of I-10b

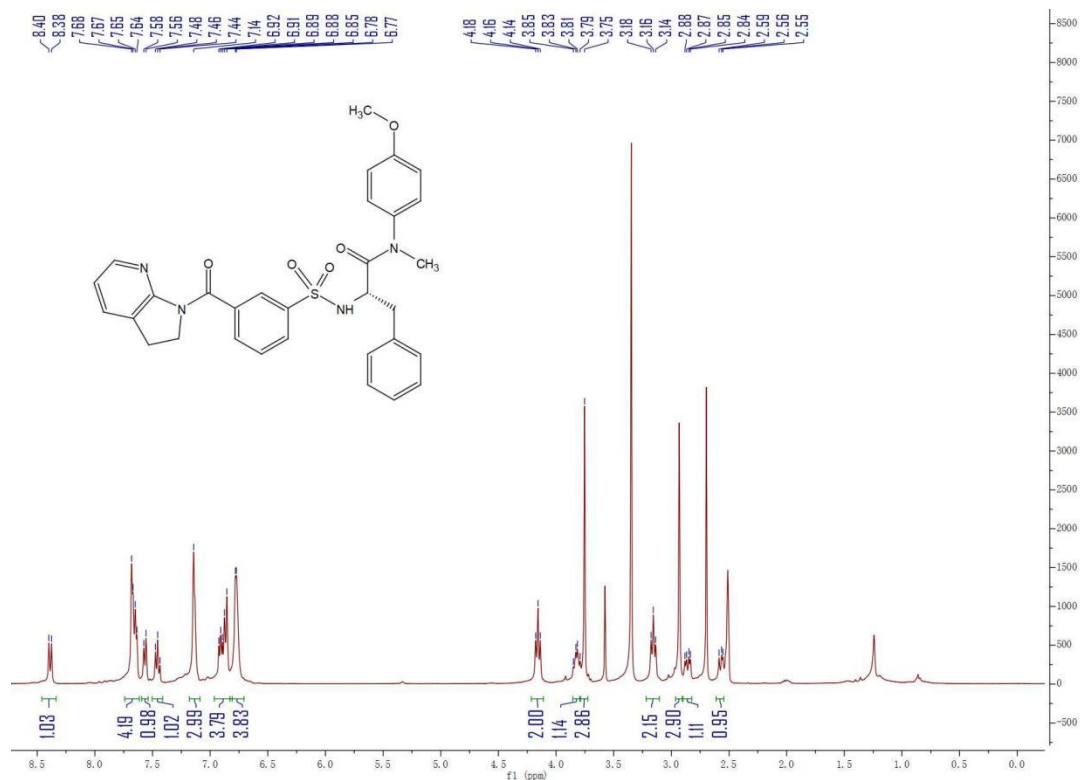

Fig. 7: <sup>1</sup>H NMR spectrum of I-10c

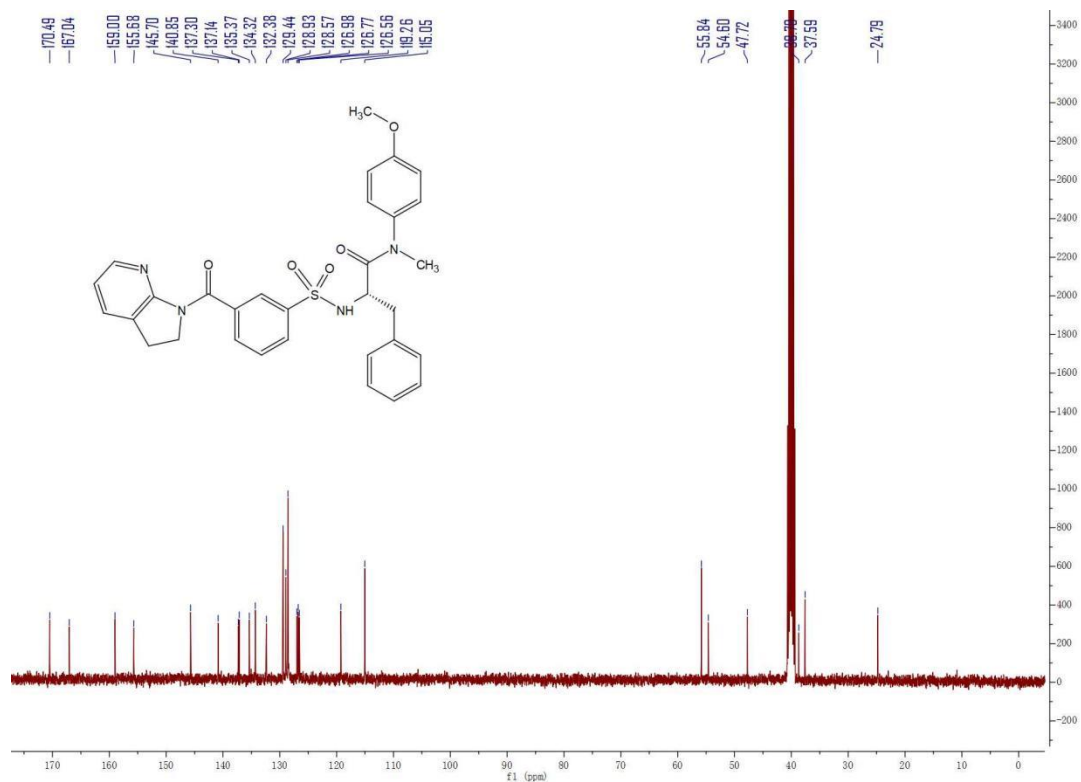

Fig. 8: <sup>13</sup>C NMR spectrum of I-10c

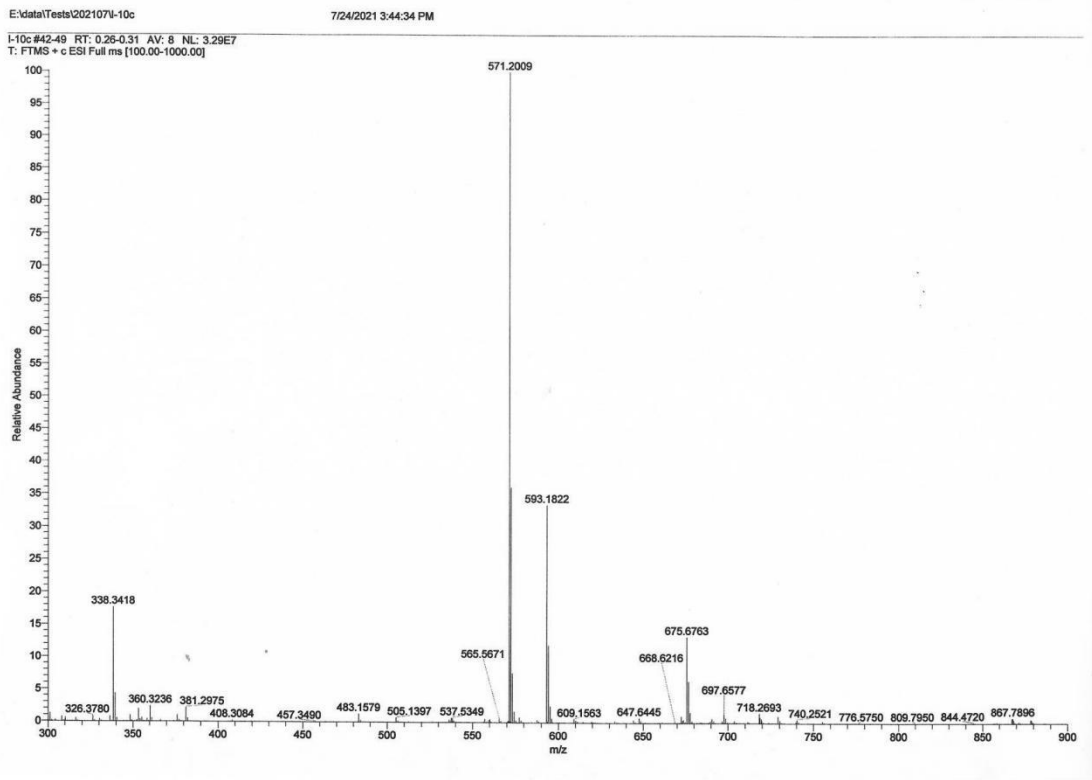

Fig. 9: HRMS spectrum of I-10c

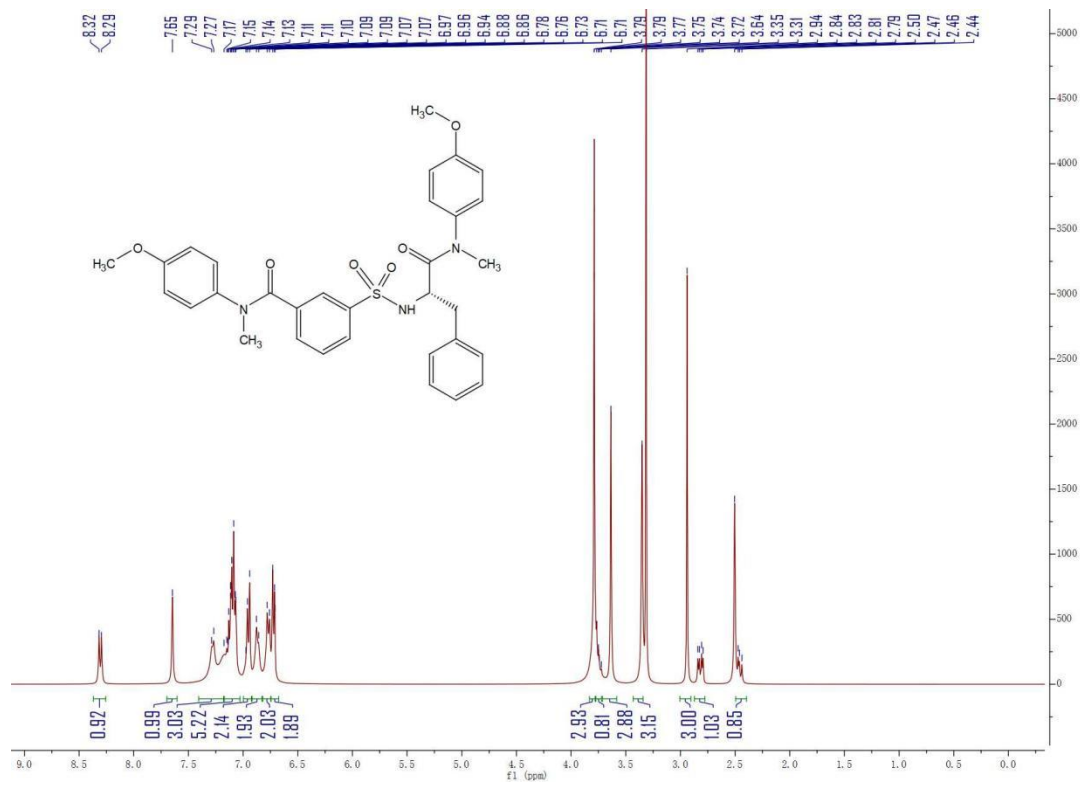

Fig.10: <sup>1</sup>H NMR spectrum of I-10d

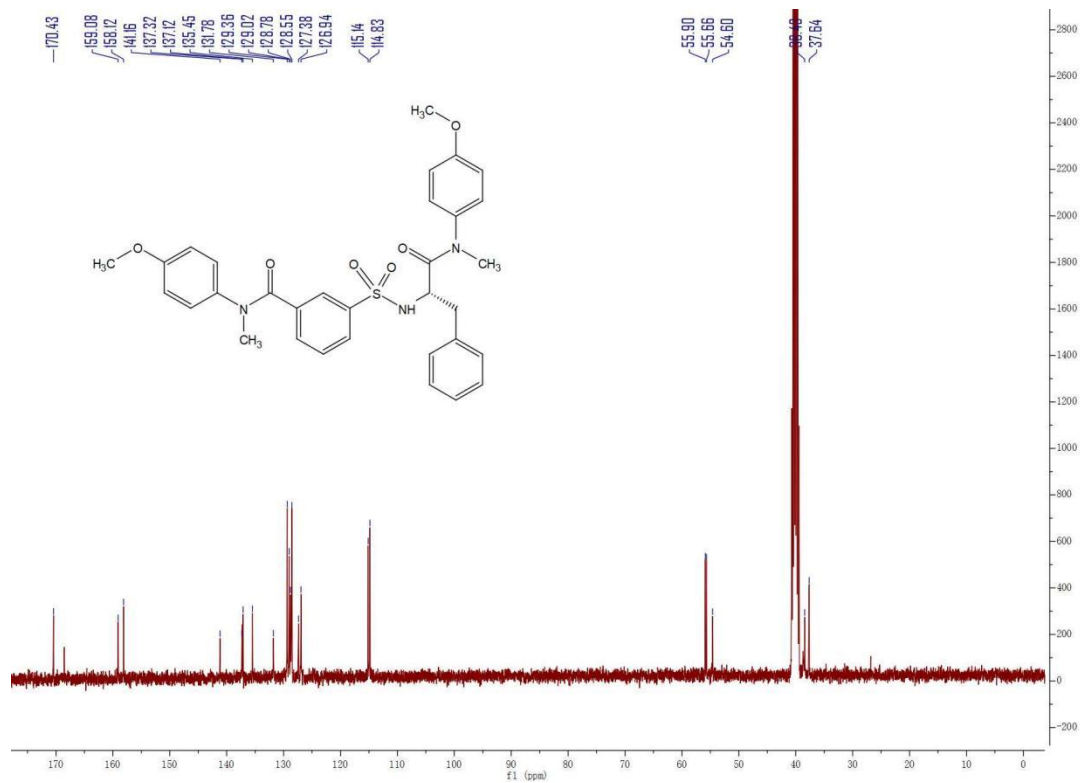

Fig. 11: <sup>13</sup>C NMR spectrum of I-10d

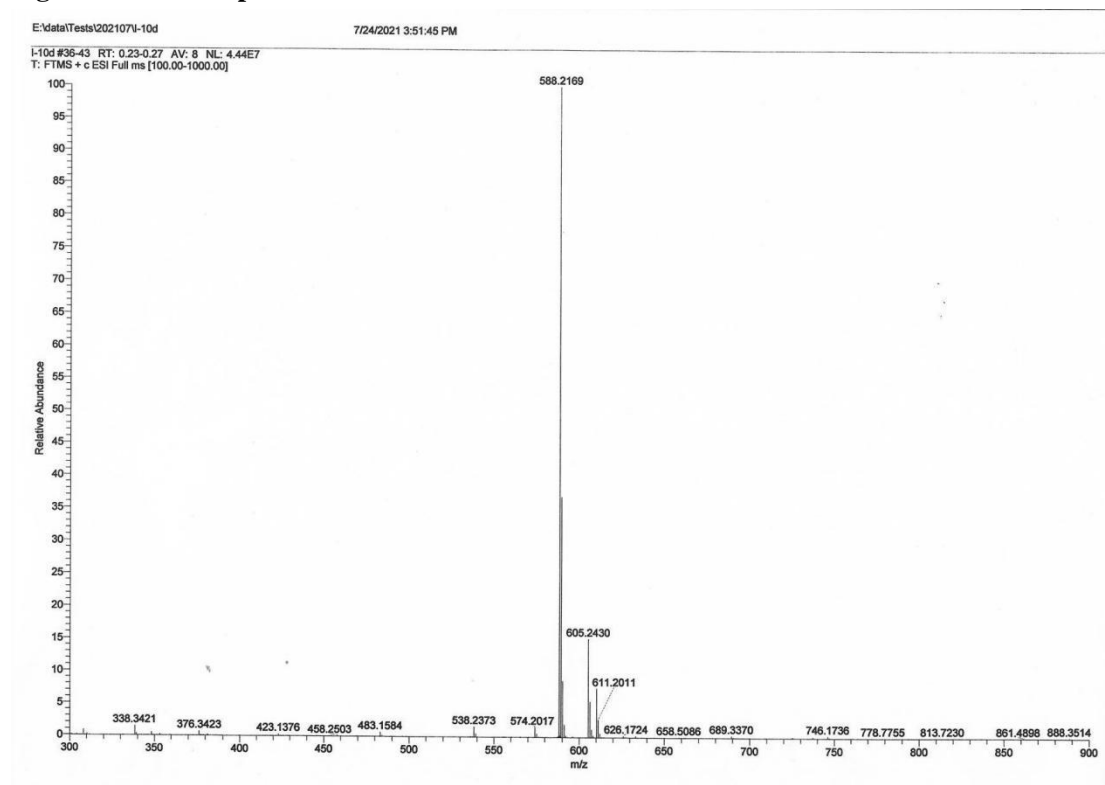

Fig. 12: HRMS spectrum of I-10d

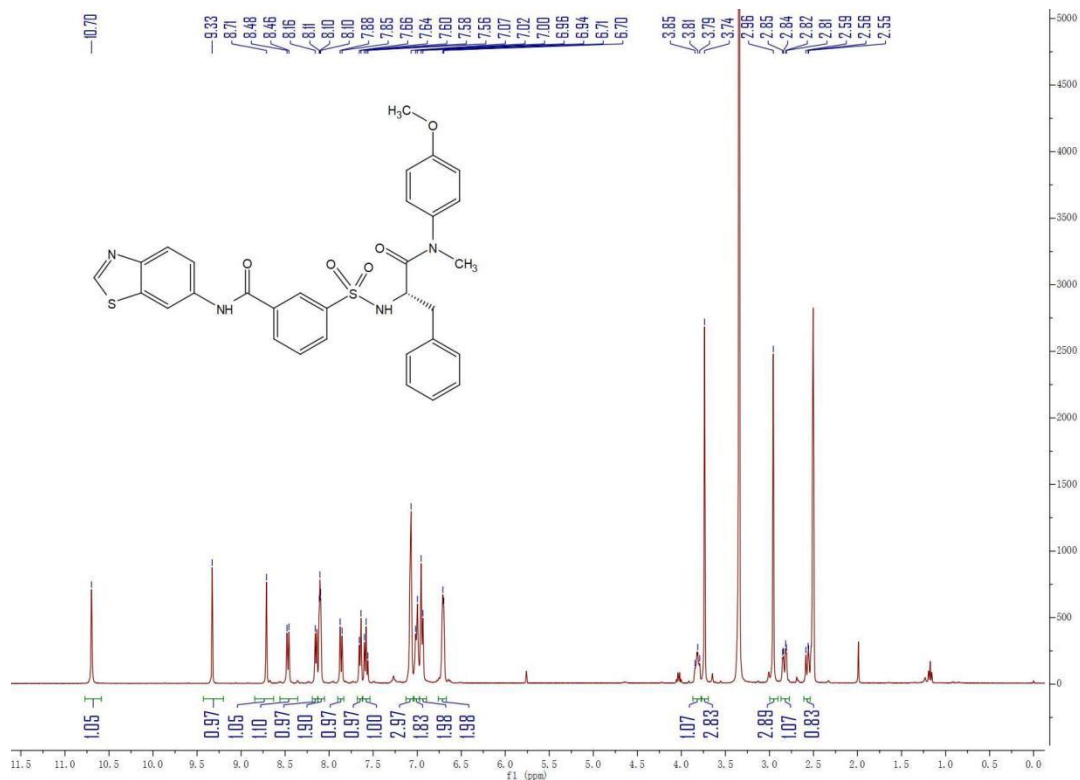

Fig.13:  $^1\text{H}$  NMR spectrum of I-10e

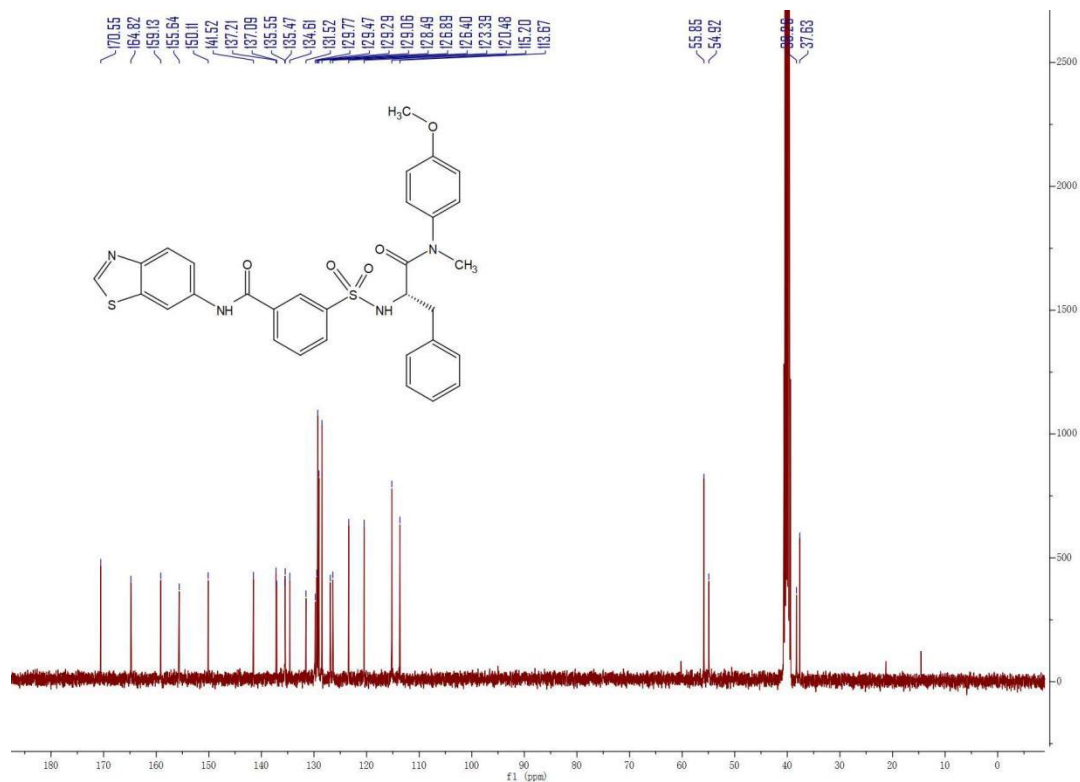

Fig. 14:  $^{13}\text{C}$  NMR spectrum of I-10e

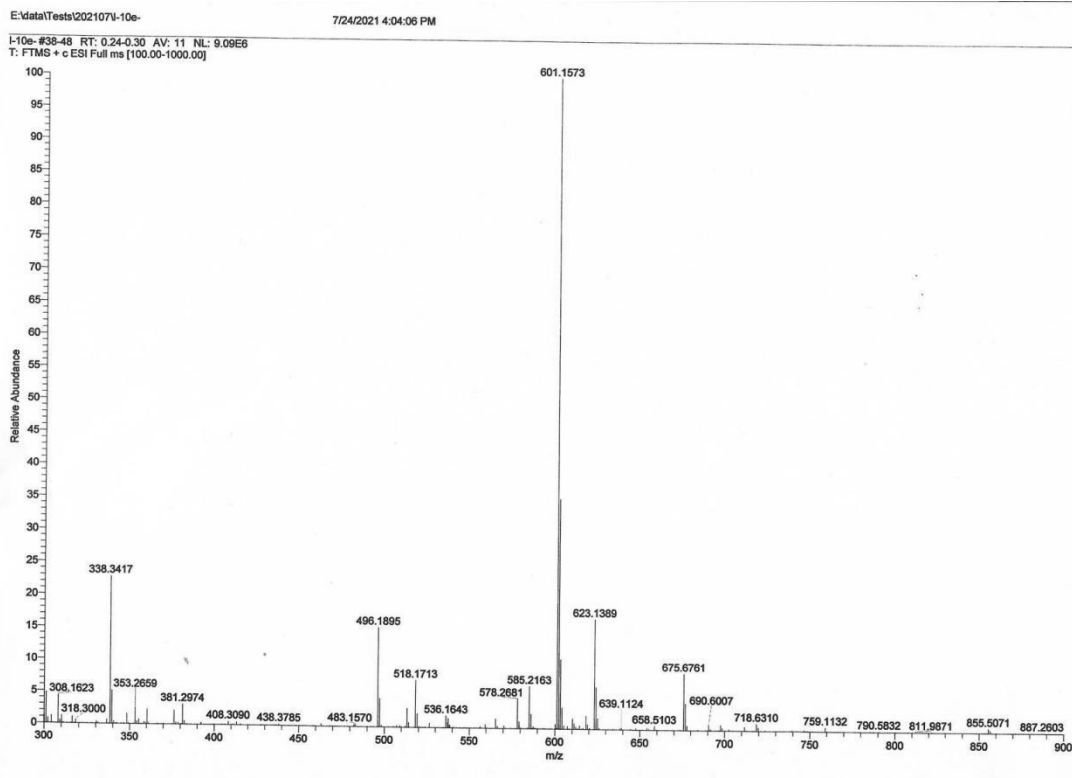

Fig. 15: HRMS spectrum of I-10e

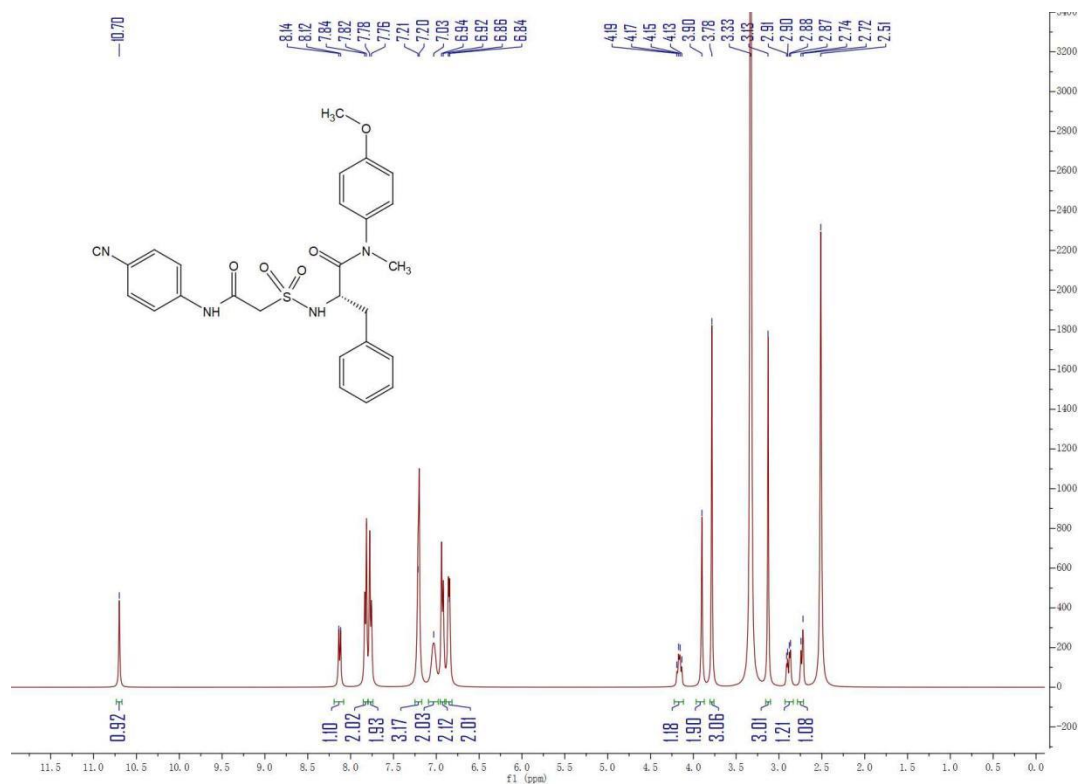

Fig.16: <sup>1</sup>H NMR spectrum of II-13a



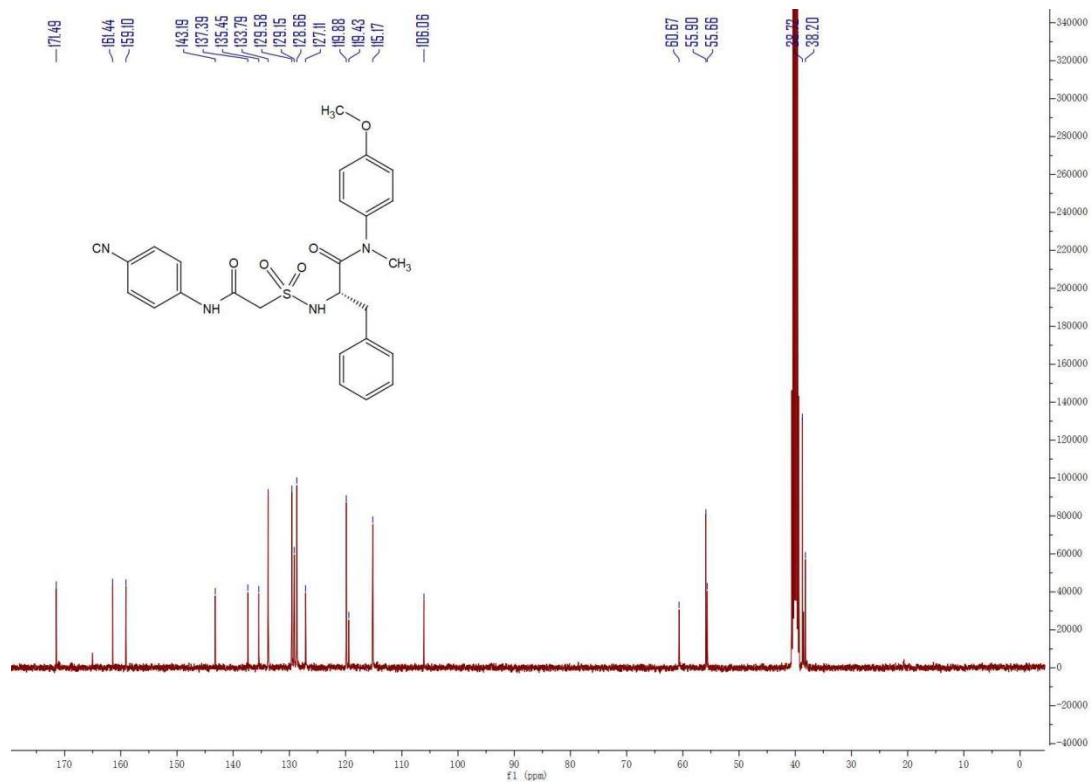

Fig. 17: <sup>13</sup>C NMR spectrum of II-13a

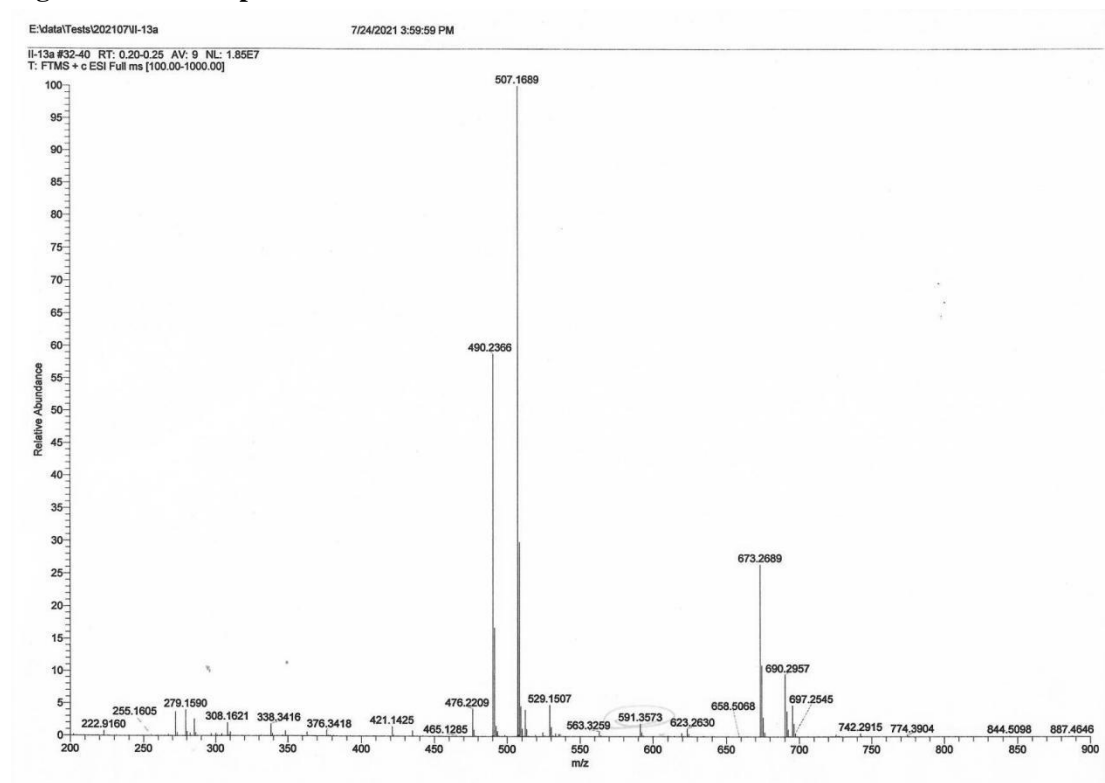

Fig. 18: HRMS spectrum of II-13a

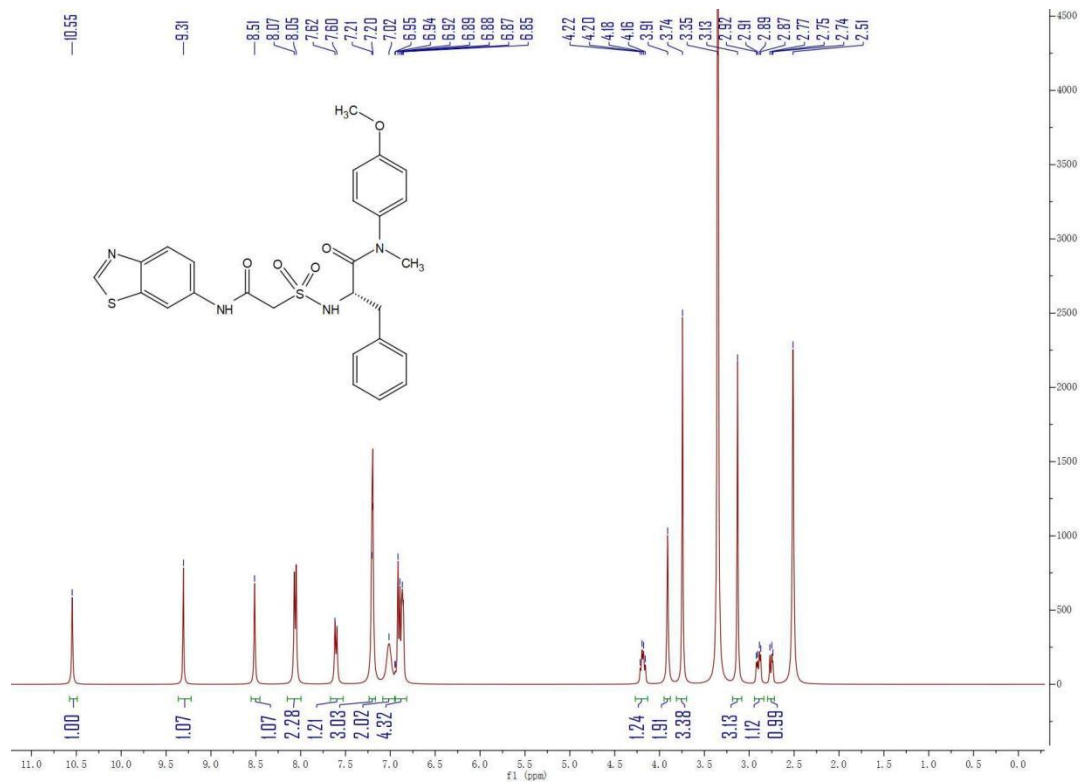

Fig.19: <sup>1</sup>H NMR spectrum of II-13b

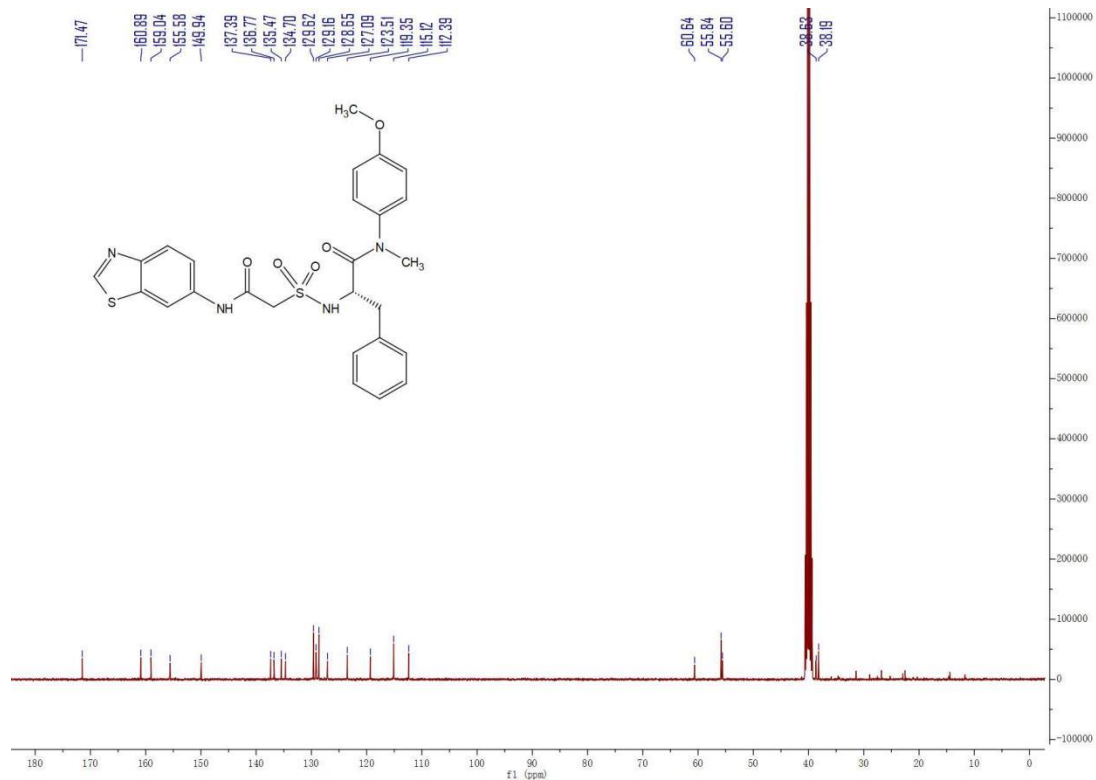

Fig. 20: <sup>13</sup>C NMR spectrum of II-13b

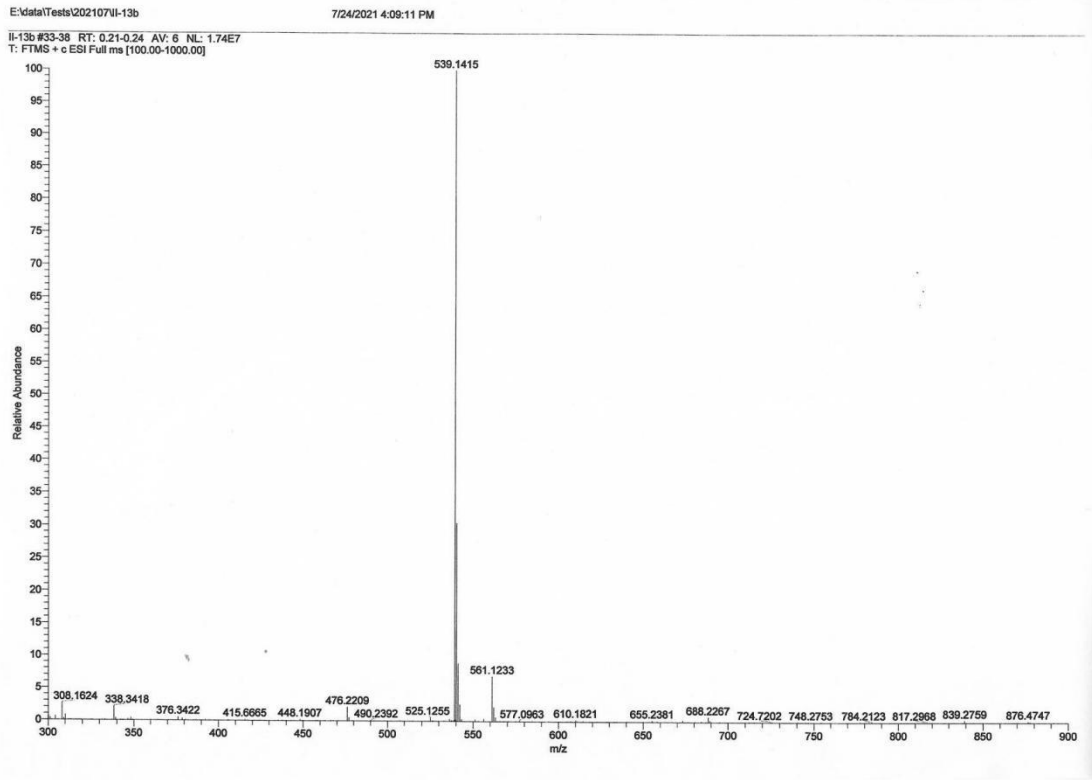

Fig. 21: HRMS spectrum of II-13b

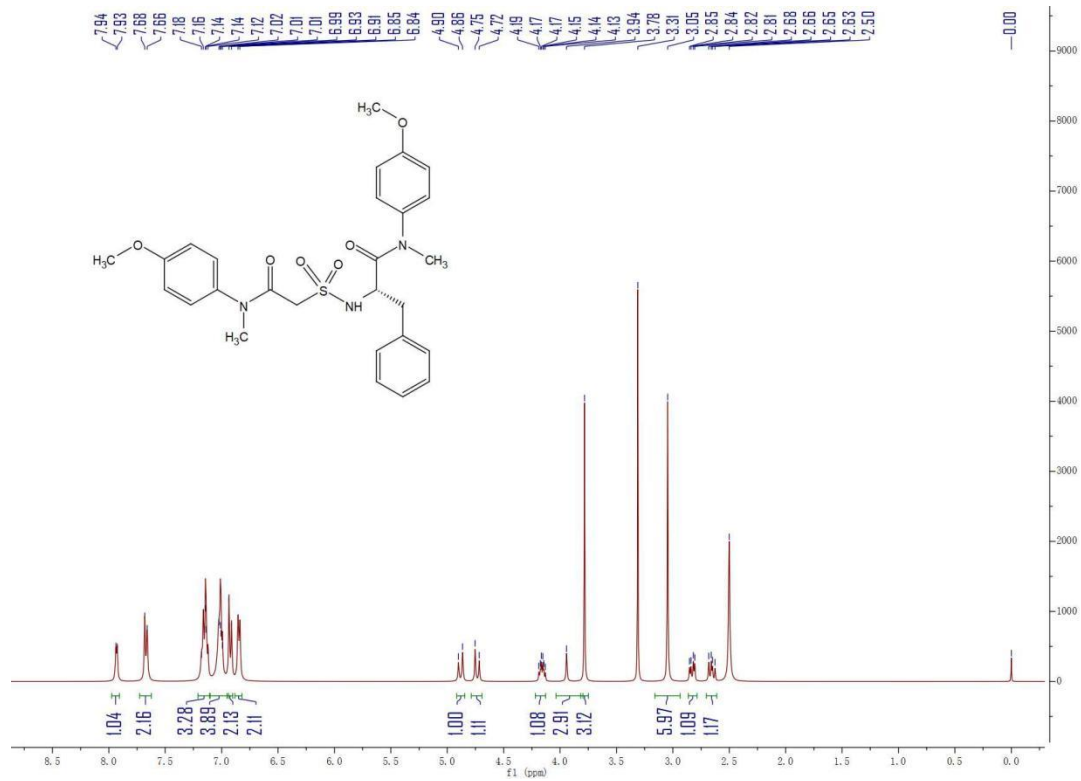

Fig.22: <sup>1</sup>H NMR spectrum of II-13c

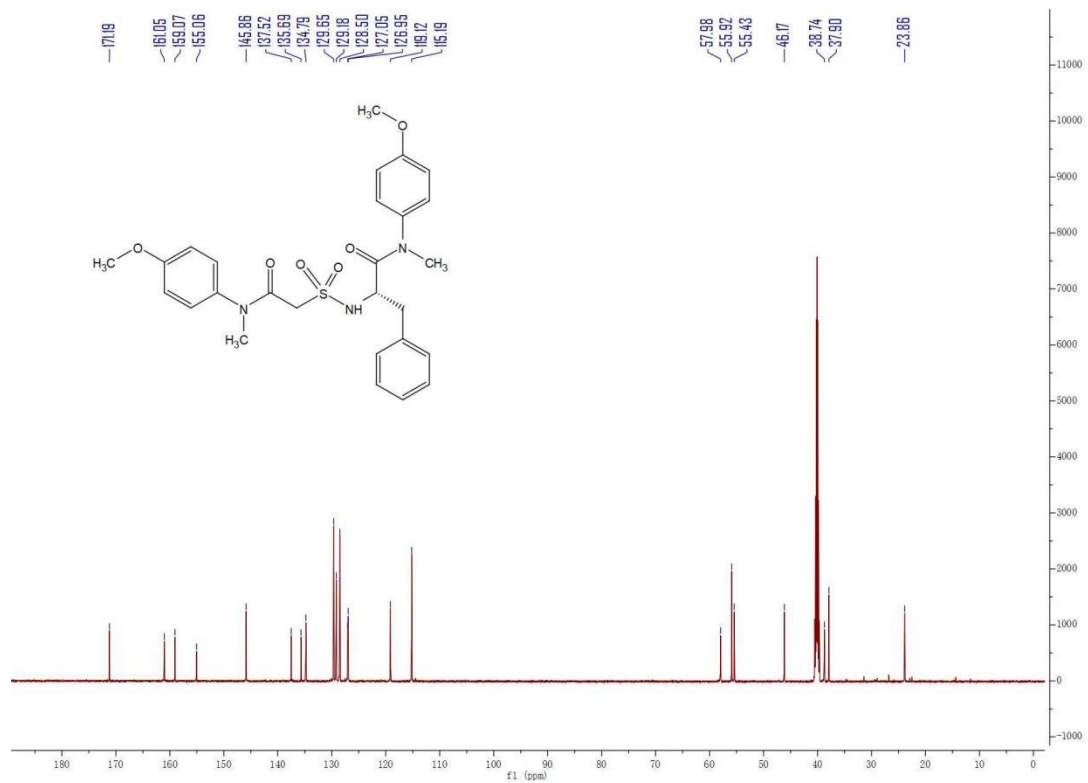

Fig. 23: <sup>13</sup>C NMR spectrum of II-13c

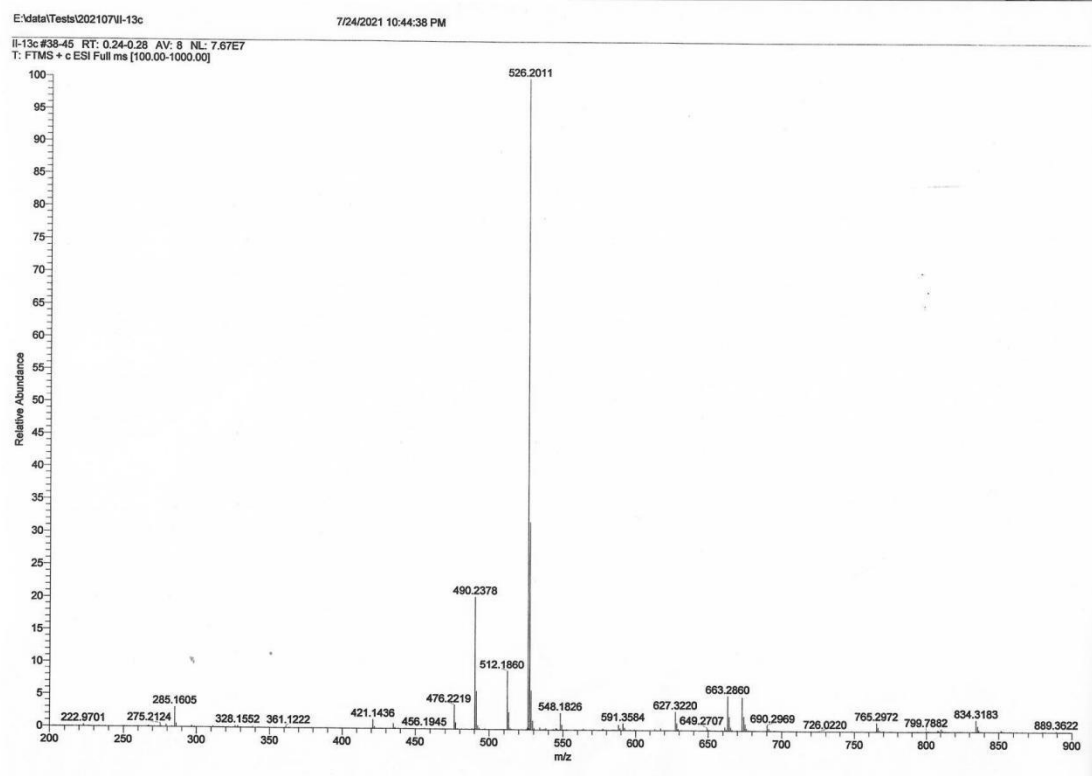

Fig. 24: HRMS spectrum of II-13c

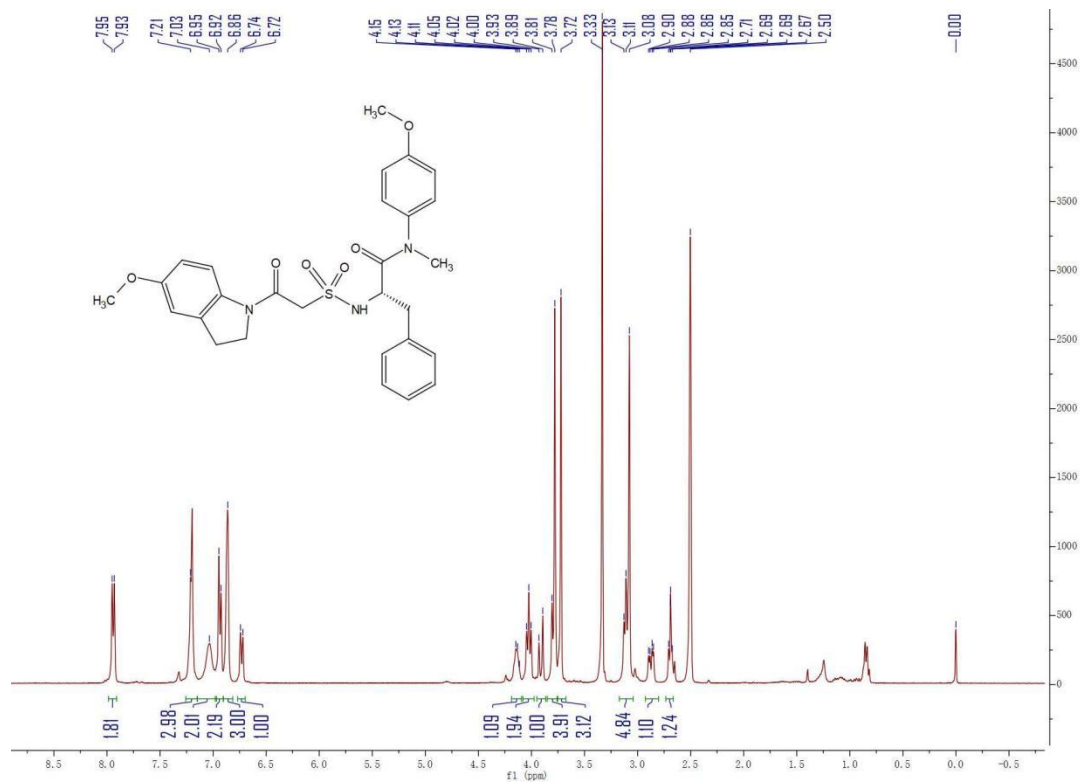

Fig.25: <sup>1</sup>H NMR spectrum of II-13d

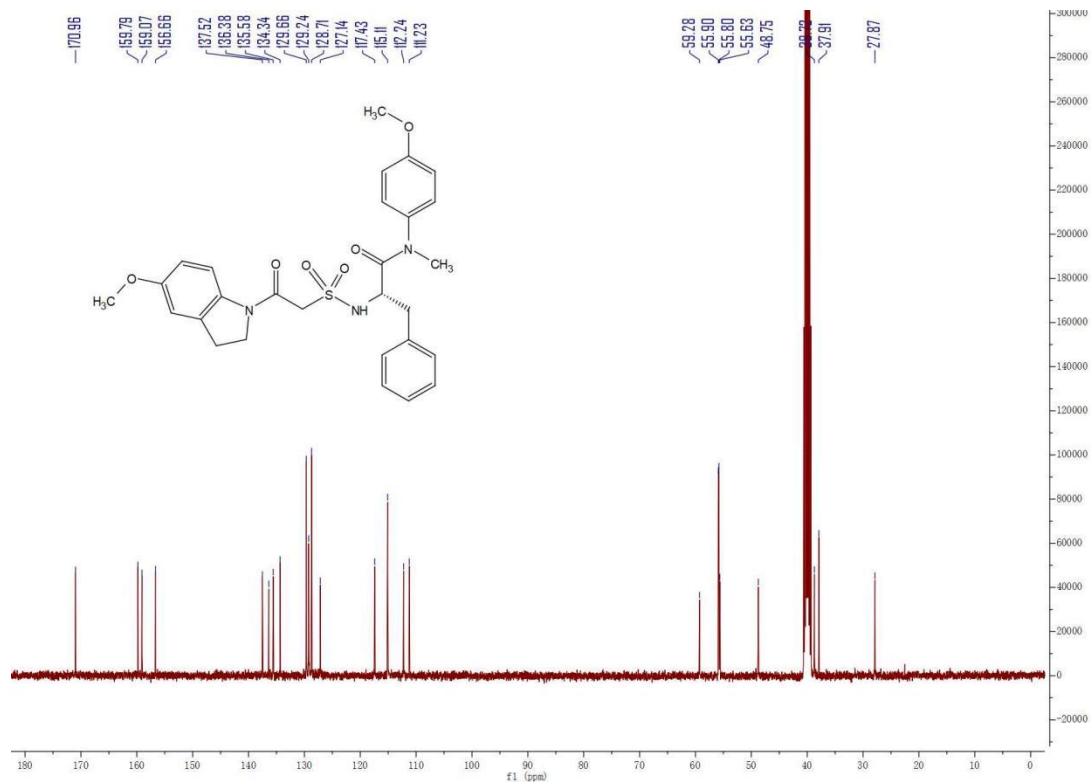

Fig. 26: <sup>13</sup>C NMR spectrum of II-13d

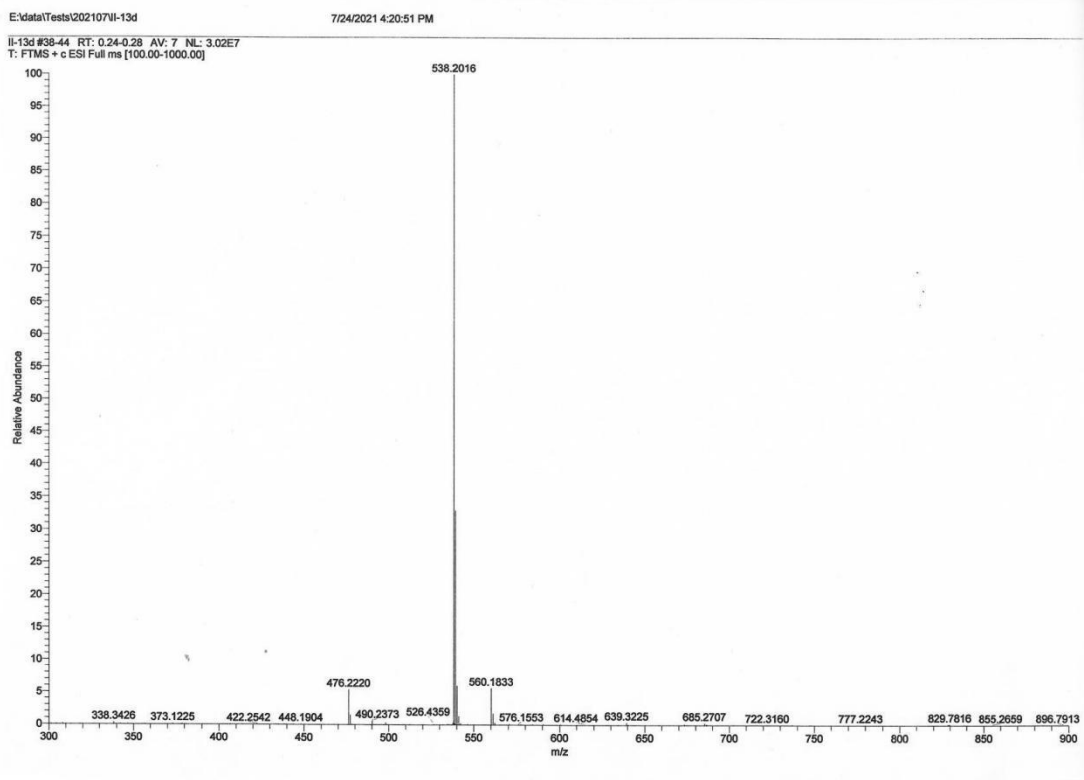

Fig. 27: HRMS spectrum of II-13d

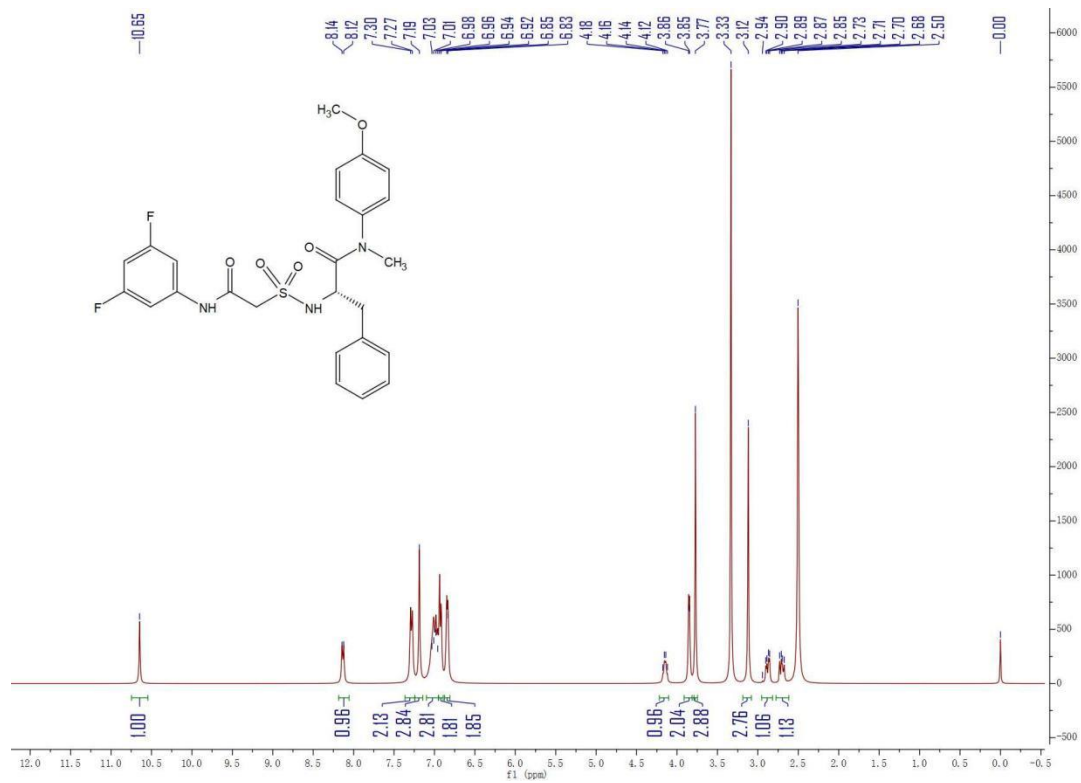

Fig.28: <sup>1</sup>H NMR spectrum of II-13e

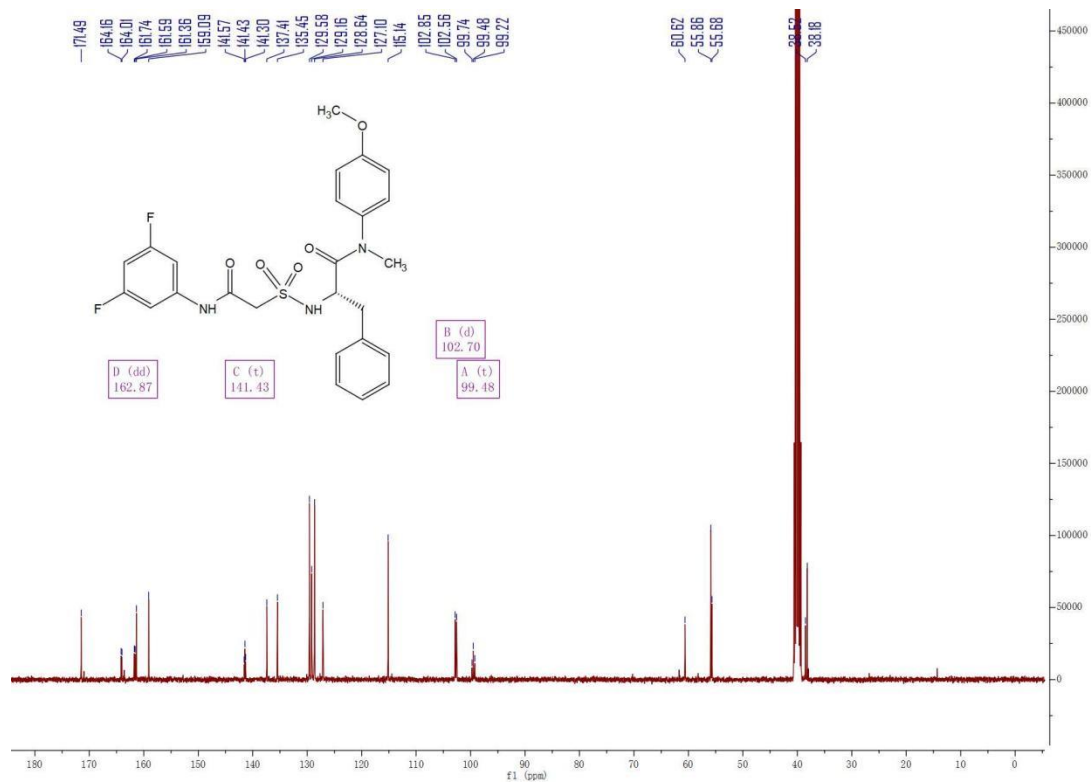

Fig. 29:  $^{13}\text{C}$  NMR spectrum of II-13e

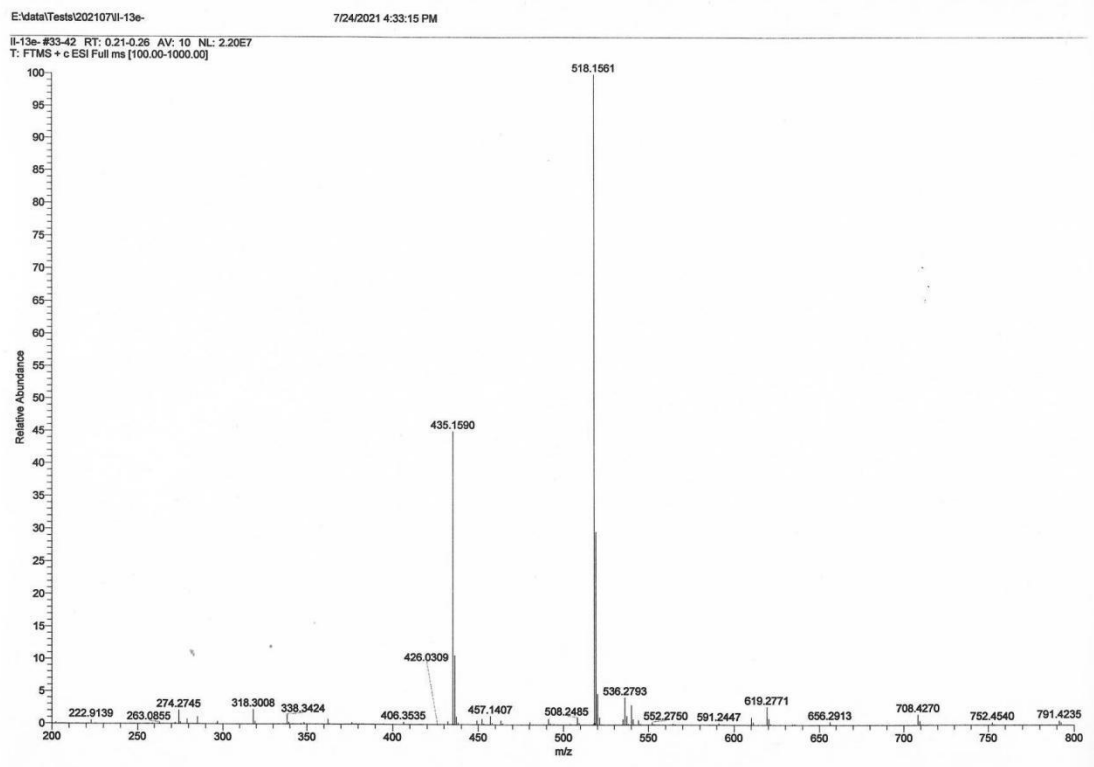

Fig. 30: HRMS spectrum of II-13e

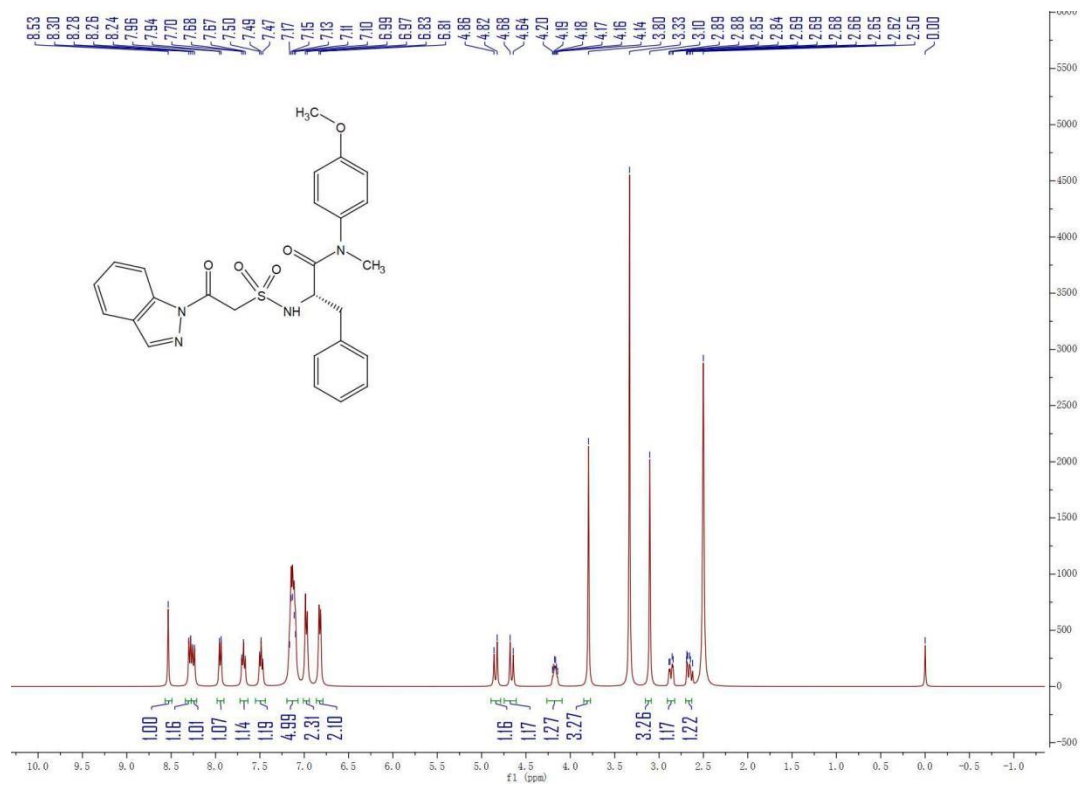

Fig.31: <sup>1</sup>H NMR spectrum of II-13f

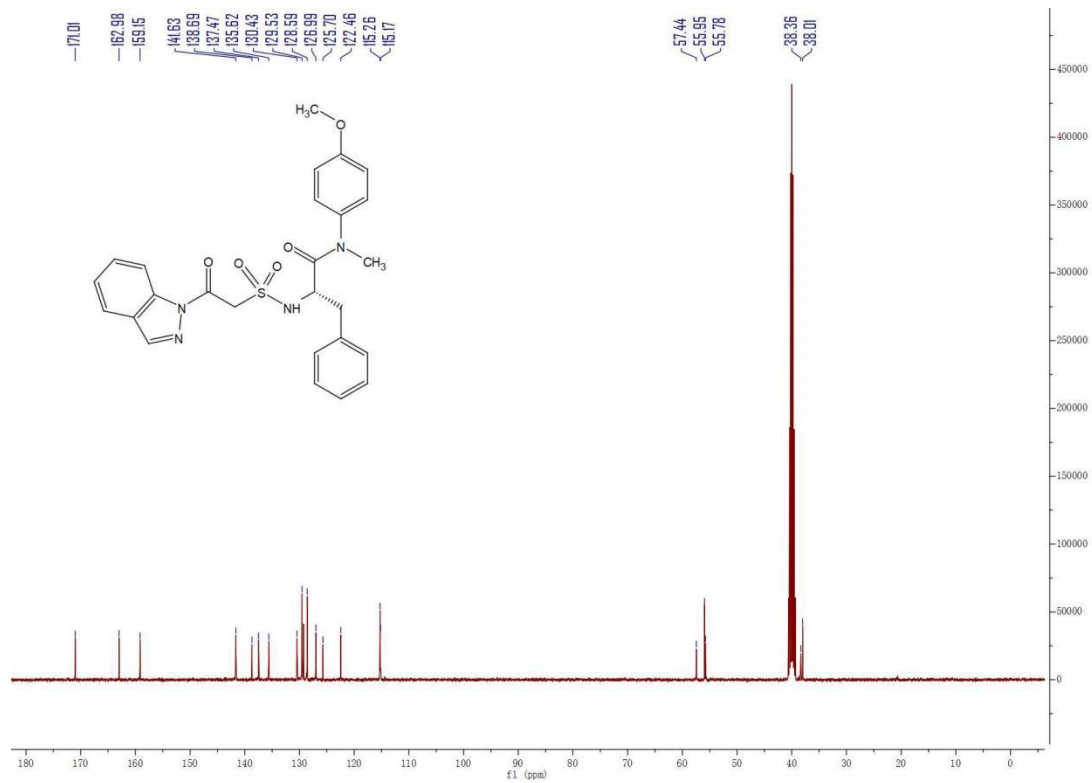

Fig. 32: <sup>13</sup>C NMR spectrum of II-13f



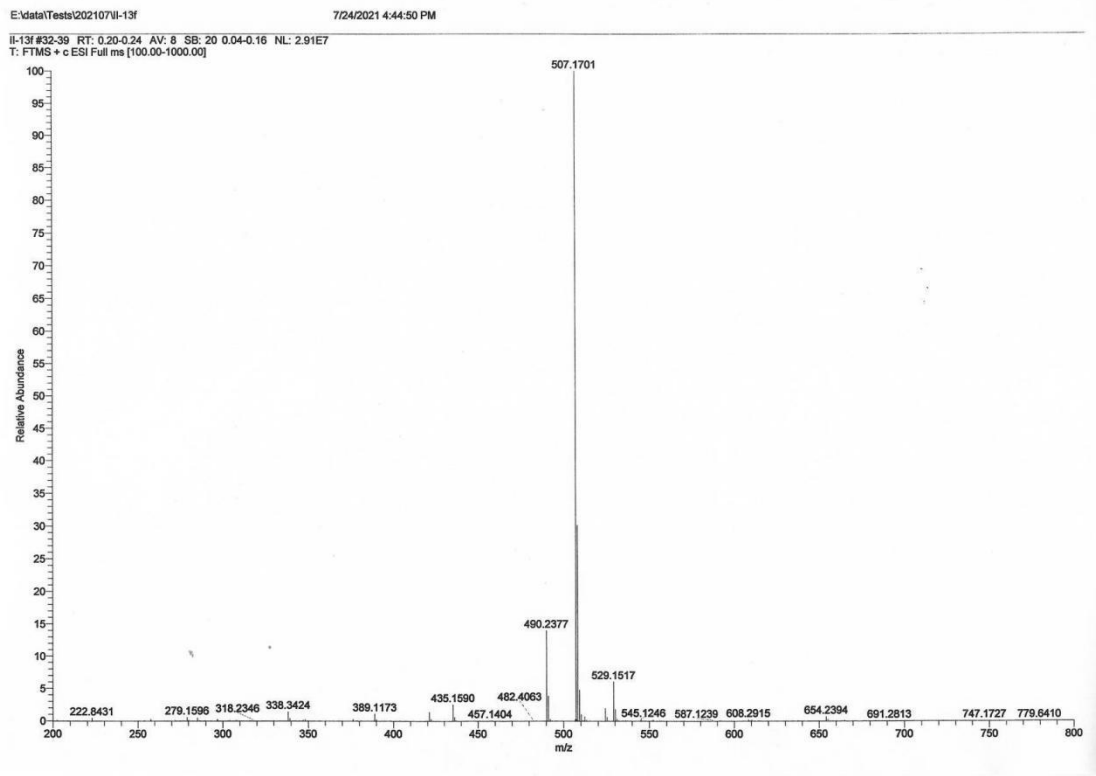

Fig. 33: HRMS spectrum of II-13f

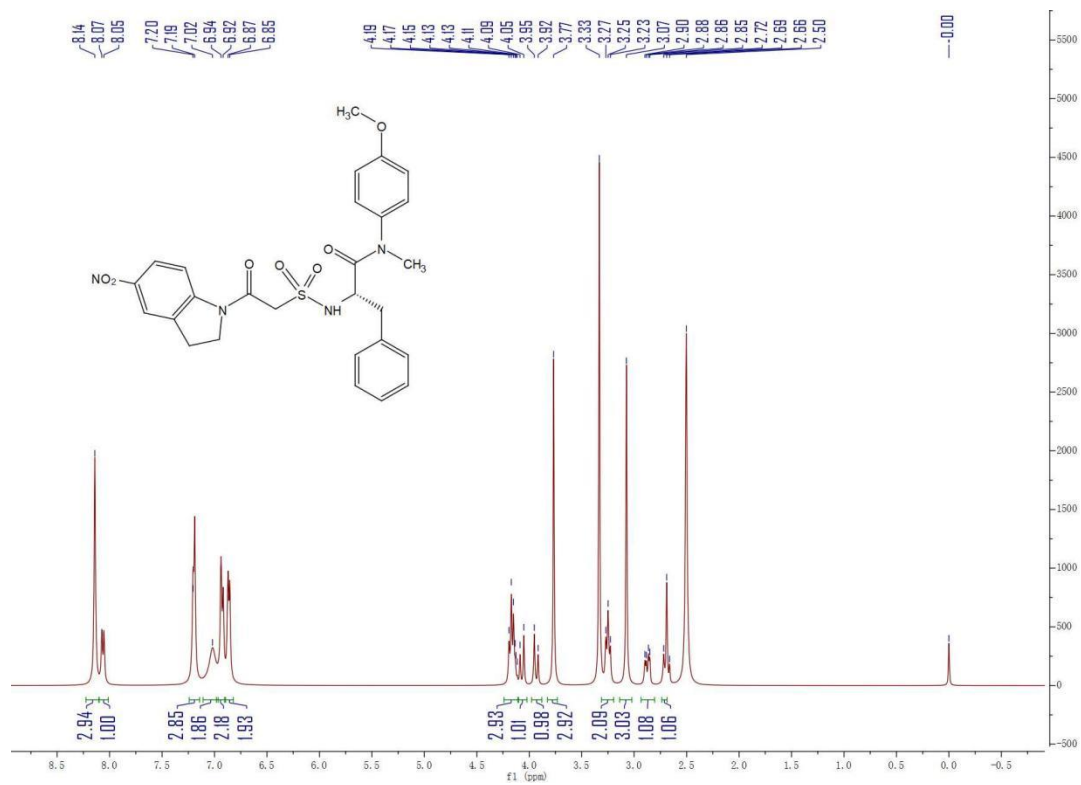

Fig. 34: <sup>1</sup>H NMR spectrum of II-13g

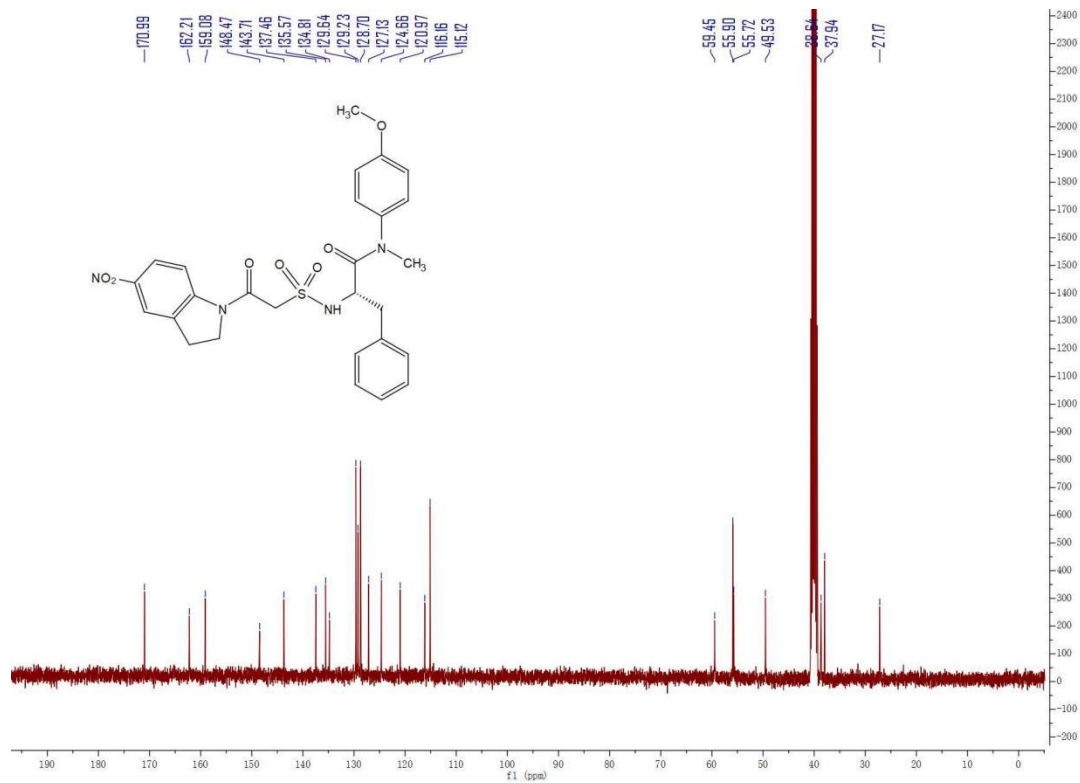

Fig. 35:  $^{13}\text{C}$  NMR spectrum of II-13g

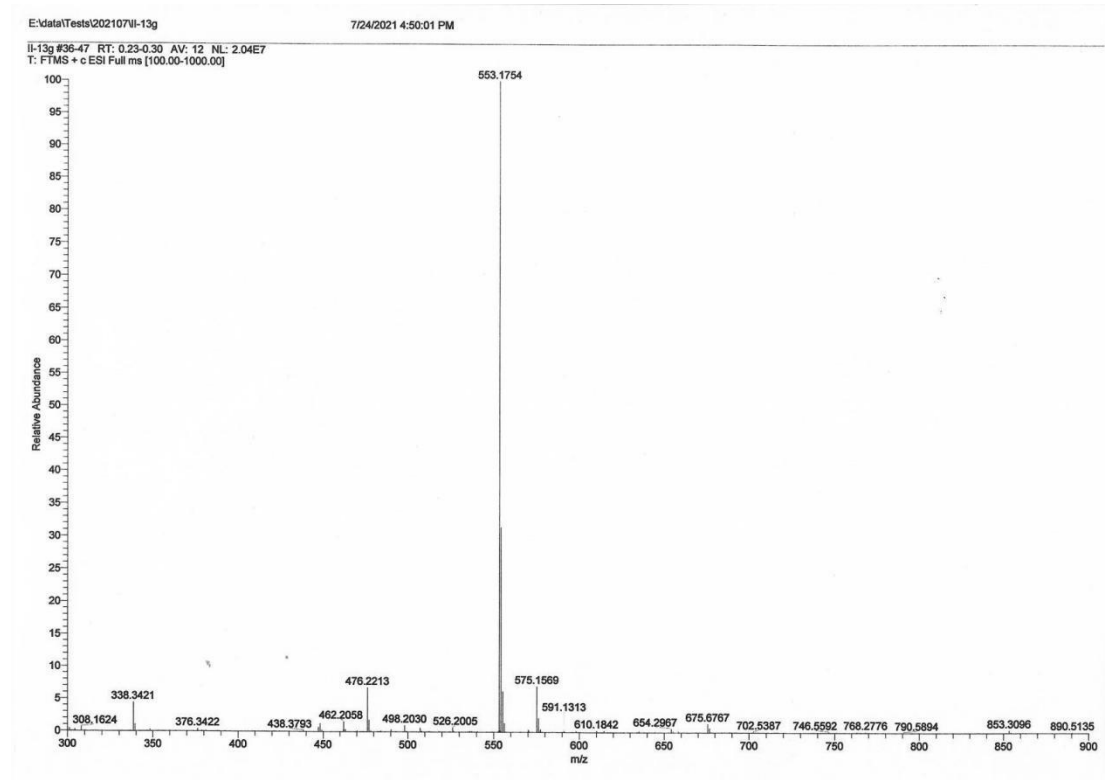

Fig. 36: HRMS spectrum of II-13g

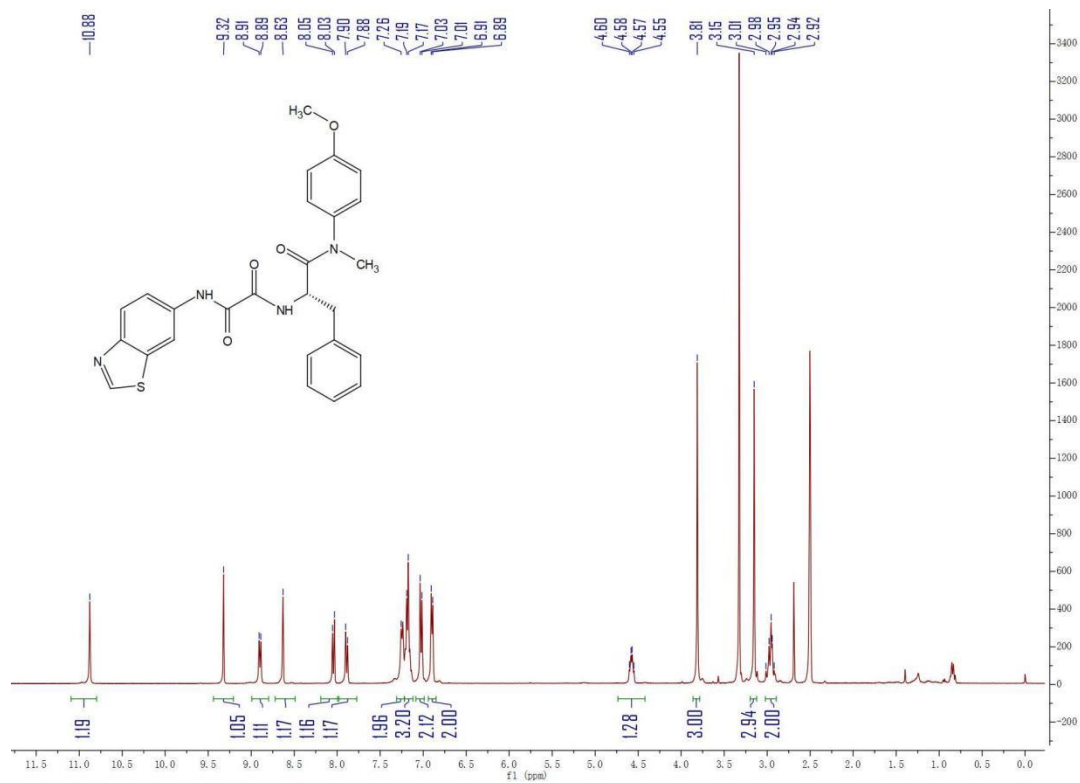

Fig. 37: <sup>1</sup>H NMR spectrum of III-16a

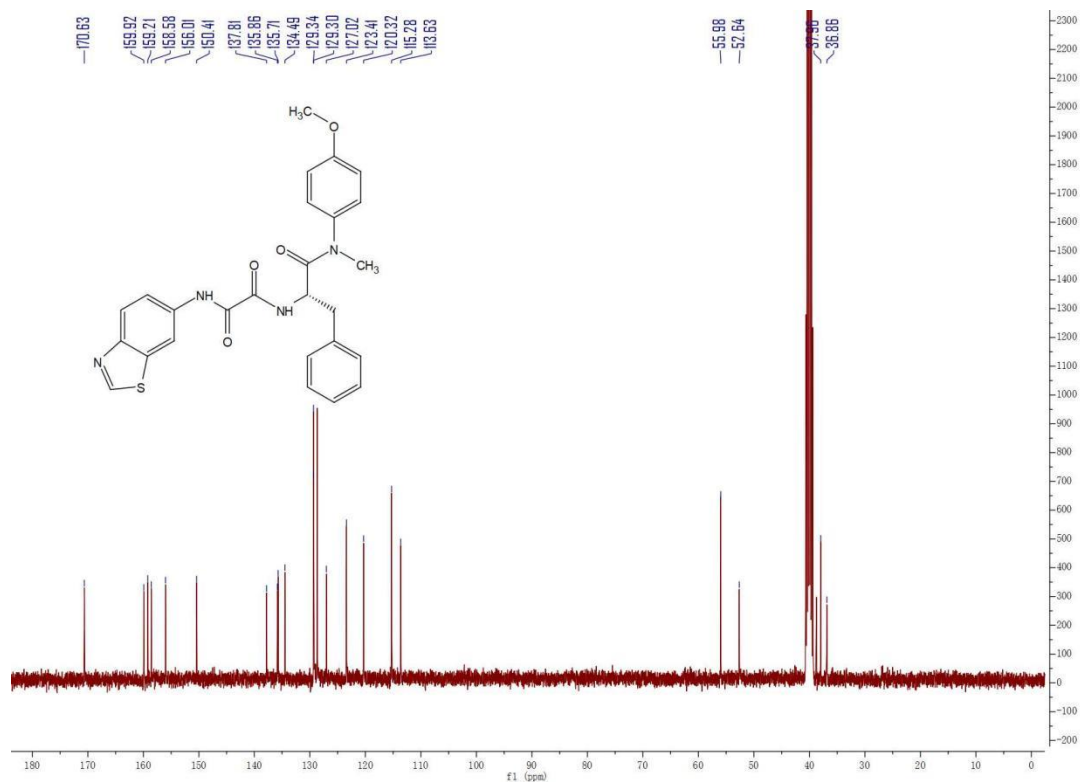

Fig. 38: <sup>13</sup>C NMR spectrum of III-16a

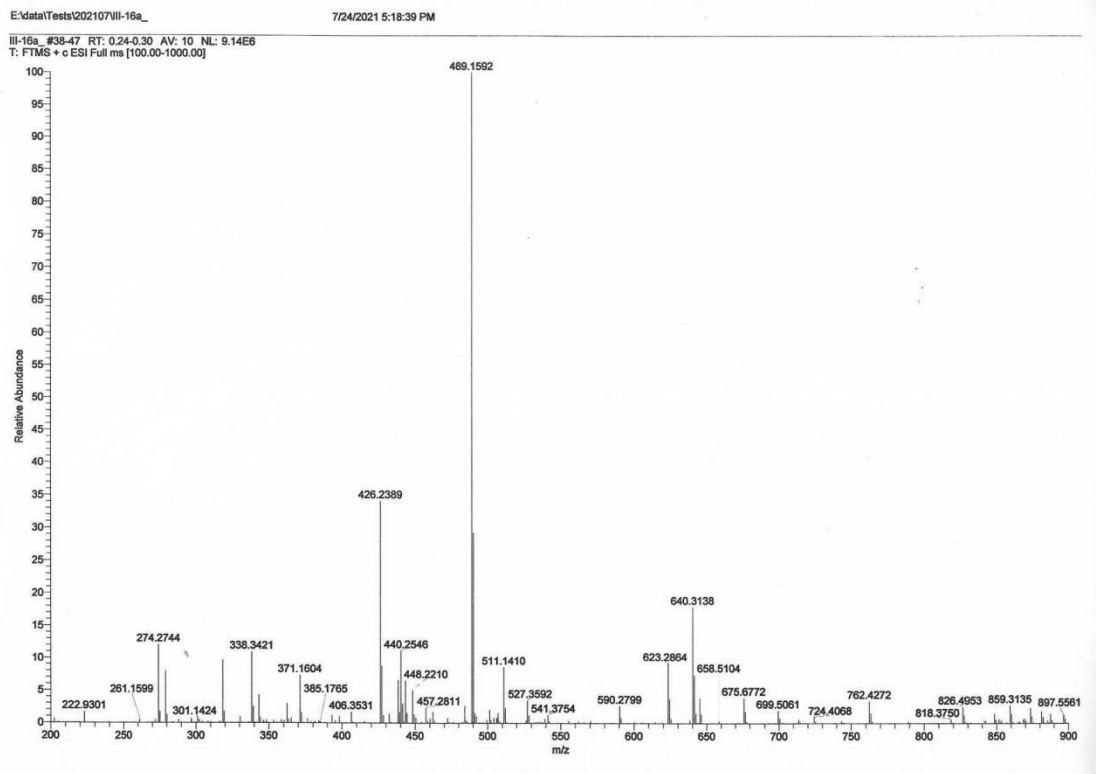

Fig. 39: HRMS spectrum of III-16a

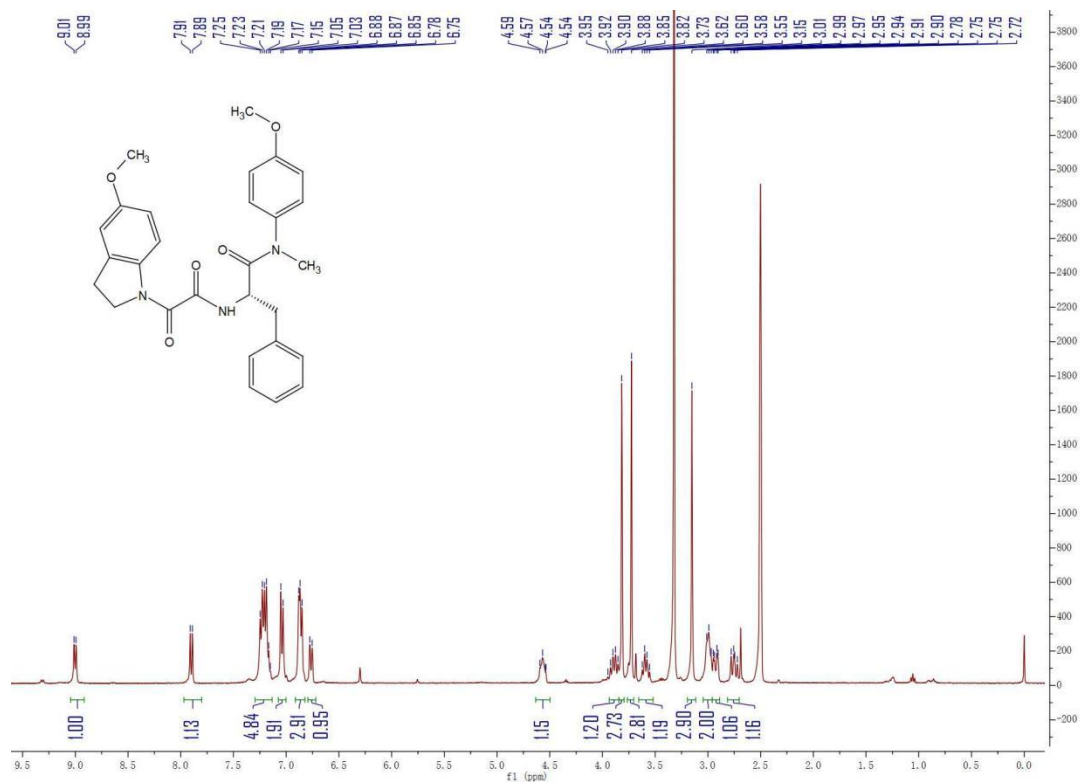

Fig. 40: <sup>1</sup>H NMR spectrum of III-16b

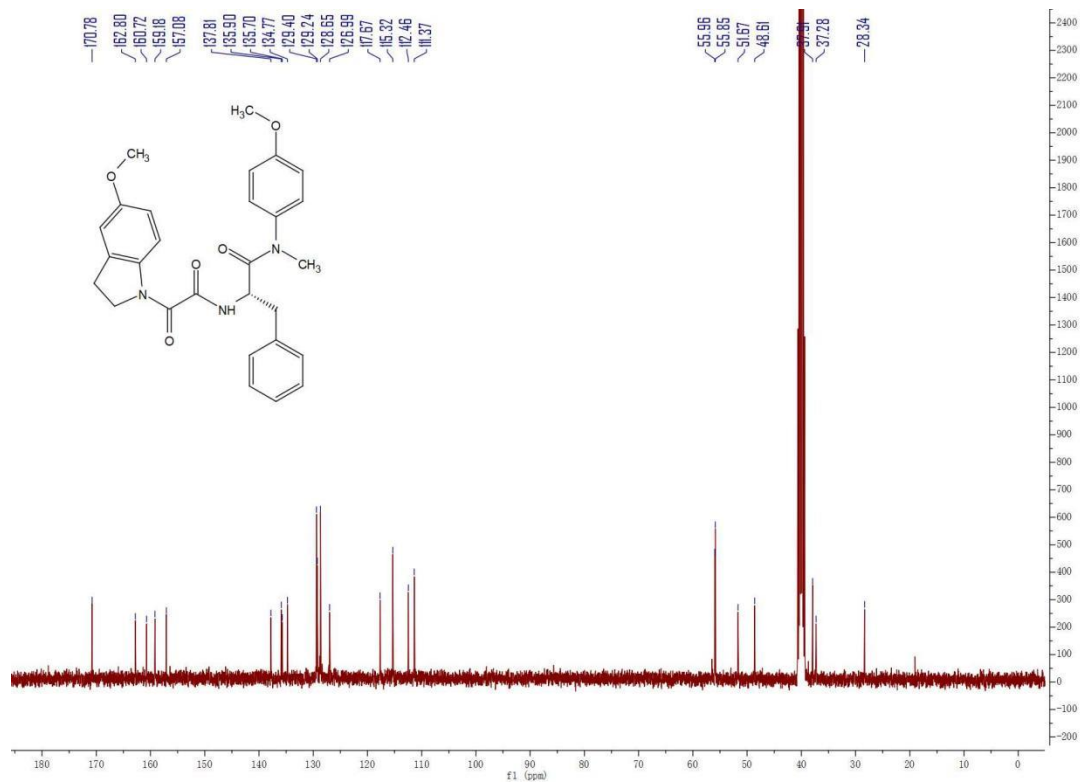

Fig. 41:  $^{13}\text{C}$  NMR spectrum of III-16b

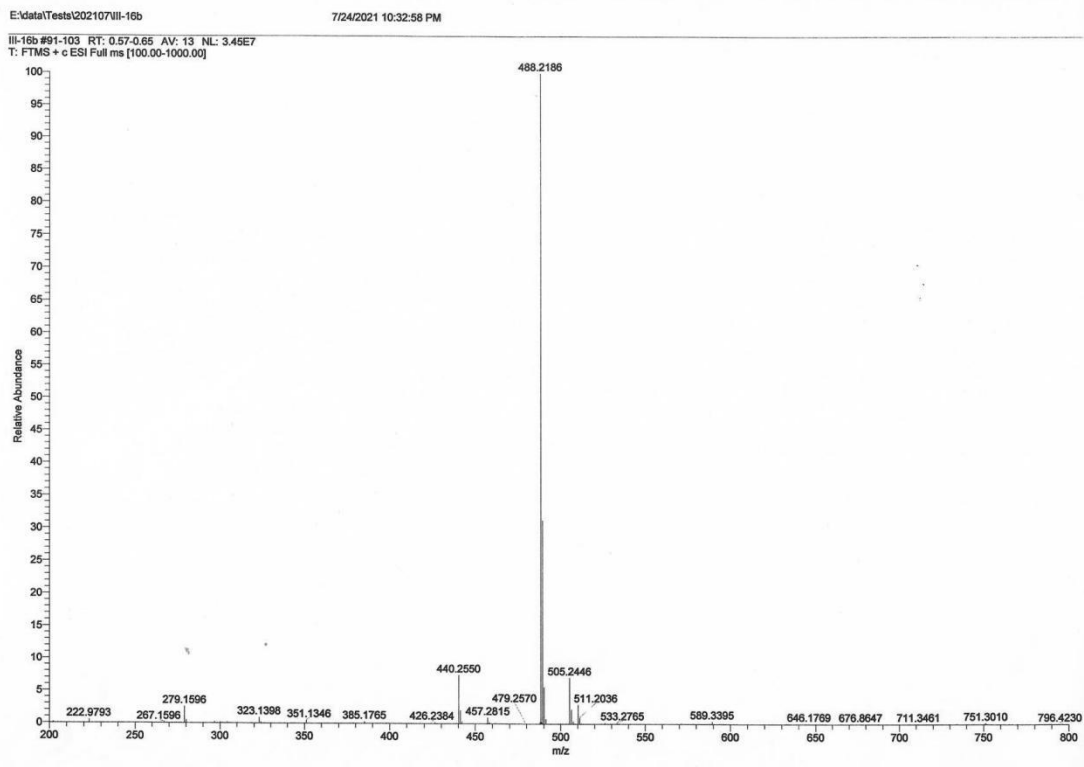

Fig. 42: HRMS spectrum of III-16b

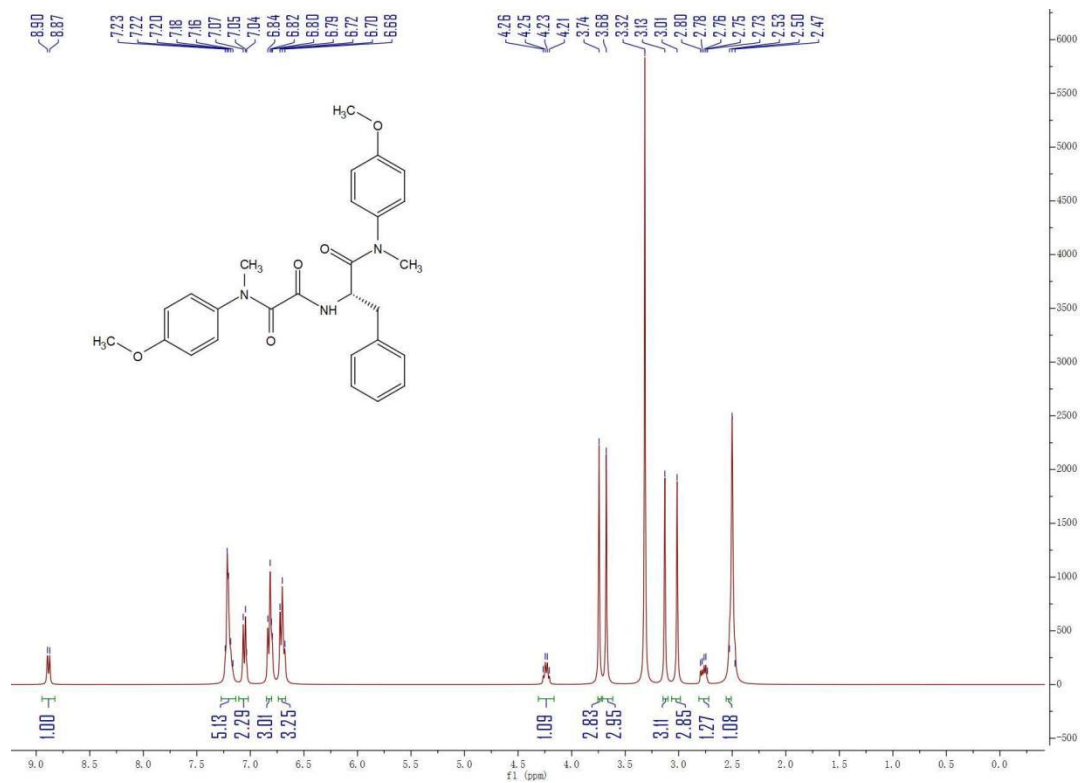

Fig. 43:  $^1\text{H}$  NMR spectrum of III-16c

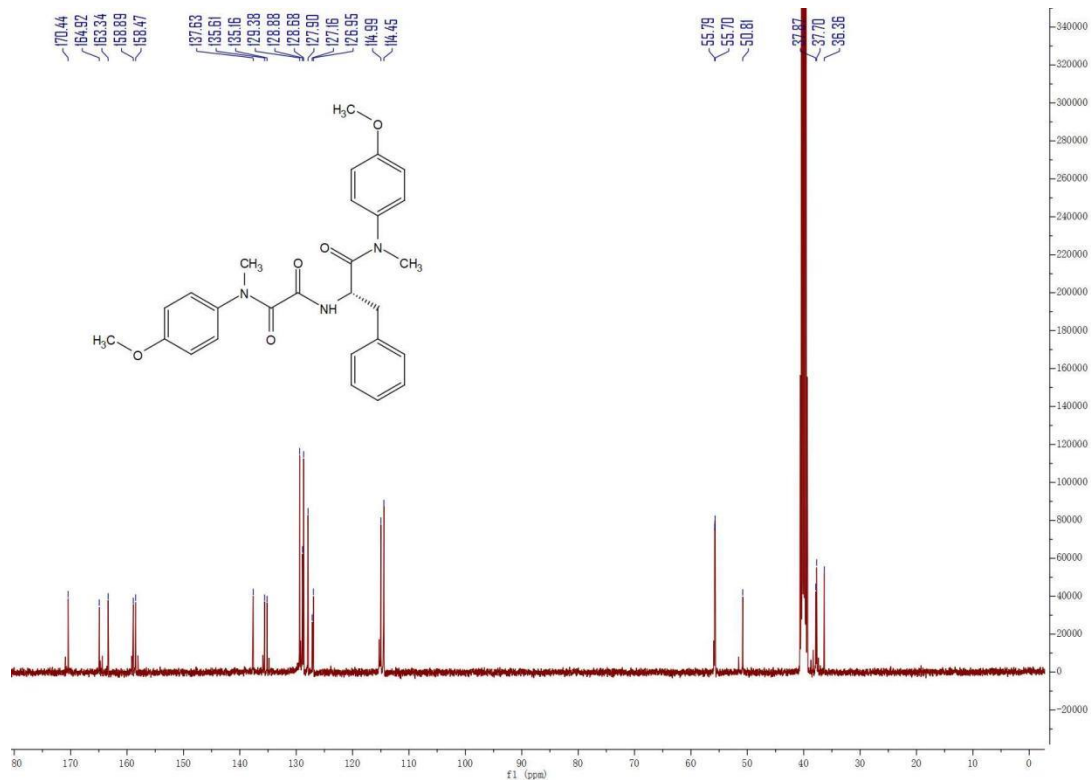

Fig. 44:  $^{13}\text{C}$  NMR spectrum of III-16c

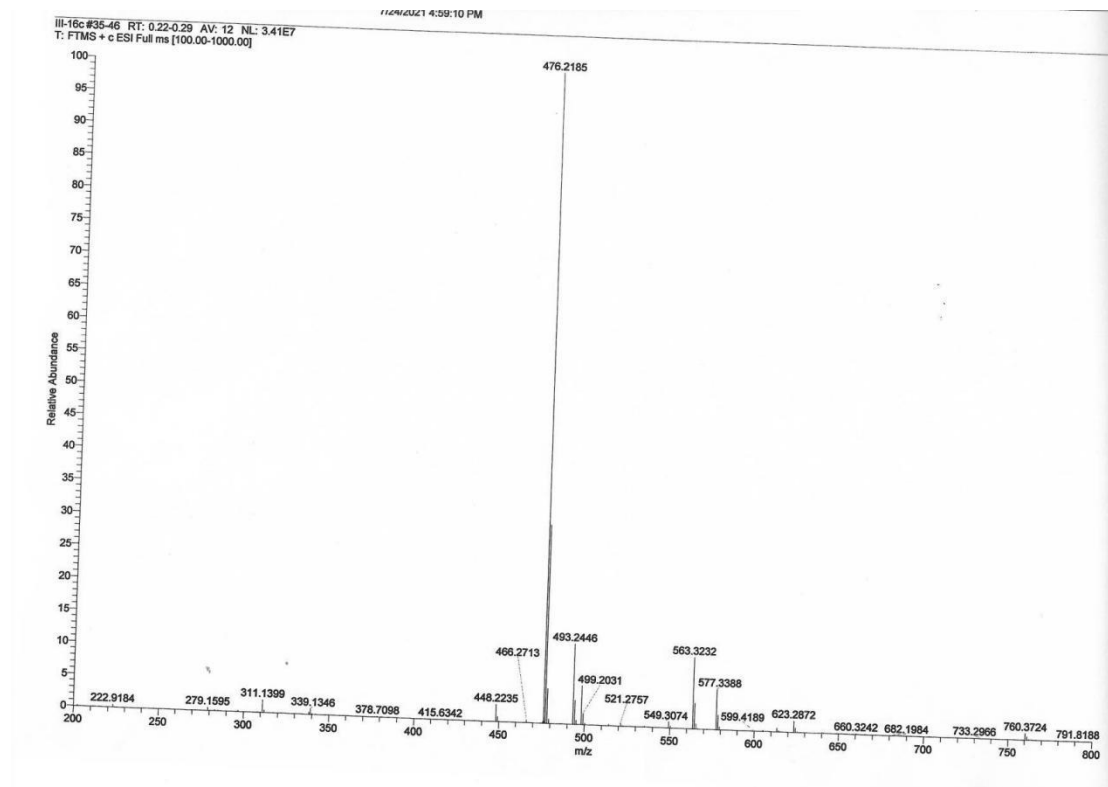

Fig. 45: HRMS spectrum of III-16c

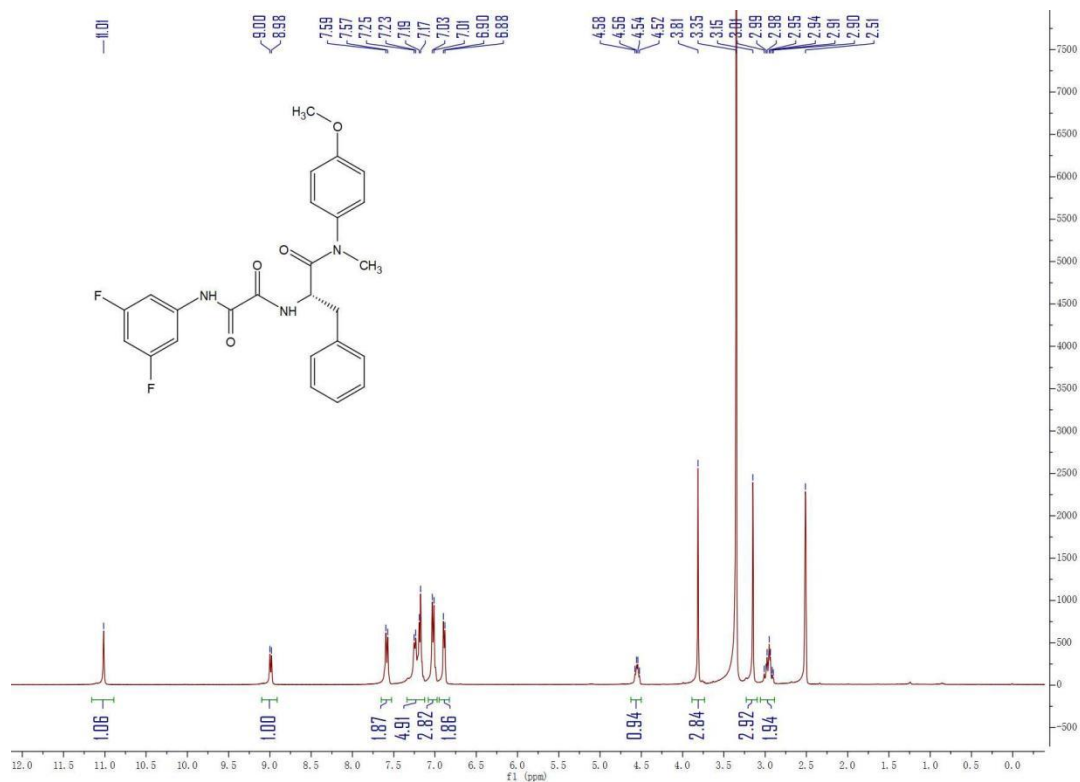

Fig. 46:  $^1\text{H}$  NMR spectrum of III-16d

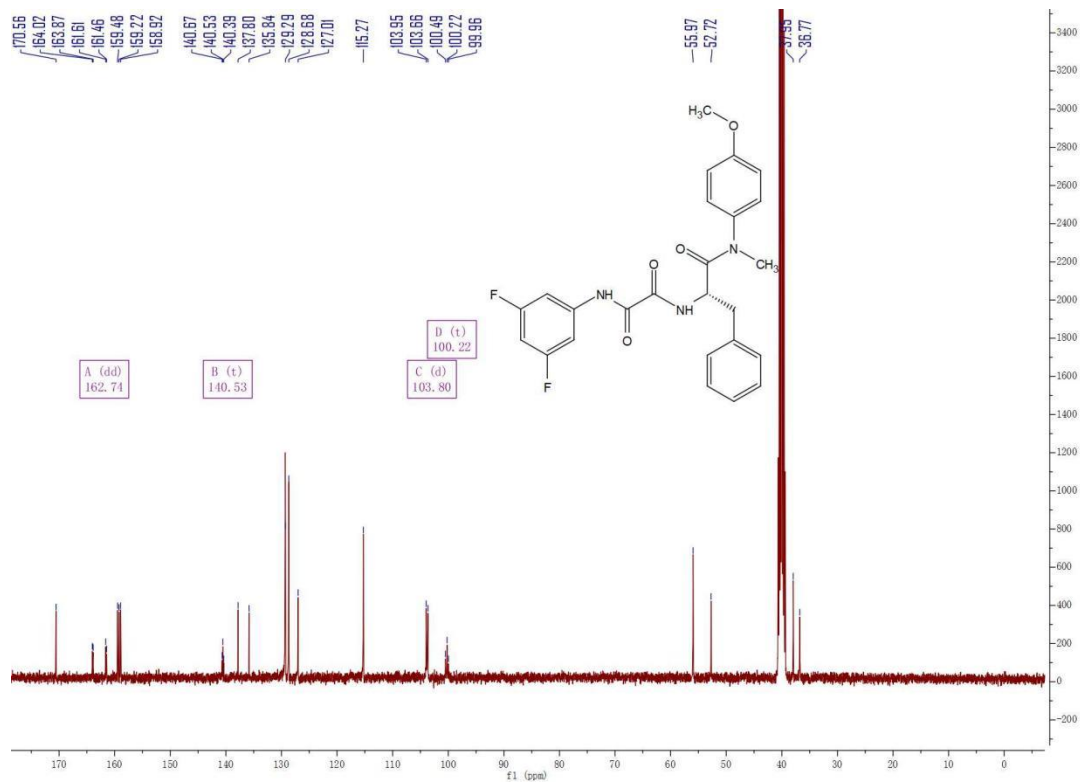

Fig. 47: <sup>13</sup>C NMR spectrum of III-16d

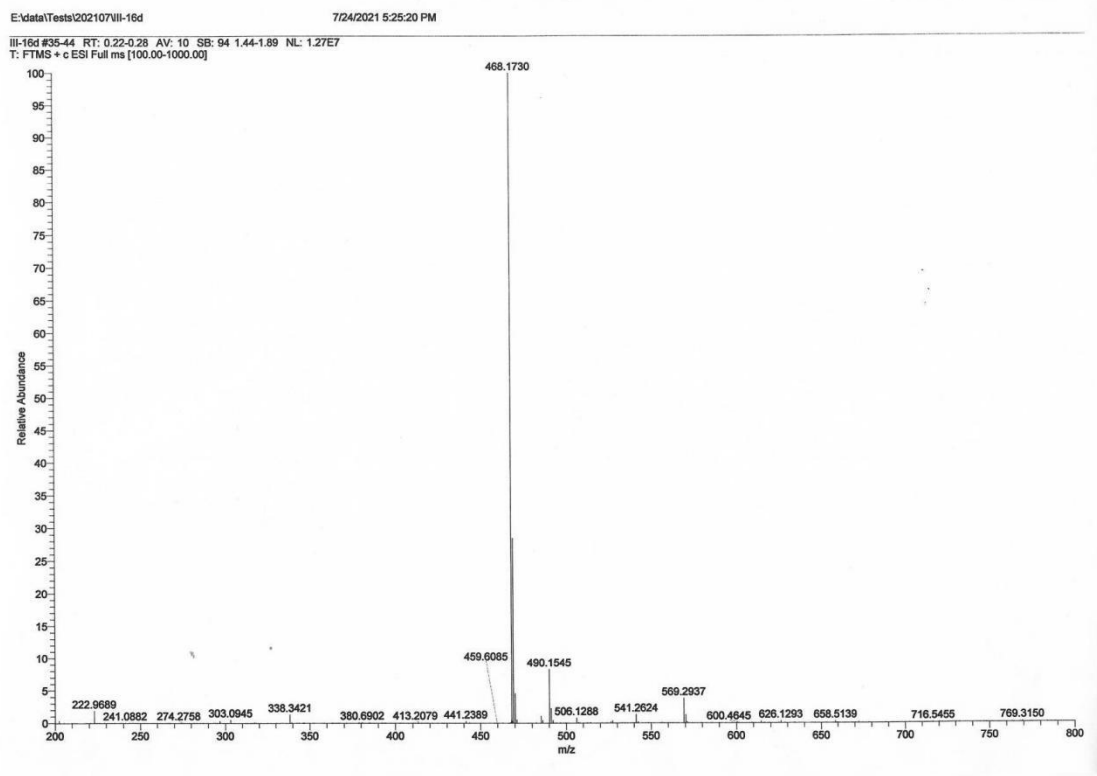

Fig. 48: <sup>13</sup>C NMR spectrum of III-16d



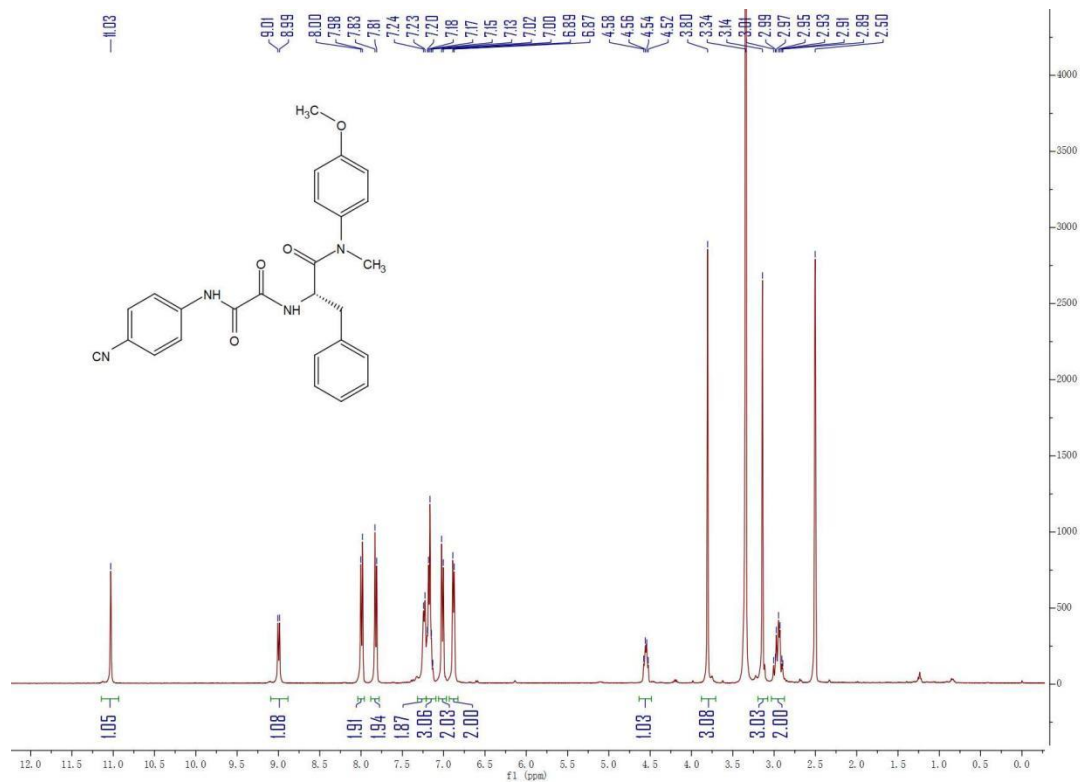

Fig. 49:  $^1\text{H}$  NMR spectrum of III-16e

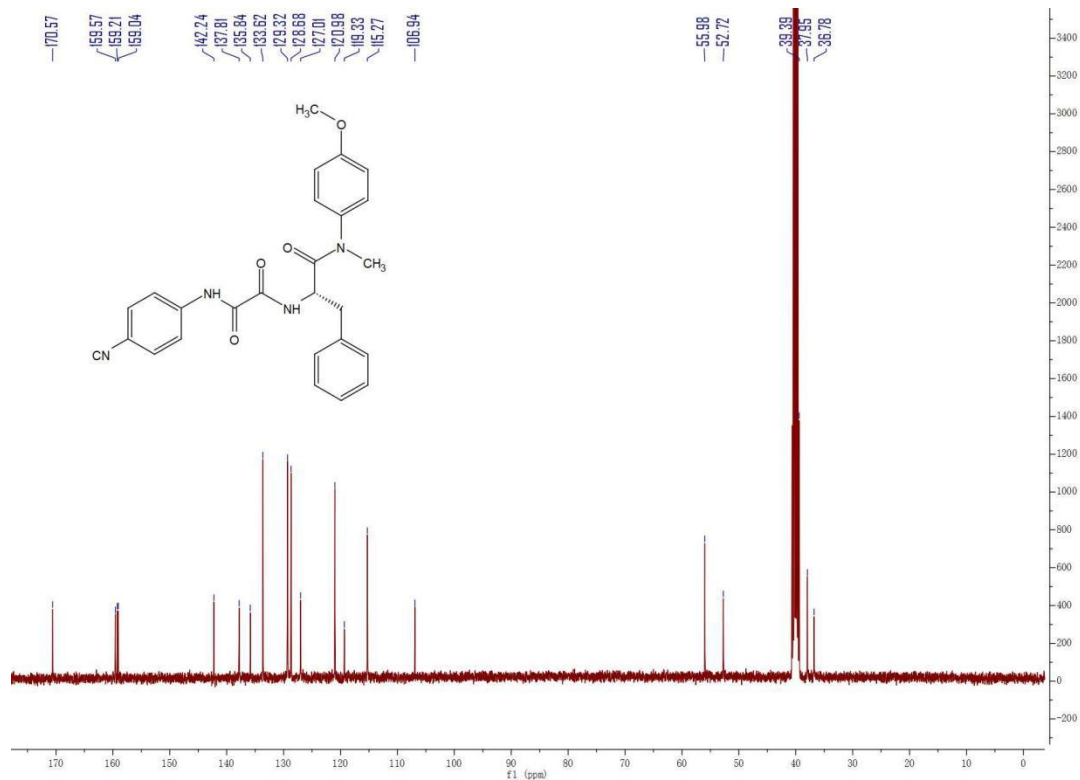

Fig. 50:  $^{13}\text{C}$  NMR spectrum of III-16e

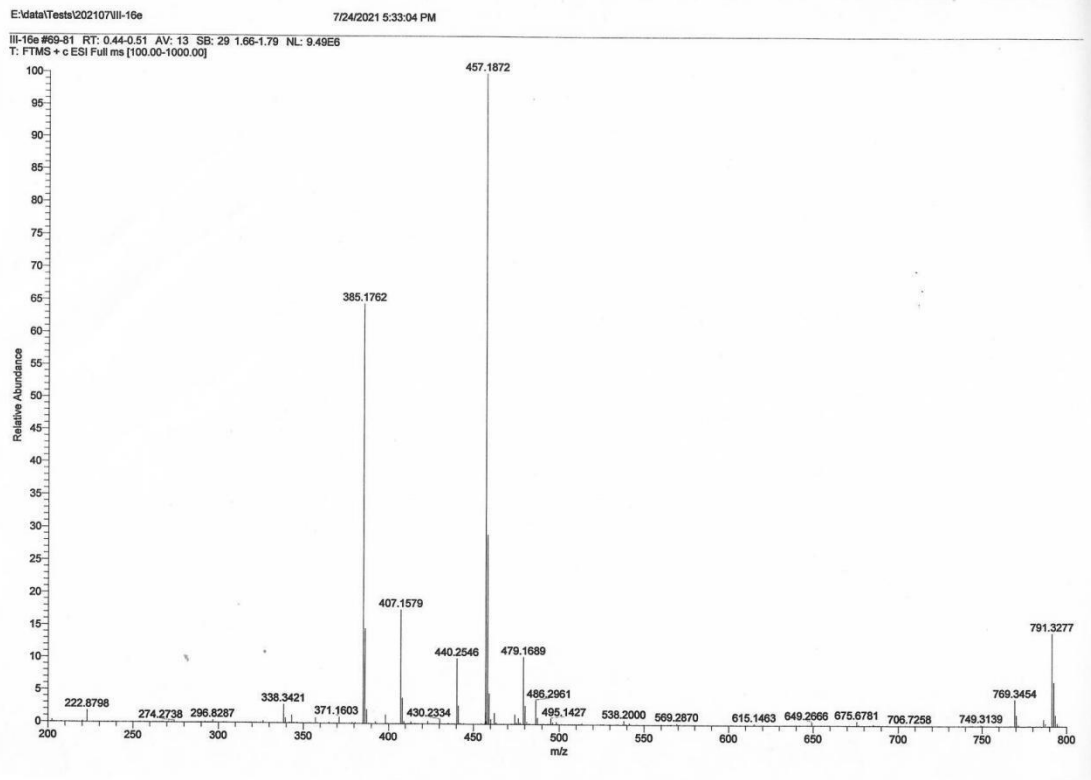

Fig. 51: HRMS spectrum of III-16e

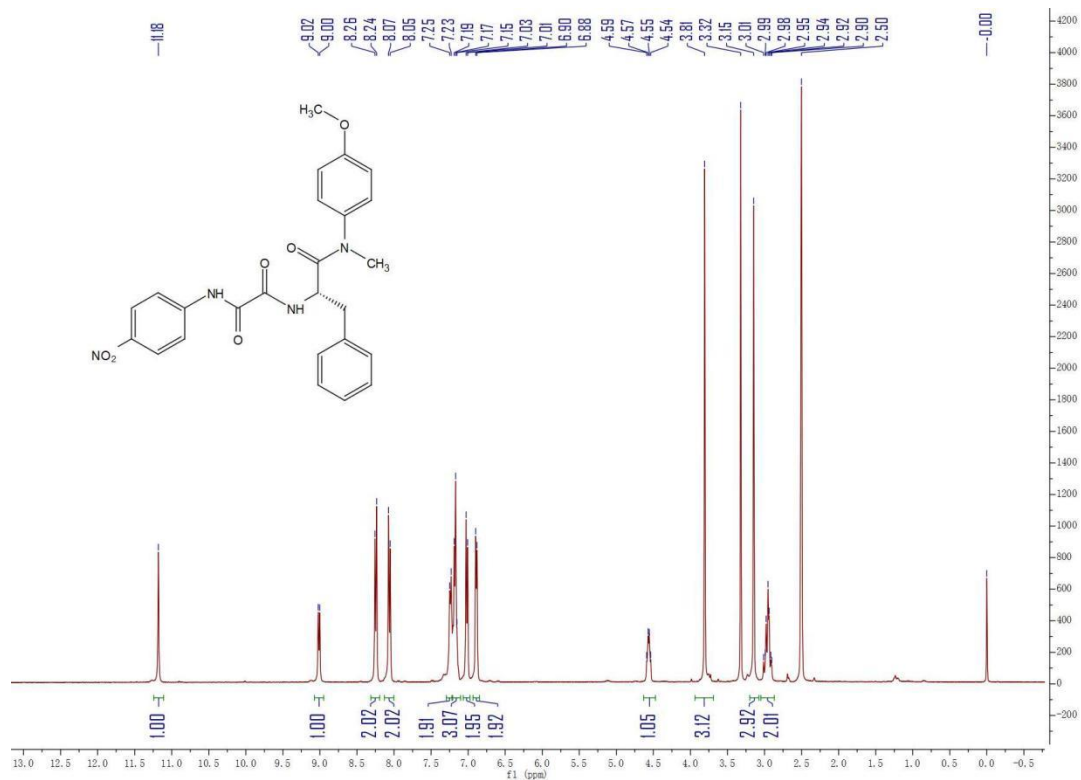

Fig. 52: <sup>1</sup>H NMR spectrum of III-16f

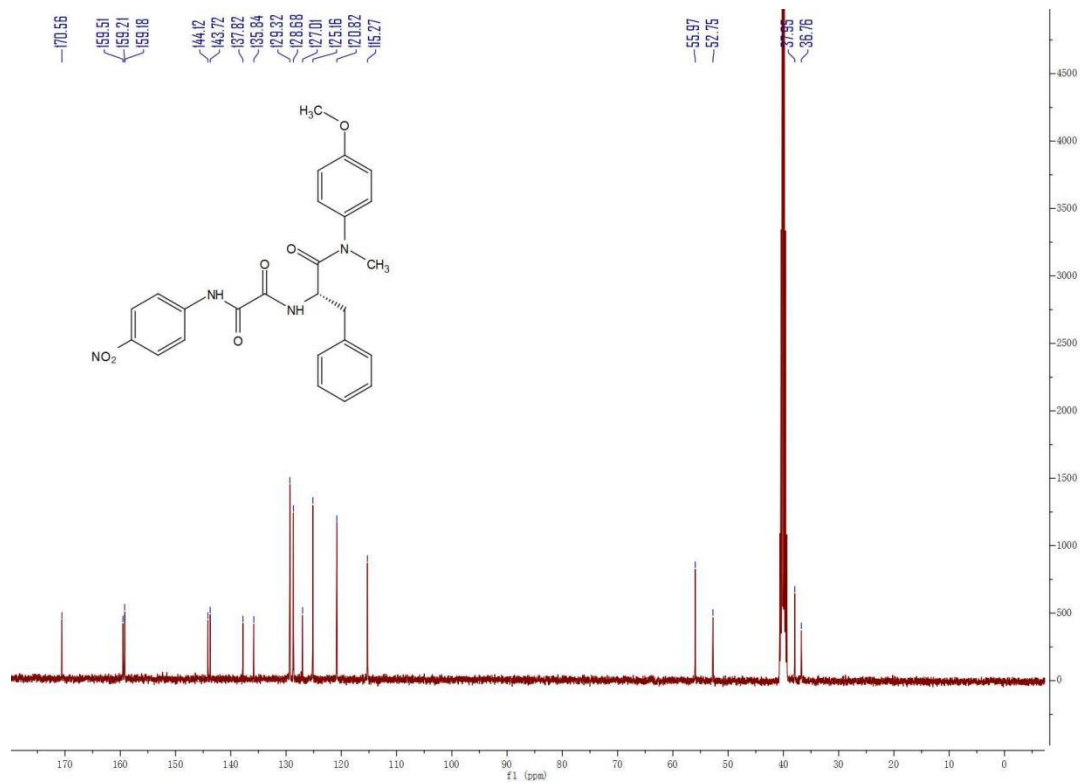

Fig. 53:  $^{13}\text{C}$  NMR spectrum of III-16f

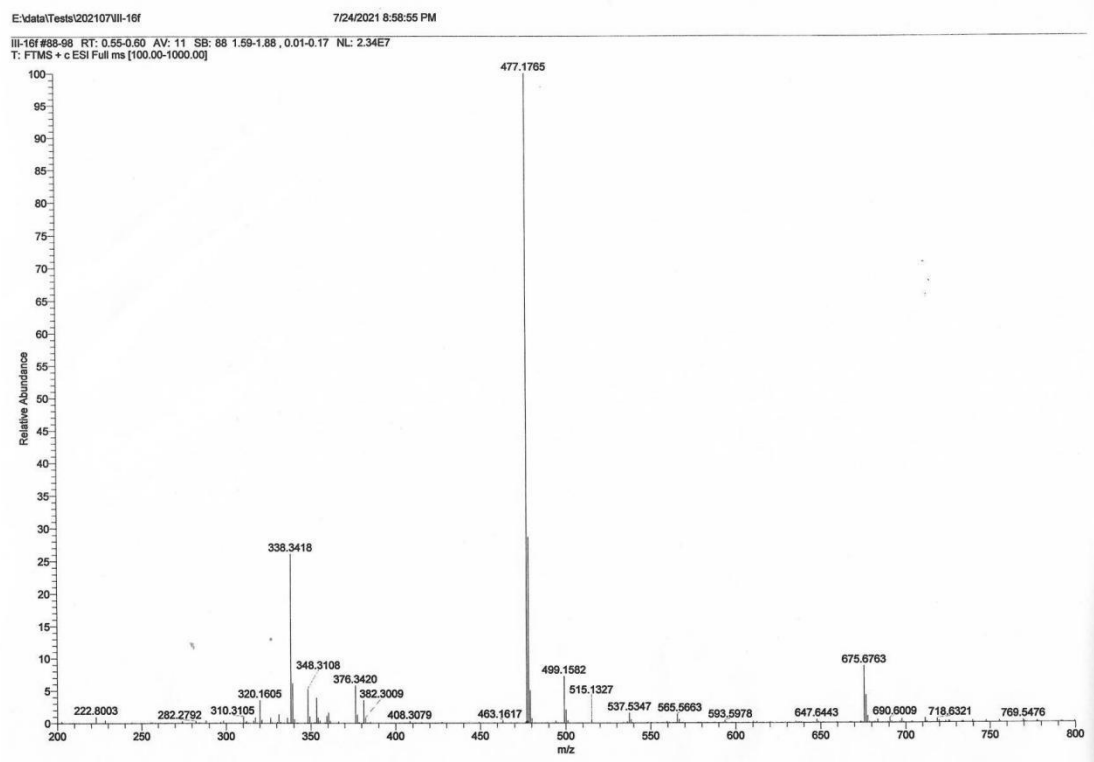

Fig. 54: HRMS spectrum of III-16f

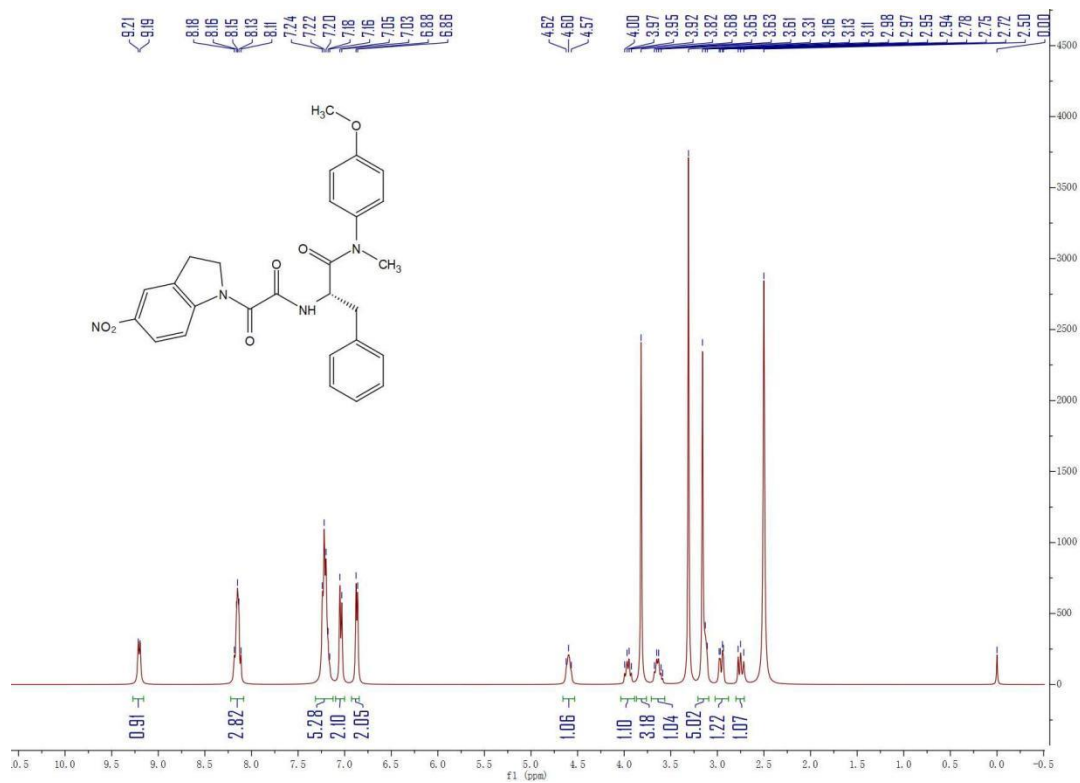

Fig. 55: <sup>1</sup>H NMR spectrum of III-16g

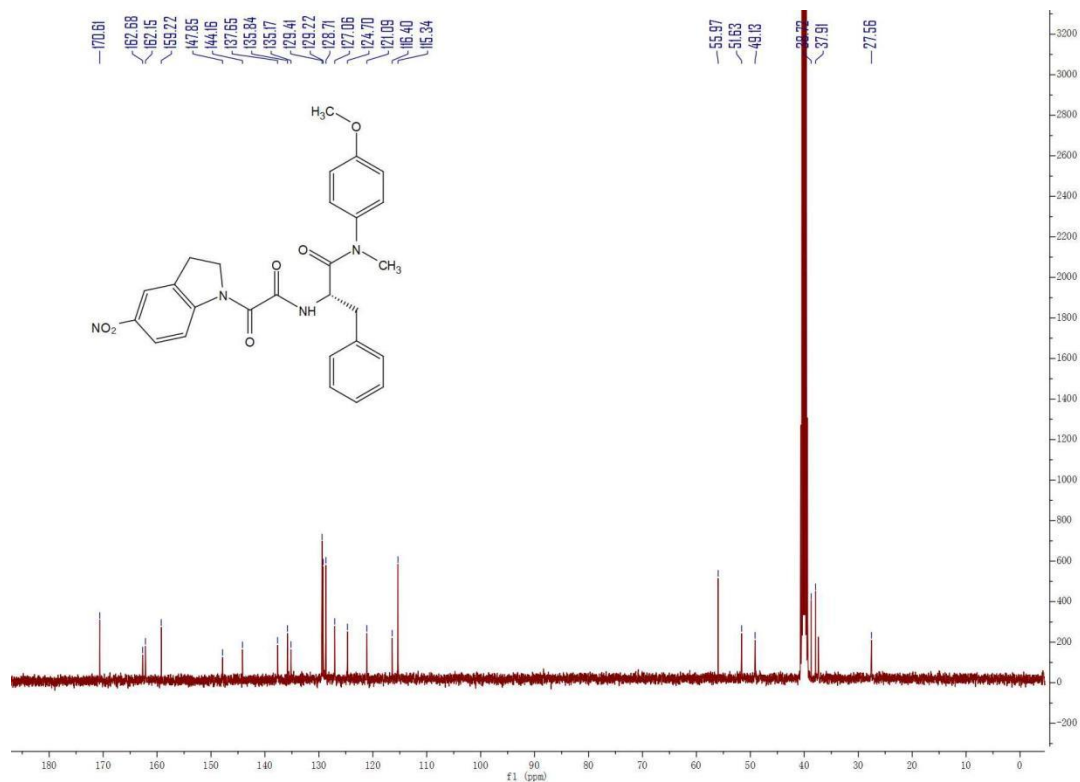

Fig. 56: <sup>13</sup>C NMR spectrum of III-16g

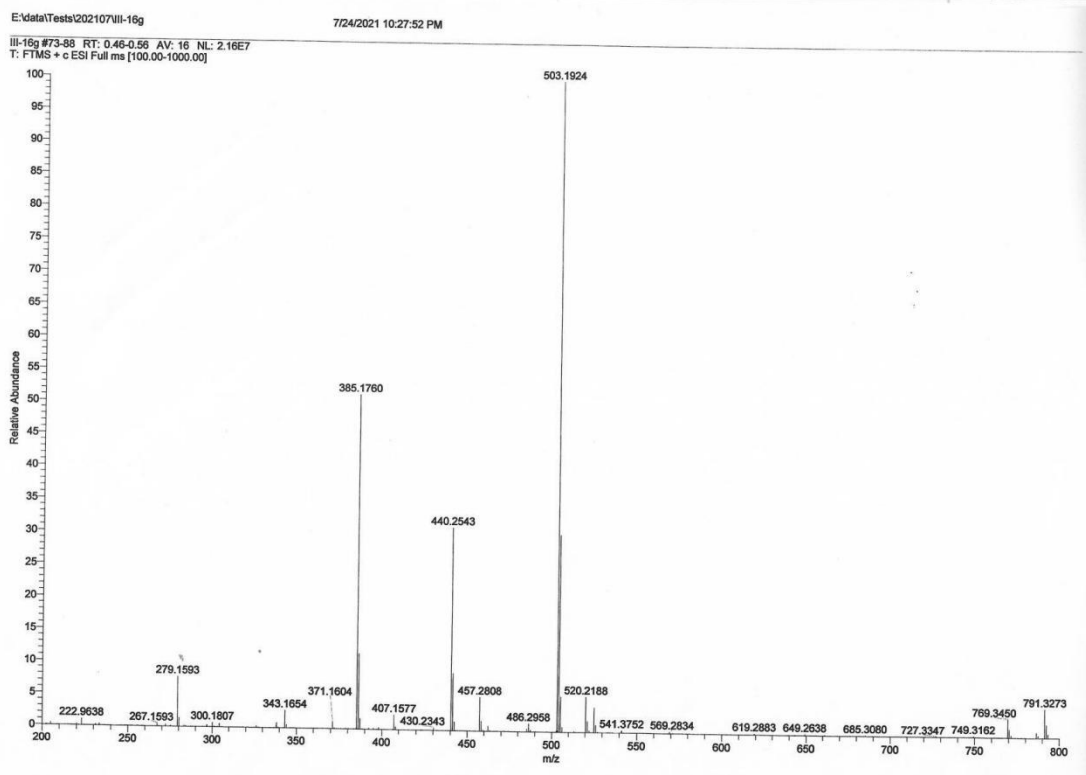

Fig. 57: HRMS spectrum of III-16g

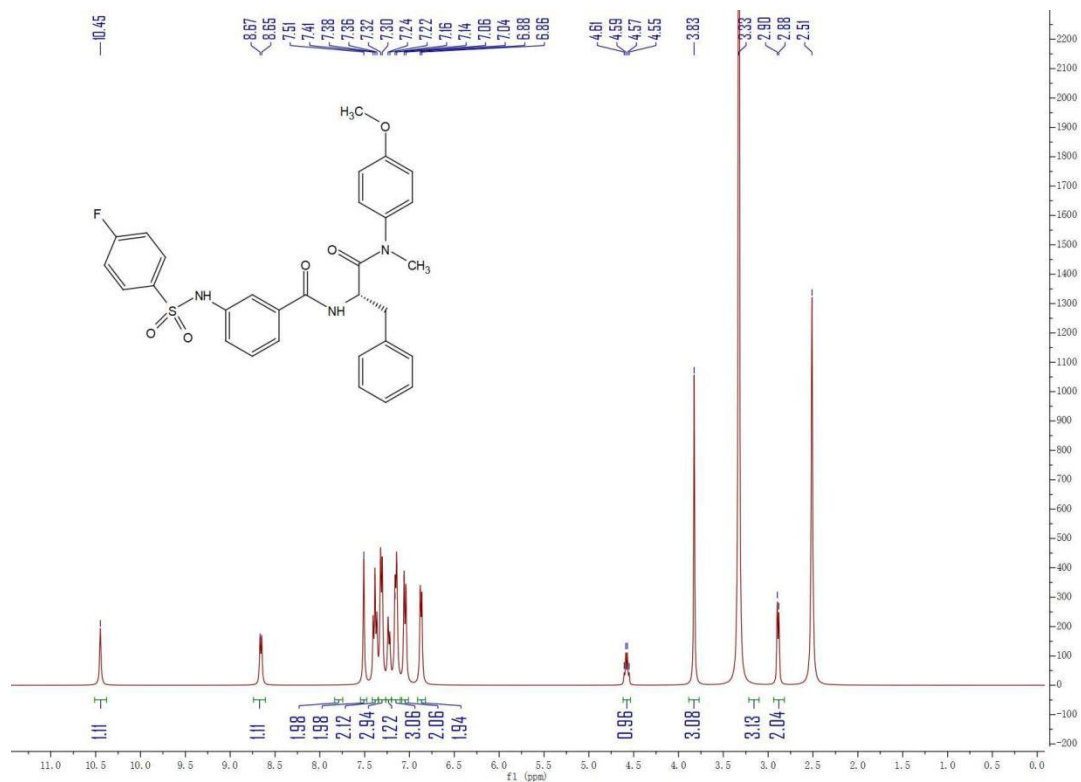

Fig. 58: <sup>1</sup>H NMR spectrum of IV-19a

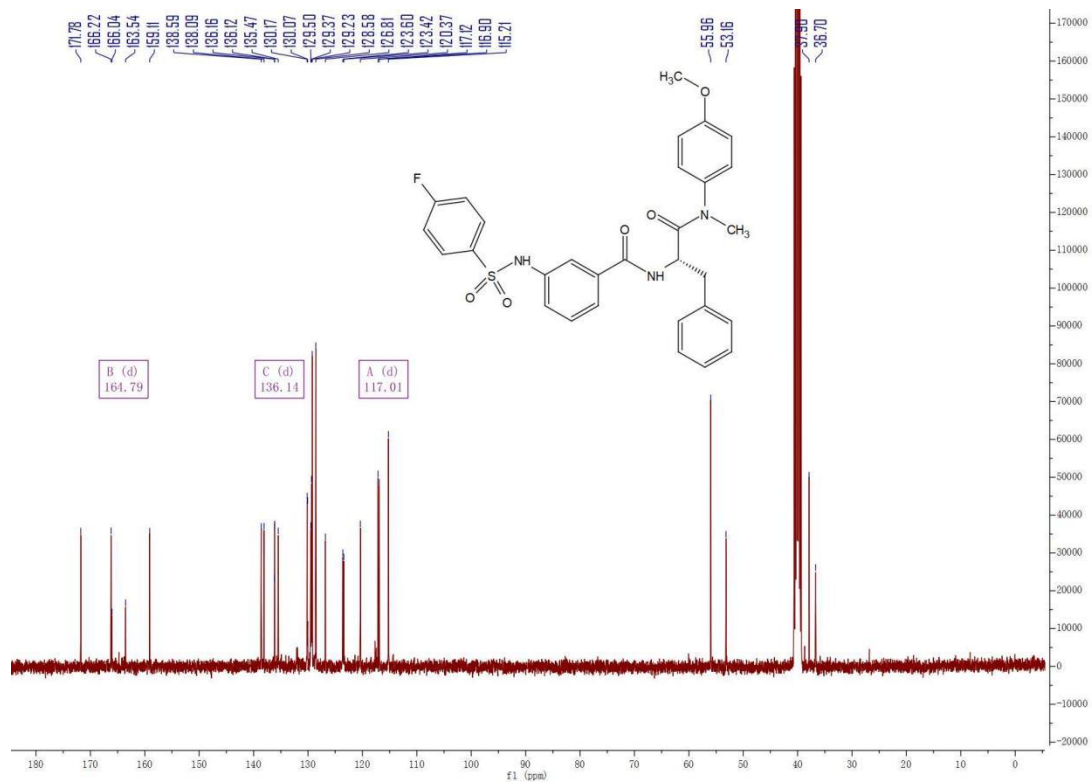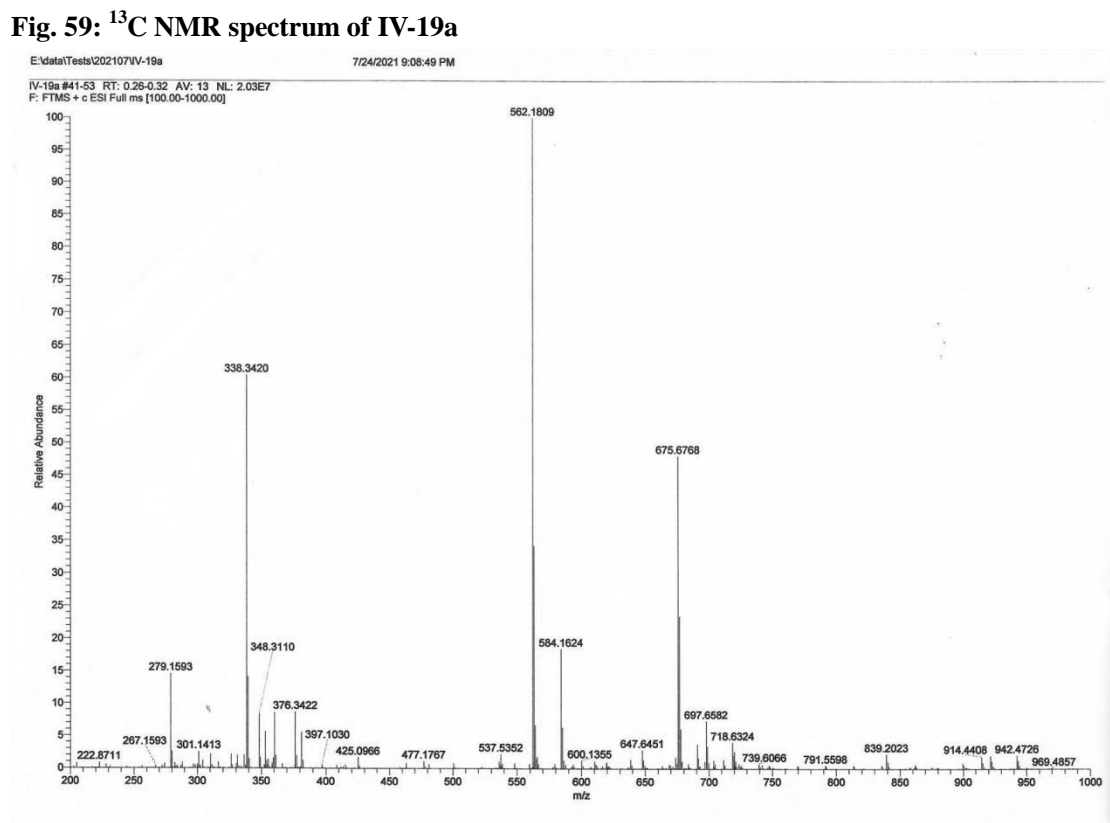

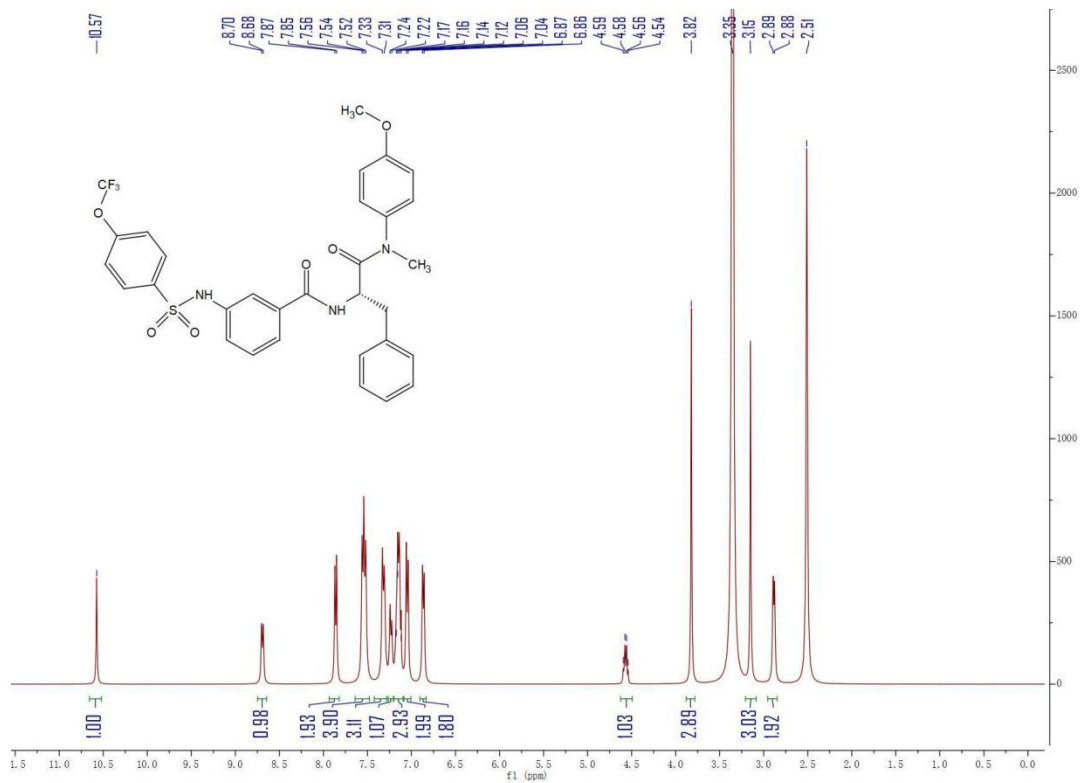

Fig. 61: <sup>1</sup>H NMR spectrum of IV-19b

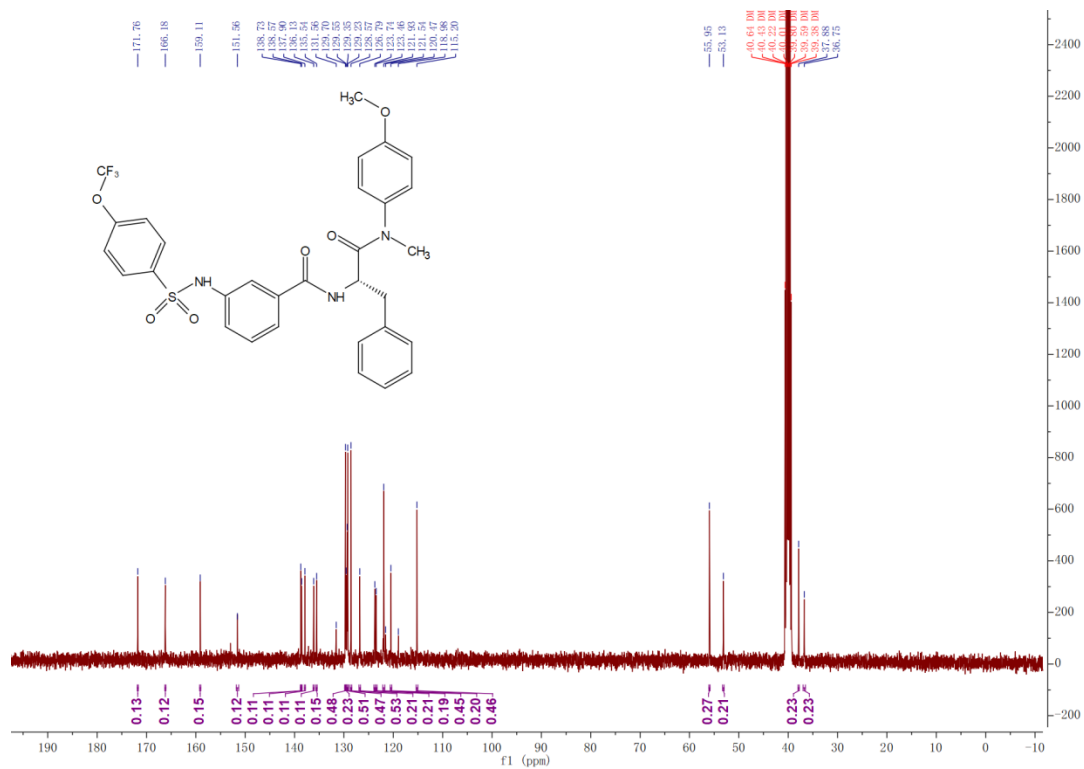

Fig. 62: <sup>13</sup>C NMR spectrum of IV-19b

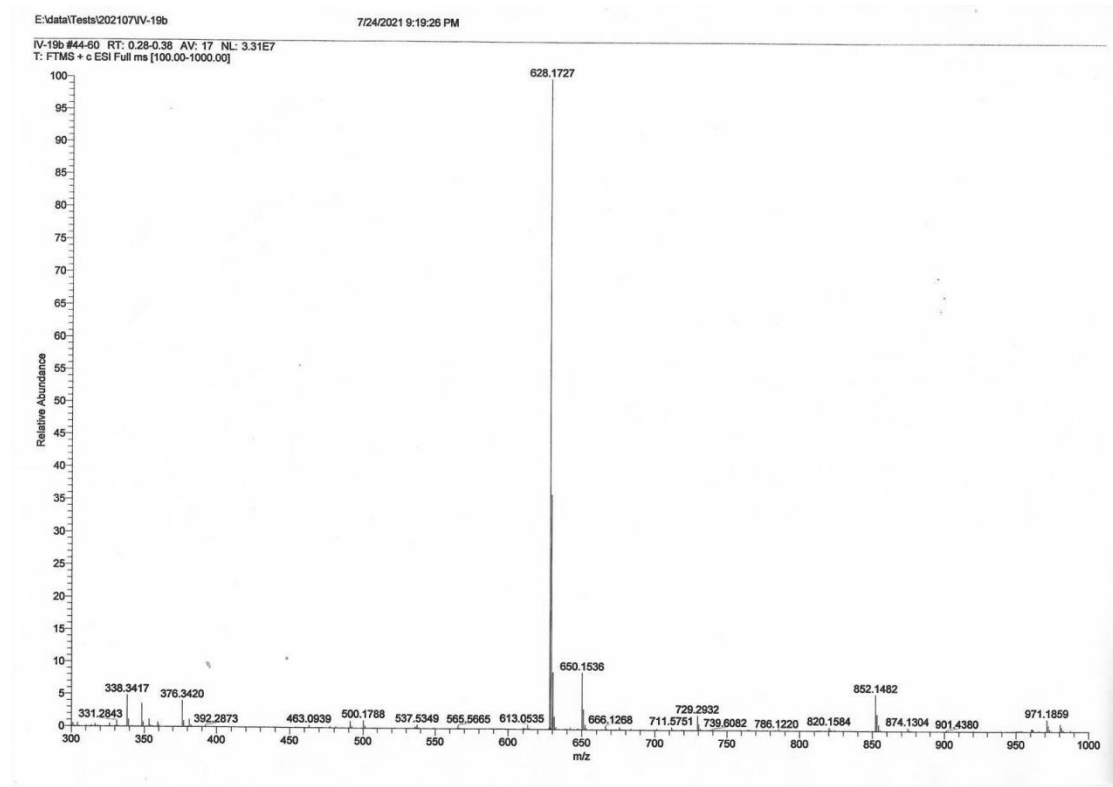

Fig. 63: HRMS spectrum of IV-19b

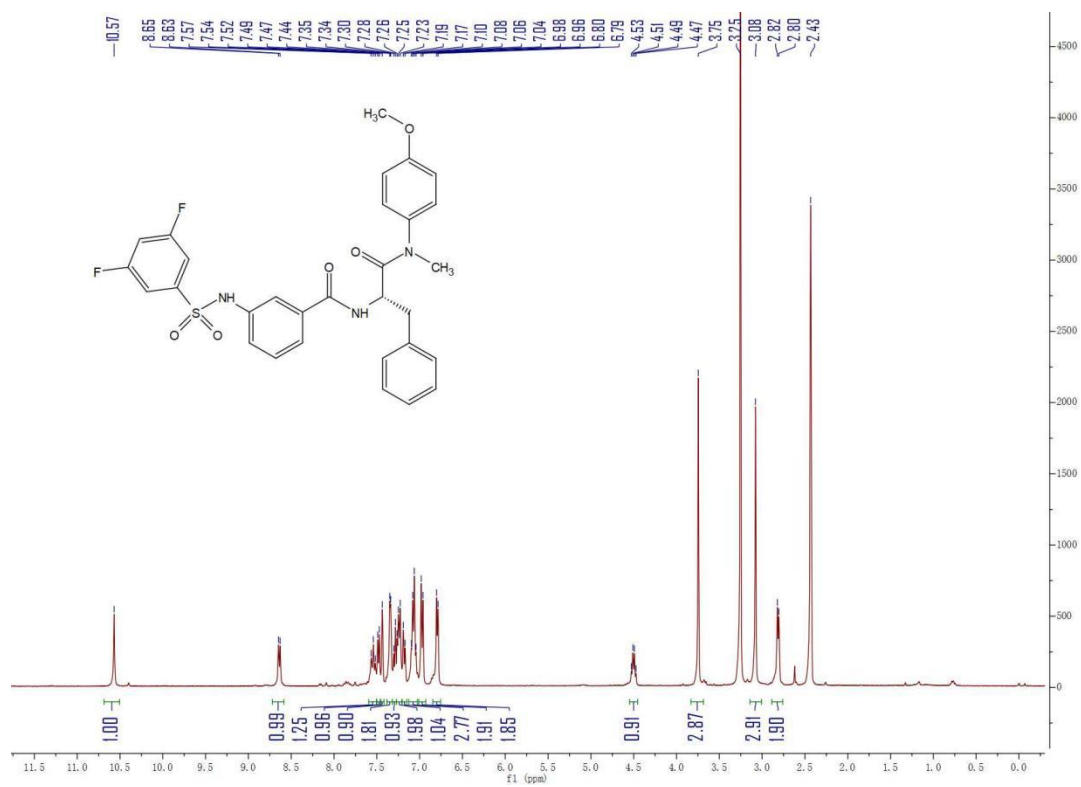

Fig. 64: <sup>1</sup>H NMR spectrum of IV-19c



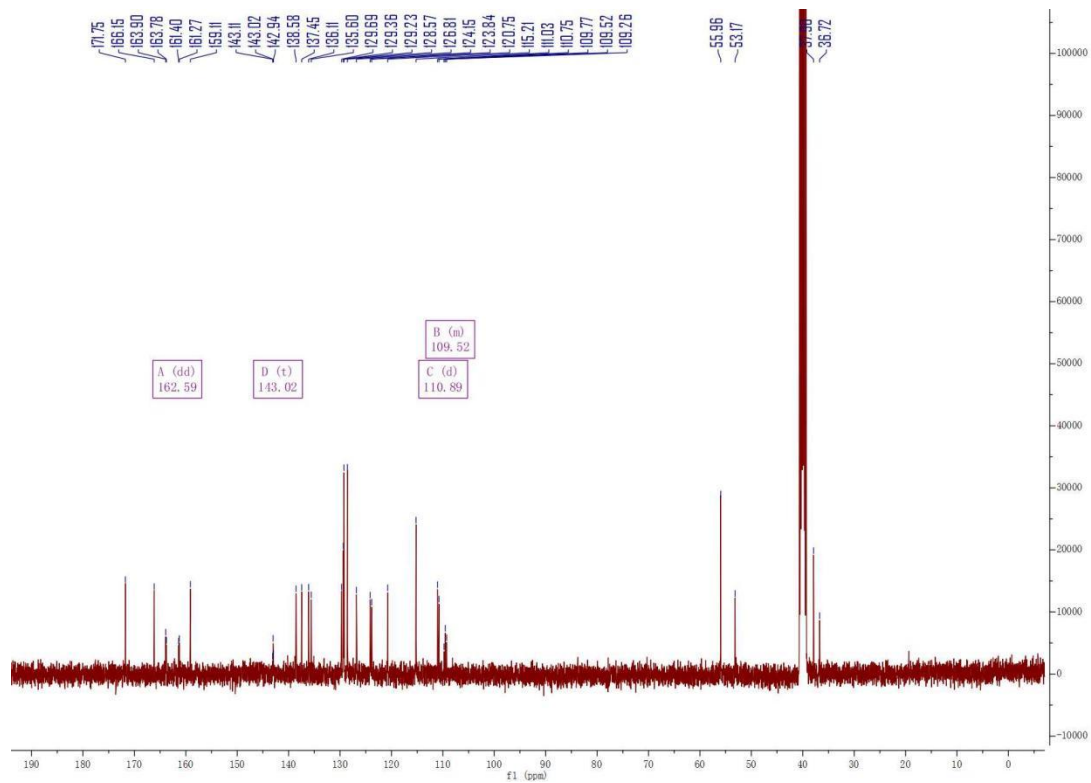

Fig. 65:  $^{13}\text{C}$  NMR spectrum of IV-19c

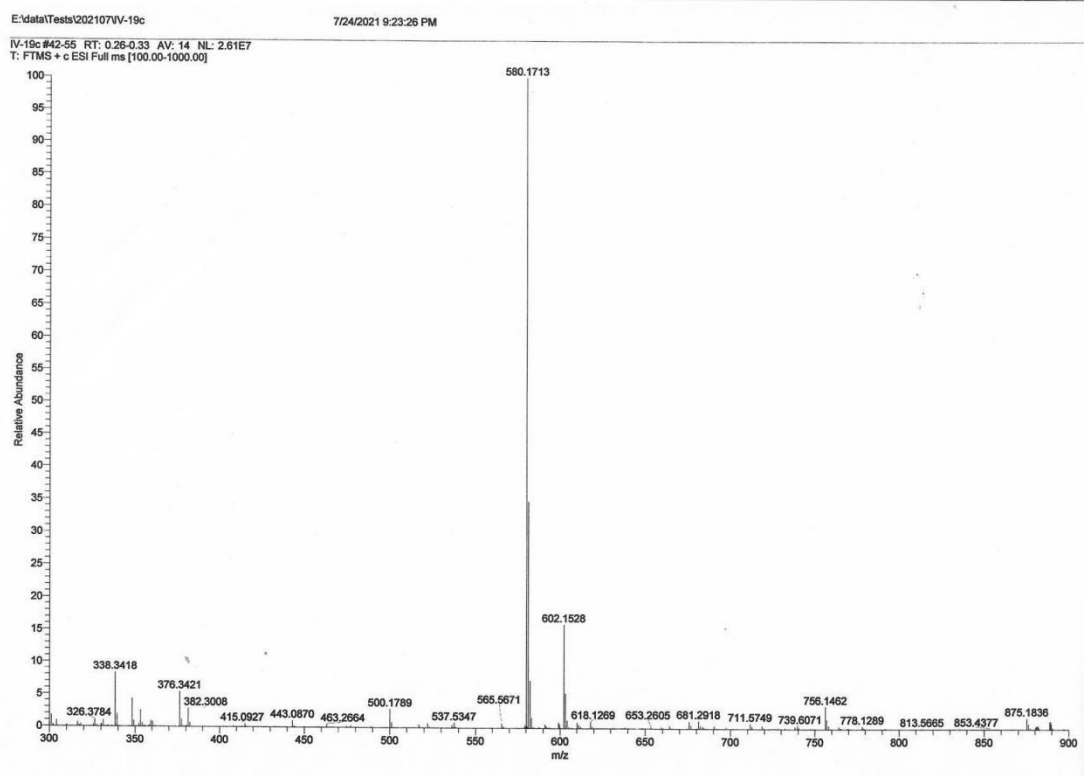

Fig. 66: HRMS spectrum of IV-19c

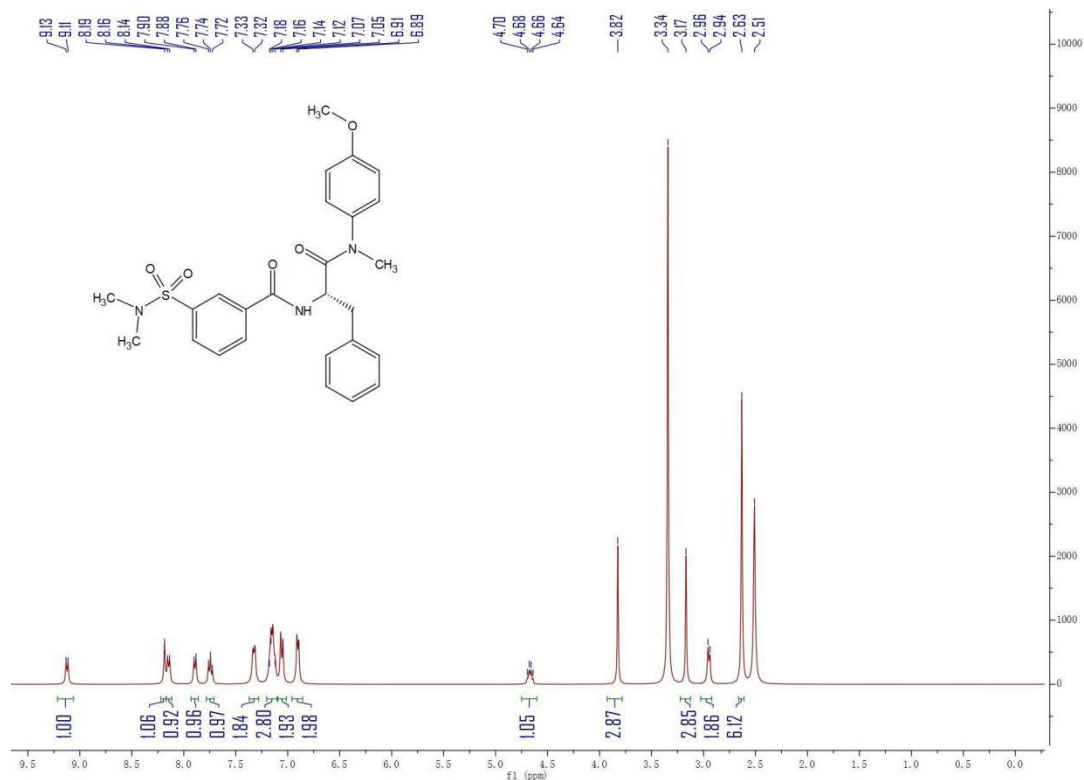

Fig. 67: <sup>1</sup>H NMR spectrum of V-25a

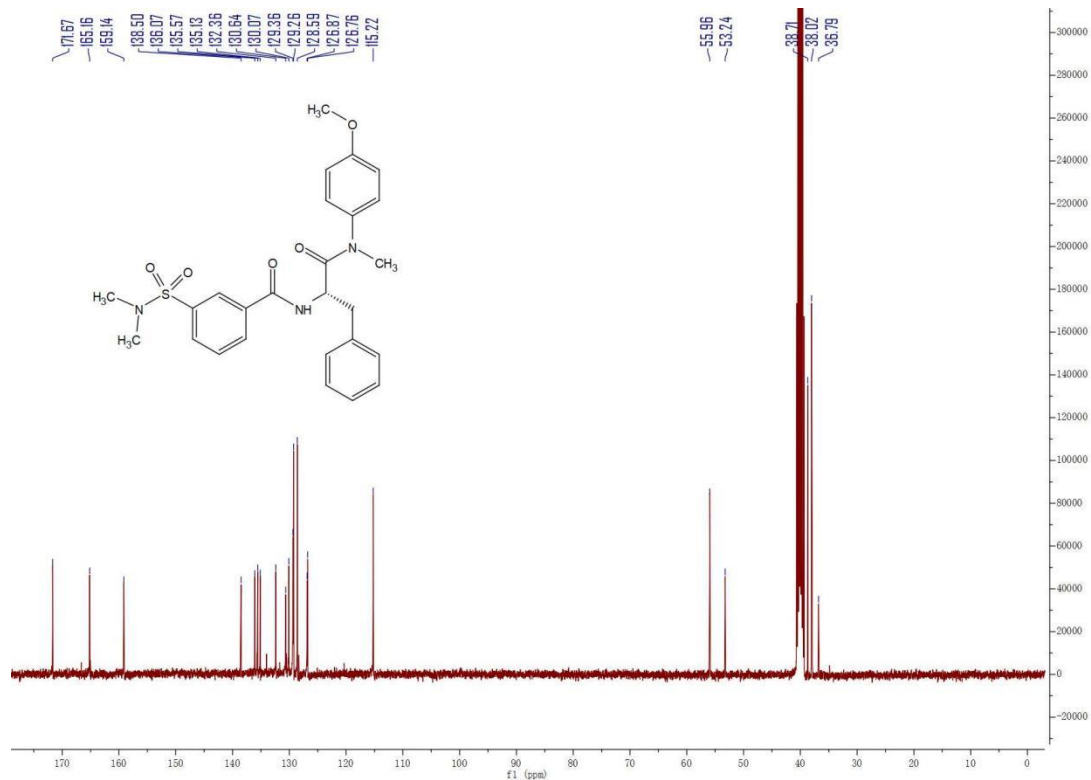

Fig. 68: <sup>13</sup>C NMR spectrum of V-25a

V-20a #39-48 RT: 0.24-0.30 AV: 10 NL: 4.48E7  
T: FTMS + c ESI Full ms [100.00-1000.00]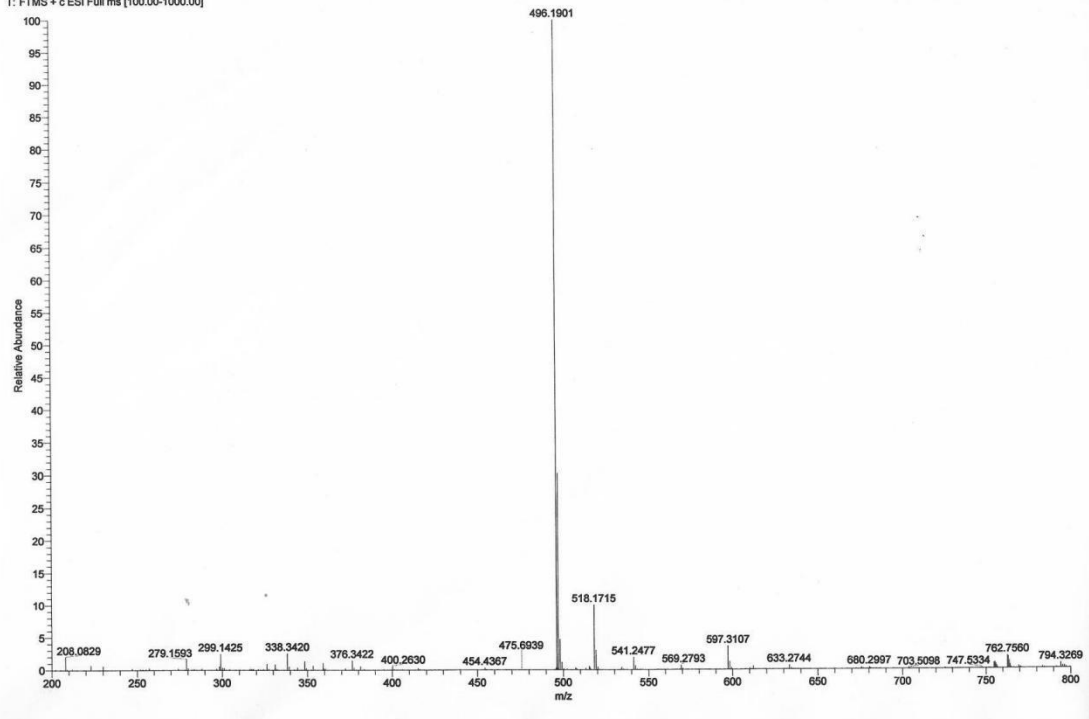

Fig. 69: HRMS spectrum of V-25a

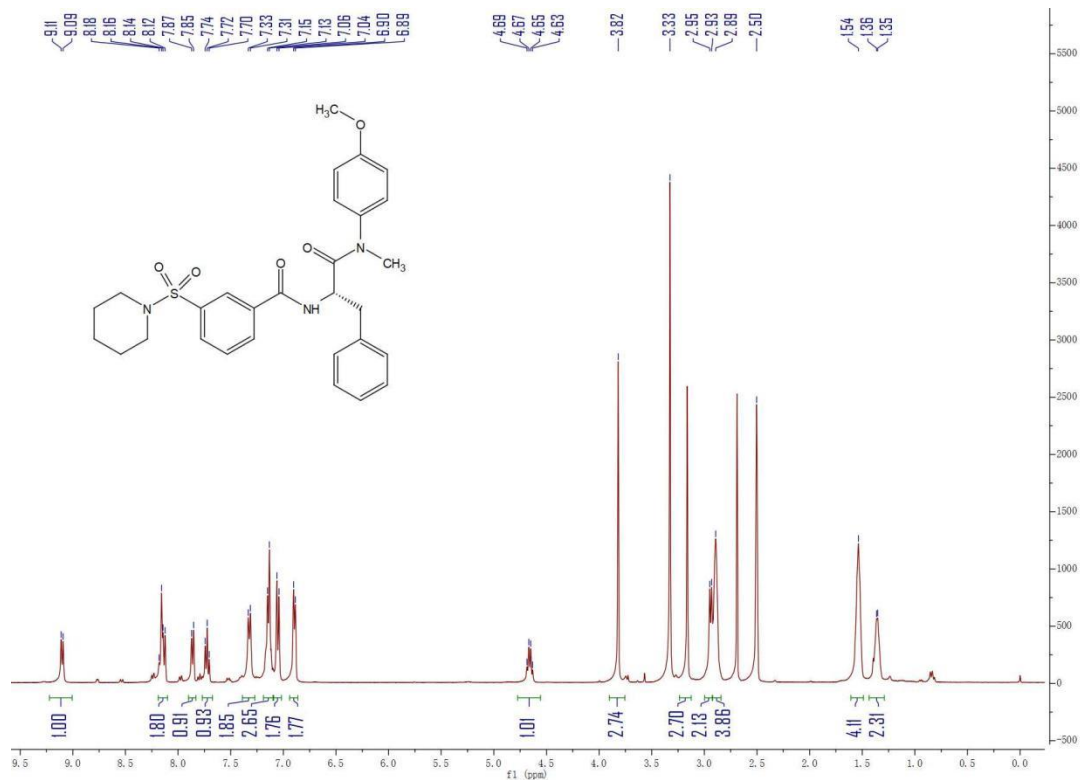Fig. 70: <sup>1</sup>H NMR spectrum of V-25b

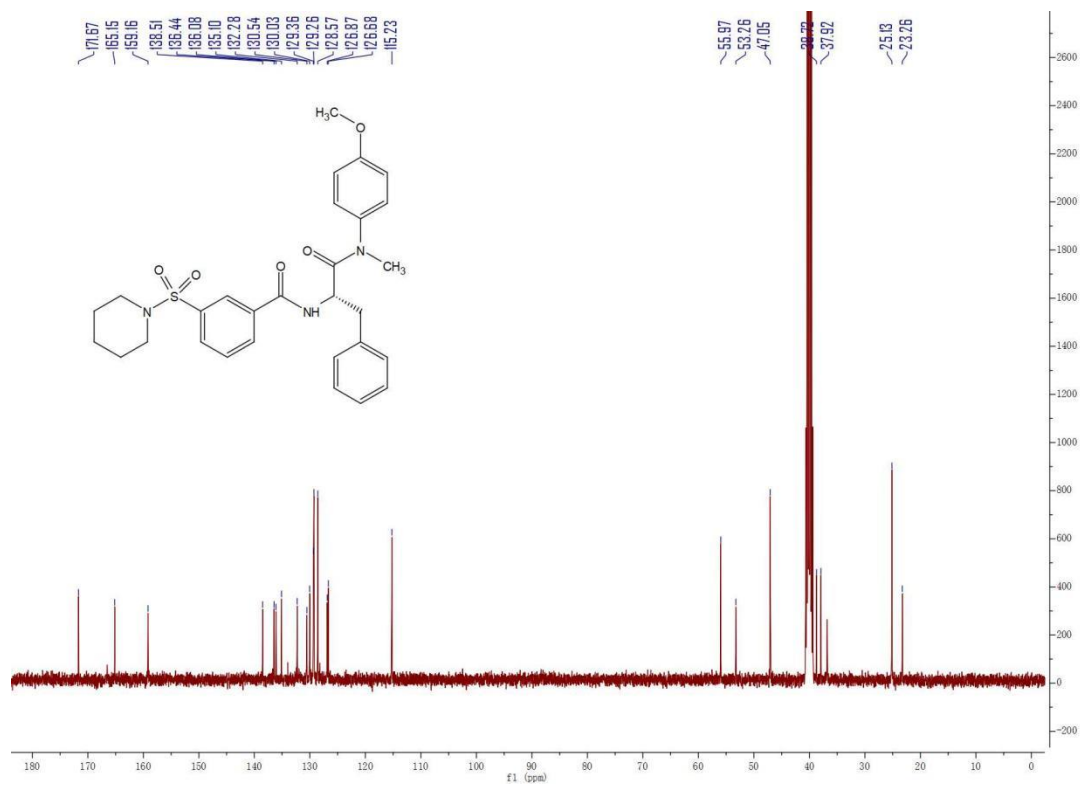

Fig. 71: <sup>13</sup>C NMR spectrum of V-25b

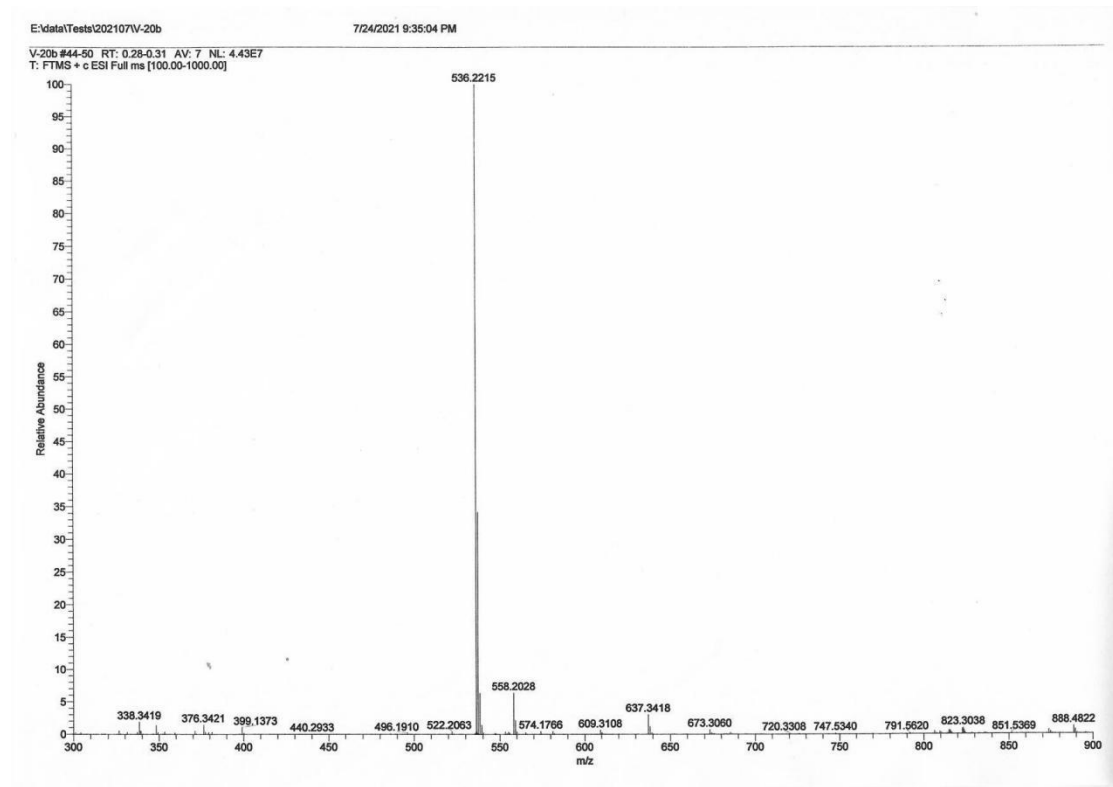

Fig. 72: HRMS spectrum of V-25b

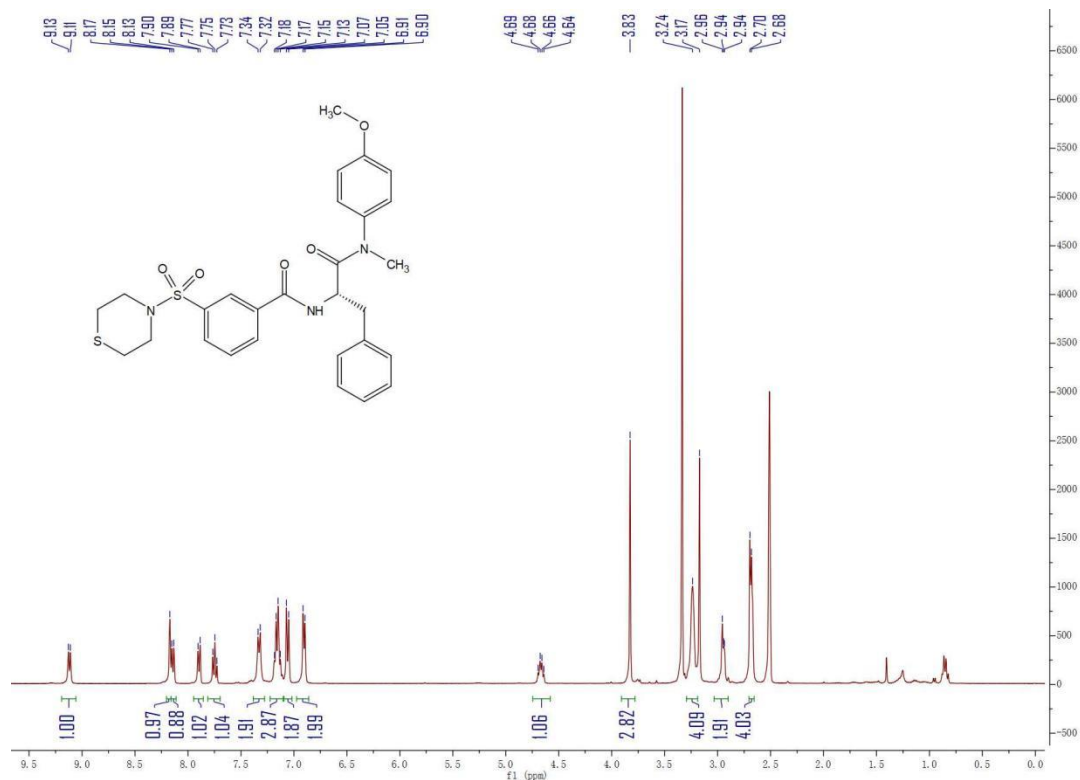

Fig. 73: <sup>1</sup>H NMR spectrum of V-25c

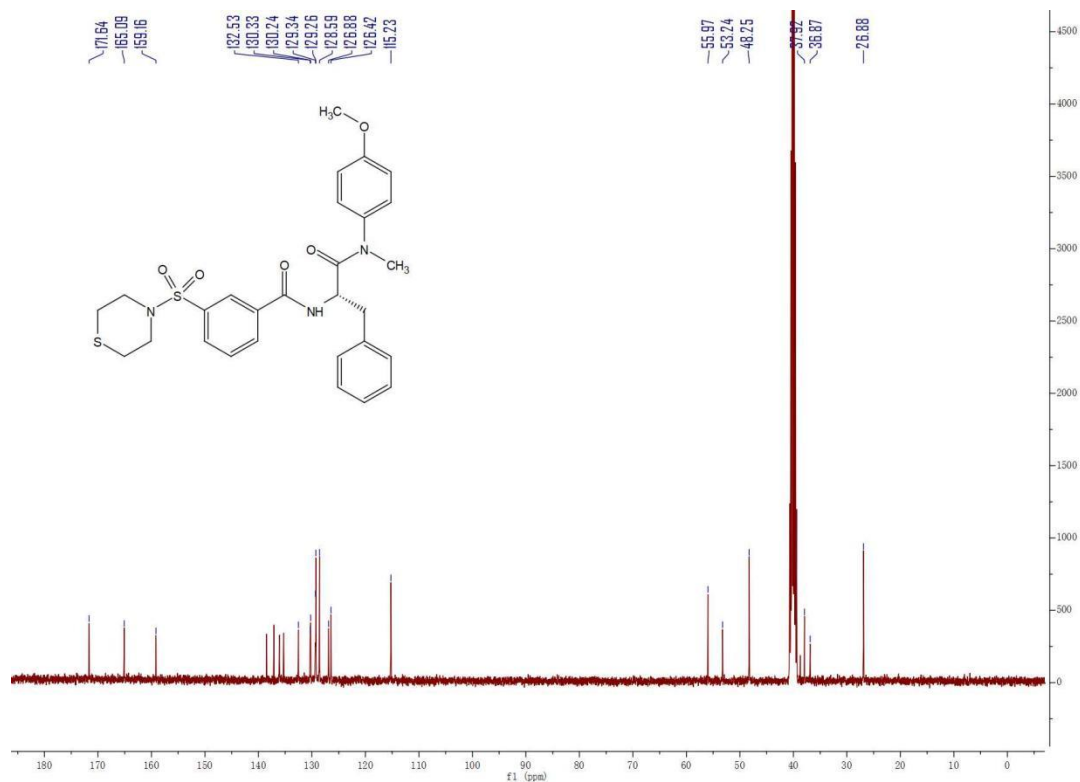

Fig. 74: <sup>13</sup>C NMR spectrum of V-25c

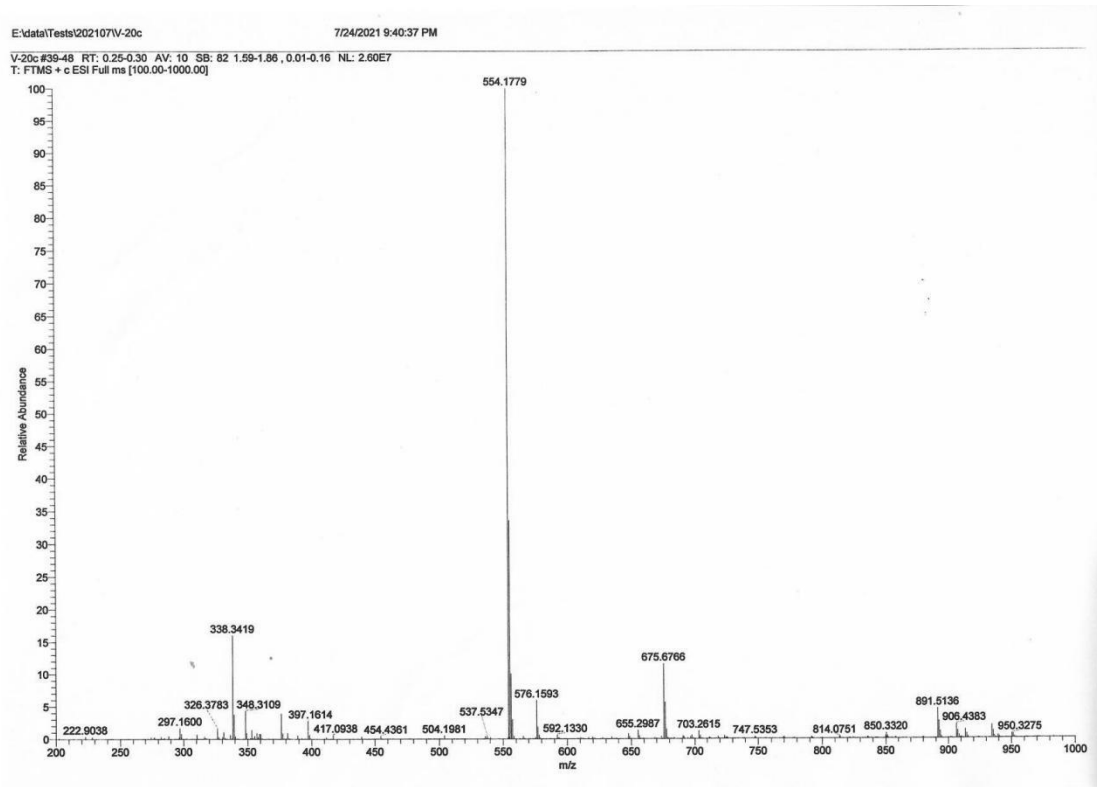

Fig. 75: HRMS spectrum of V-25c

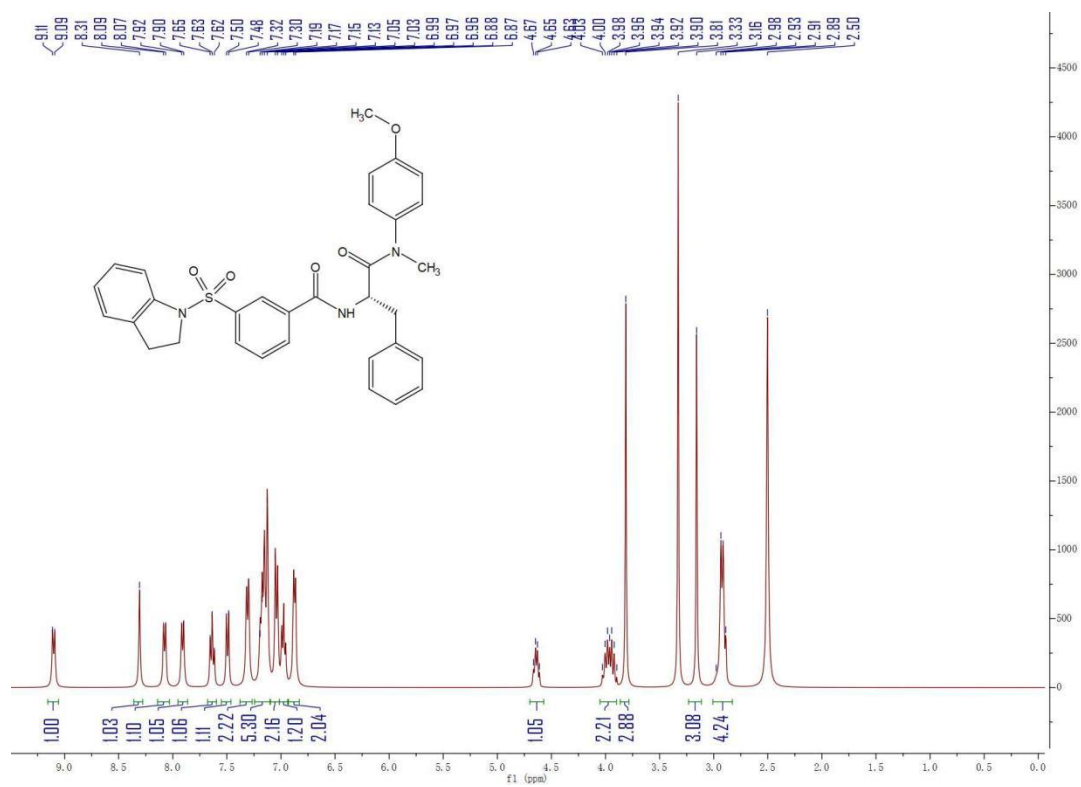

Fig. 76: <sup>1</sup>H NMR spectrum of V-25d

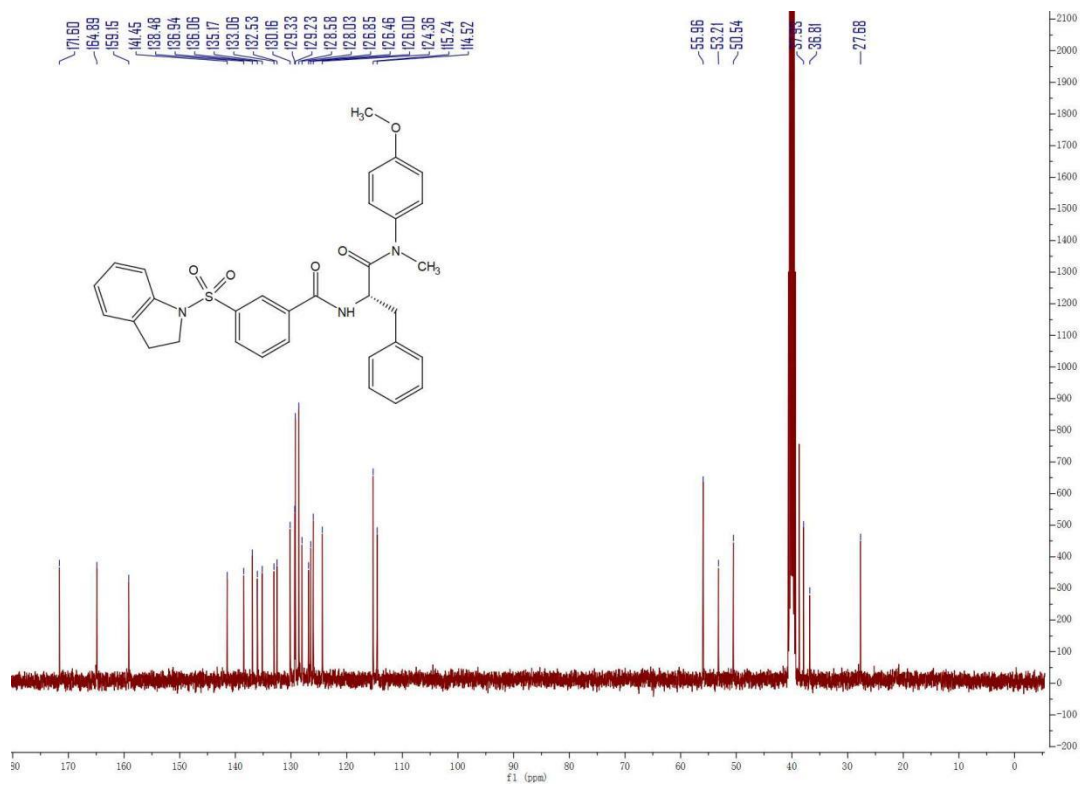

Fig. 77: <sup>13</sup>C NMR spectrum of V-25d

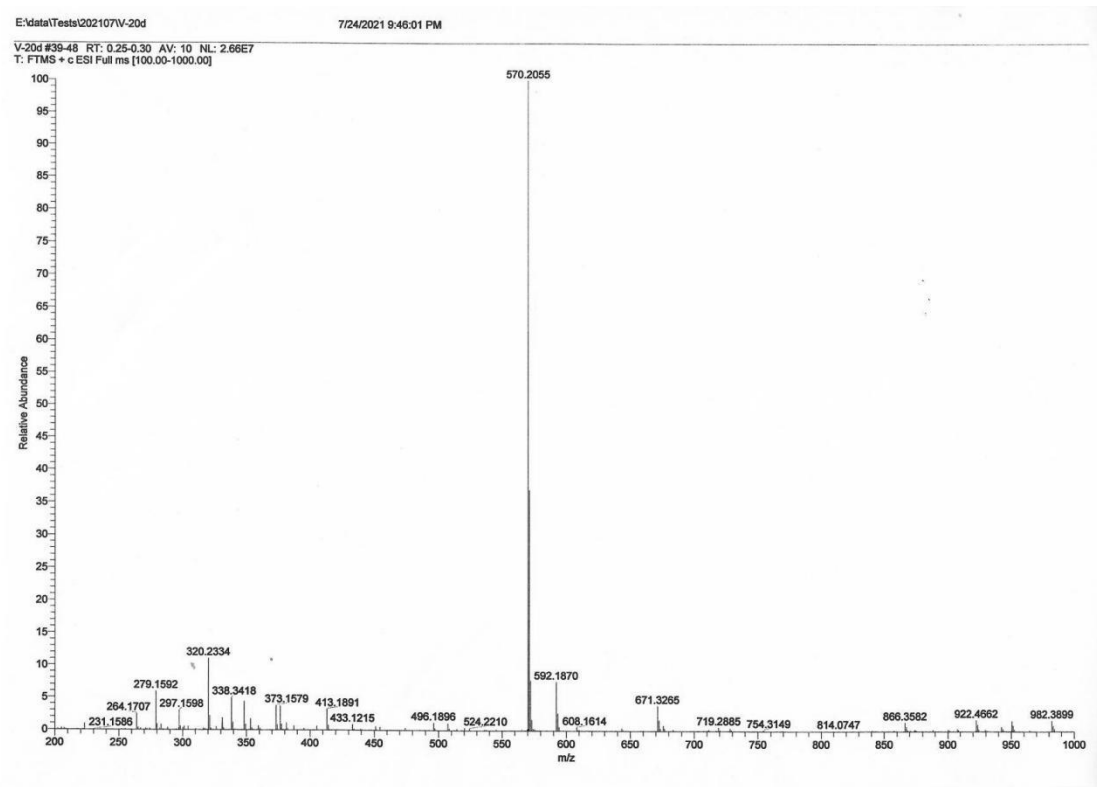

Fig. 78: HRMS spectrum of V-25d

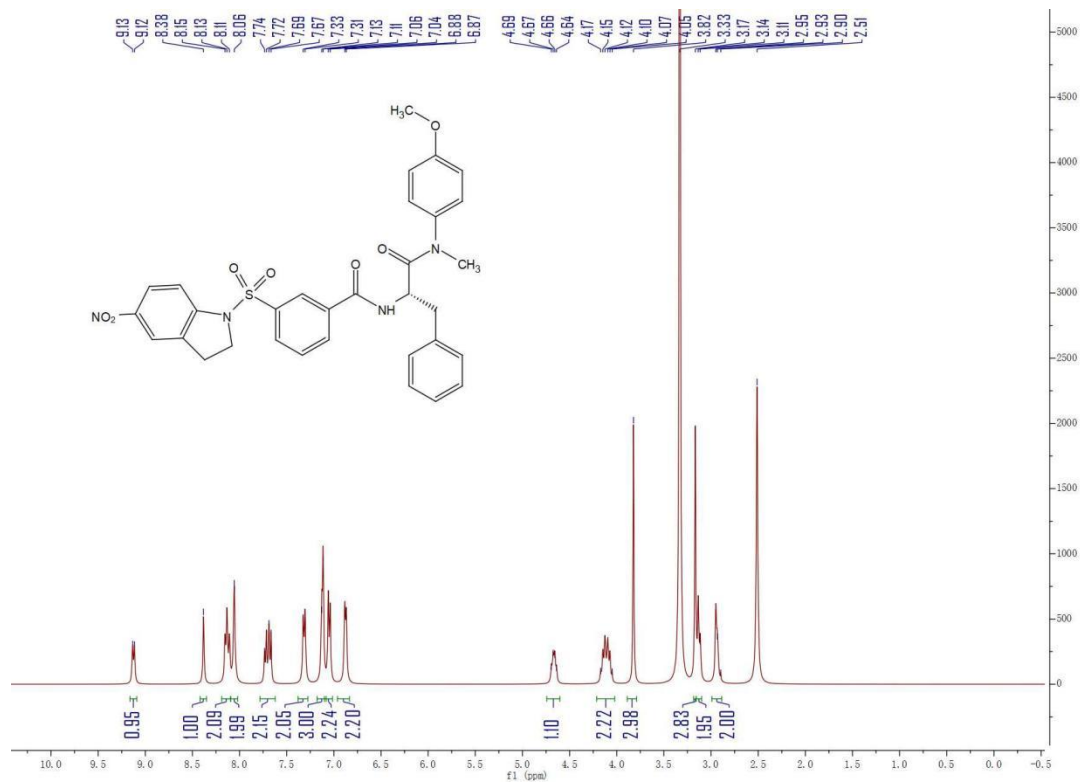

Fig. 79:  $^1\text{H}$  NMR spectrum of V-25e

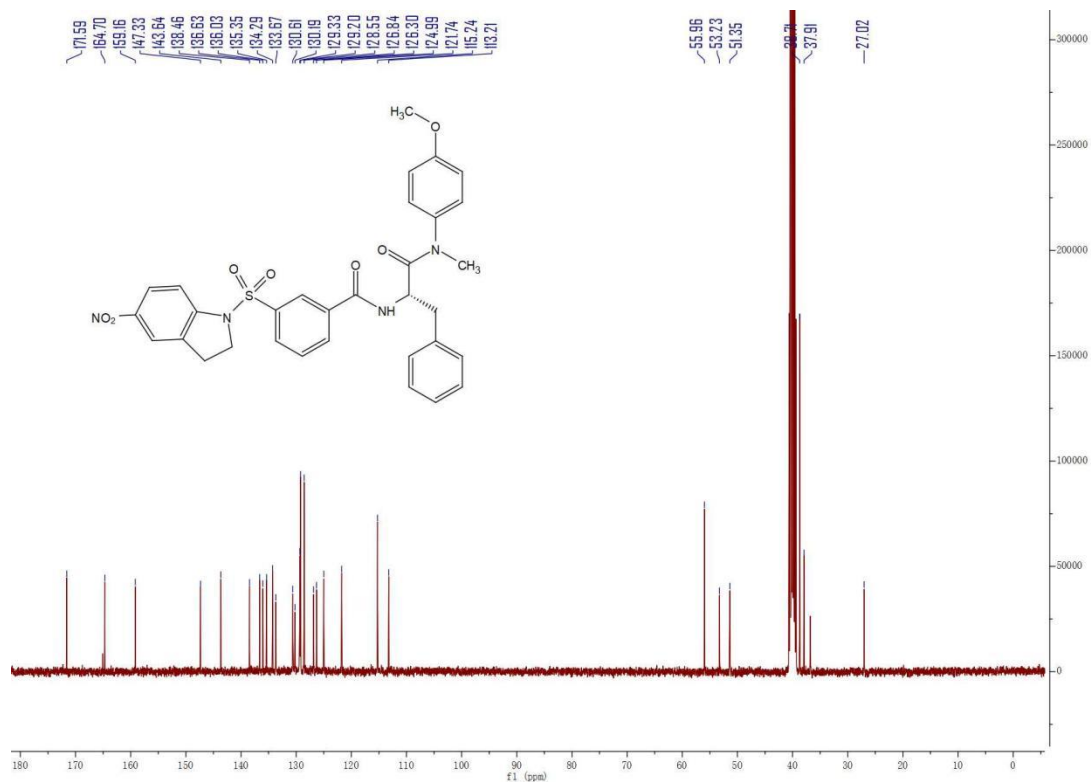

Fig. 80:  $^{13}\text{C}$  NMR spectrum of V-25e



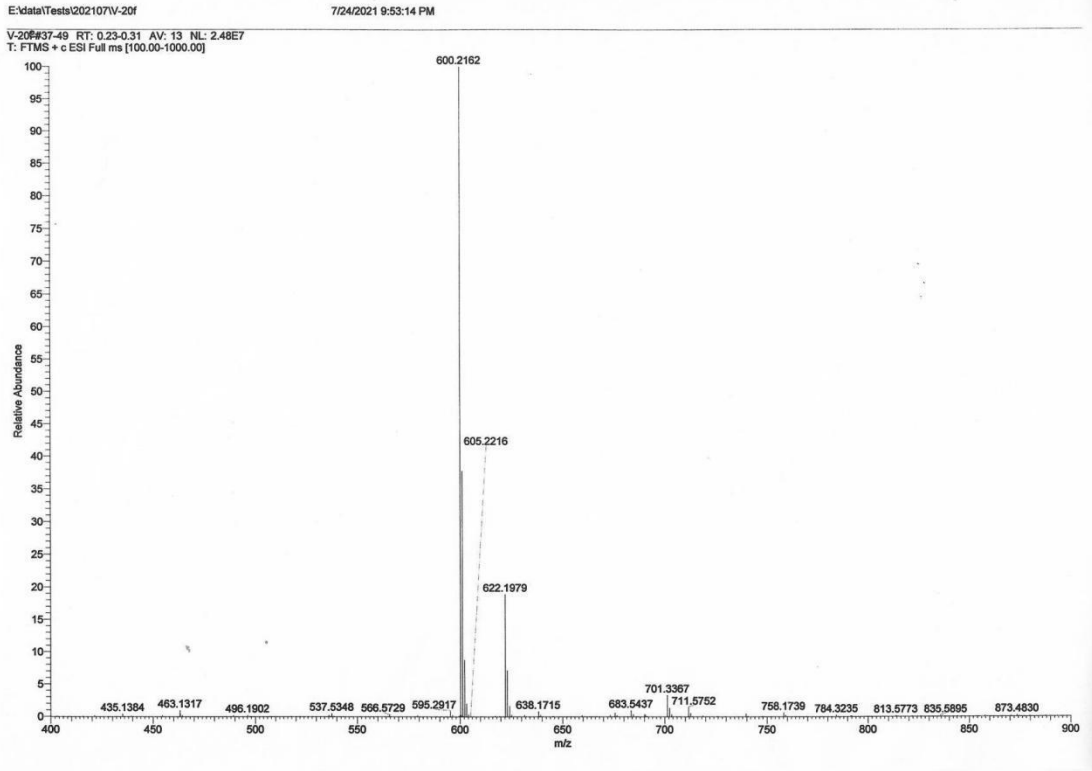

Fig. 81: HRMS spectrum of V-25e

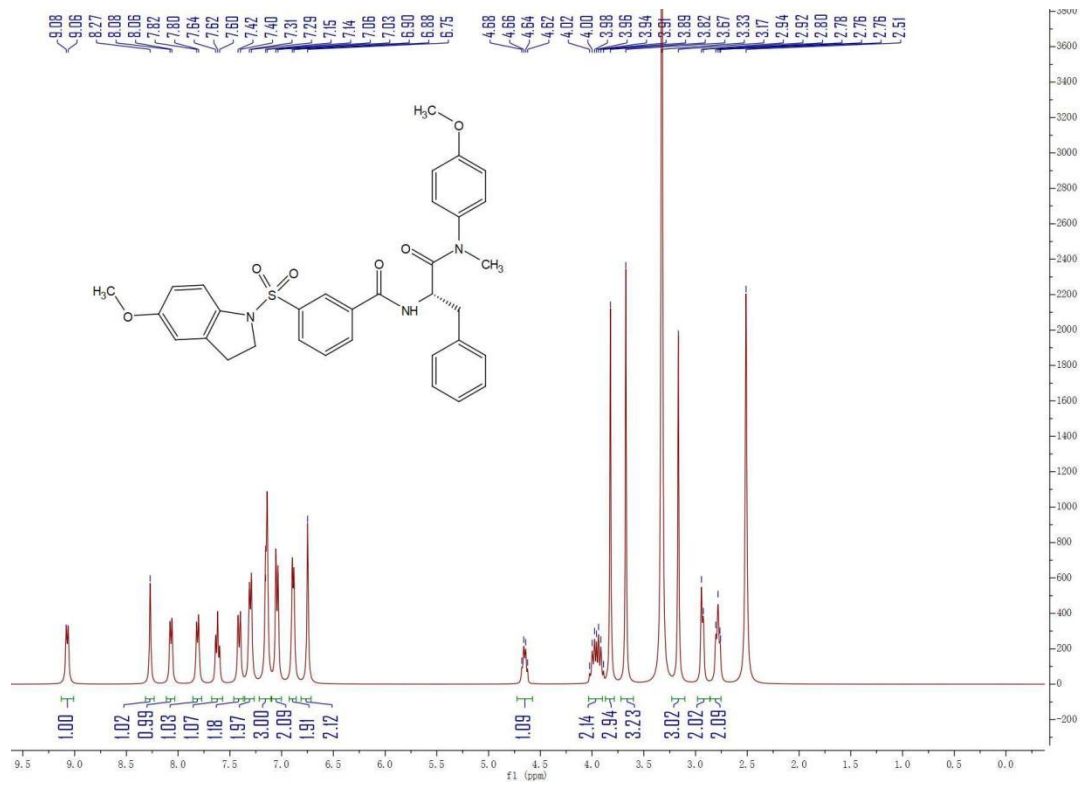

Fig. 82: <sup>1</sup>H NMR spectrum of V-25f

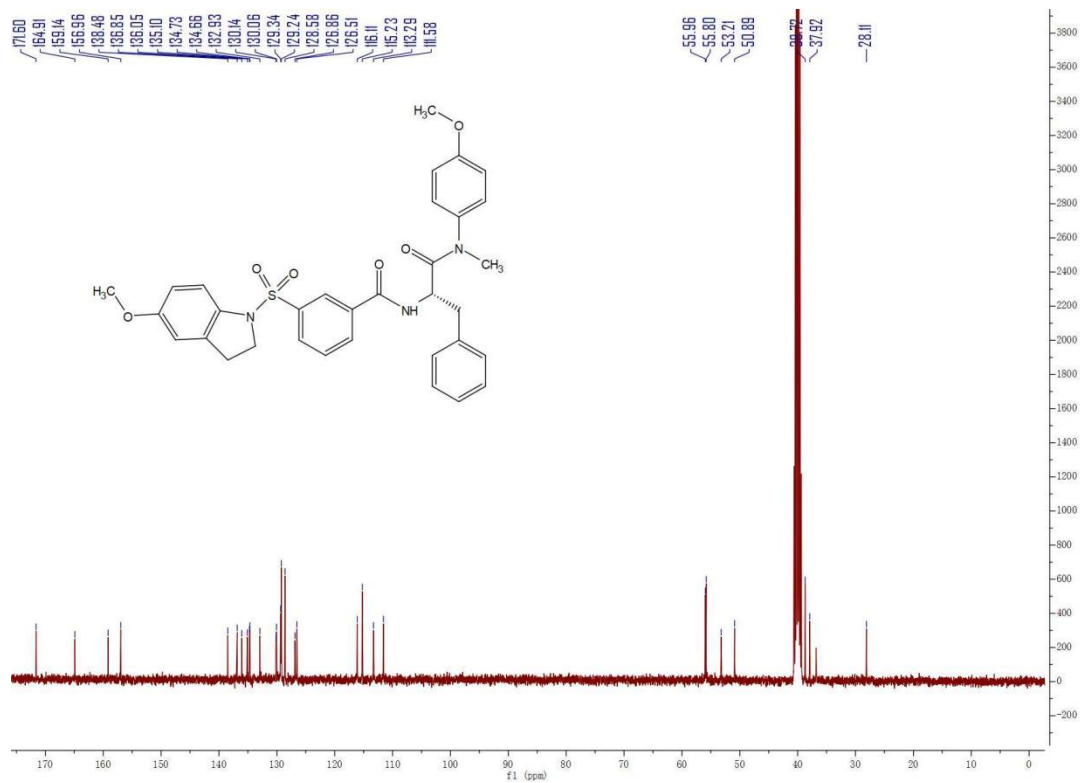

Fig. 83: <sup>13</sup>C NMR spectrum of V-25f

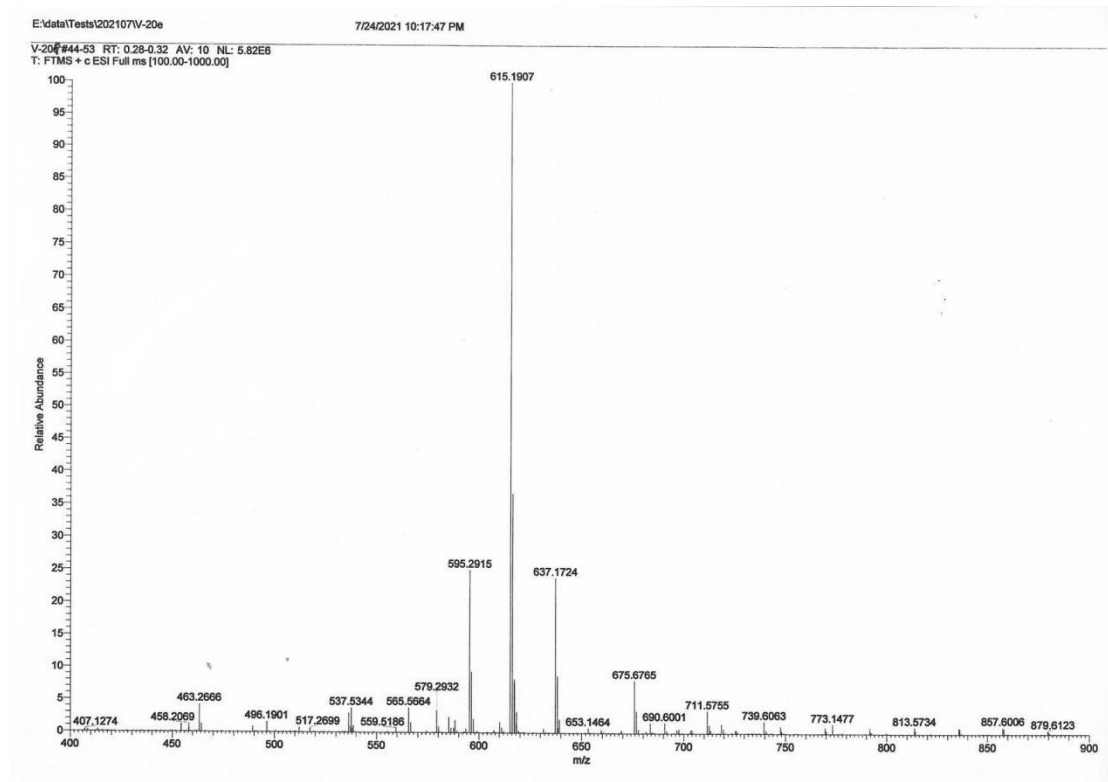

Fig. 84: HRMS spectrum of V-25f

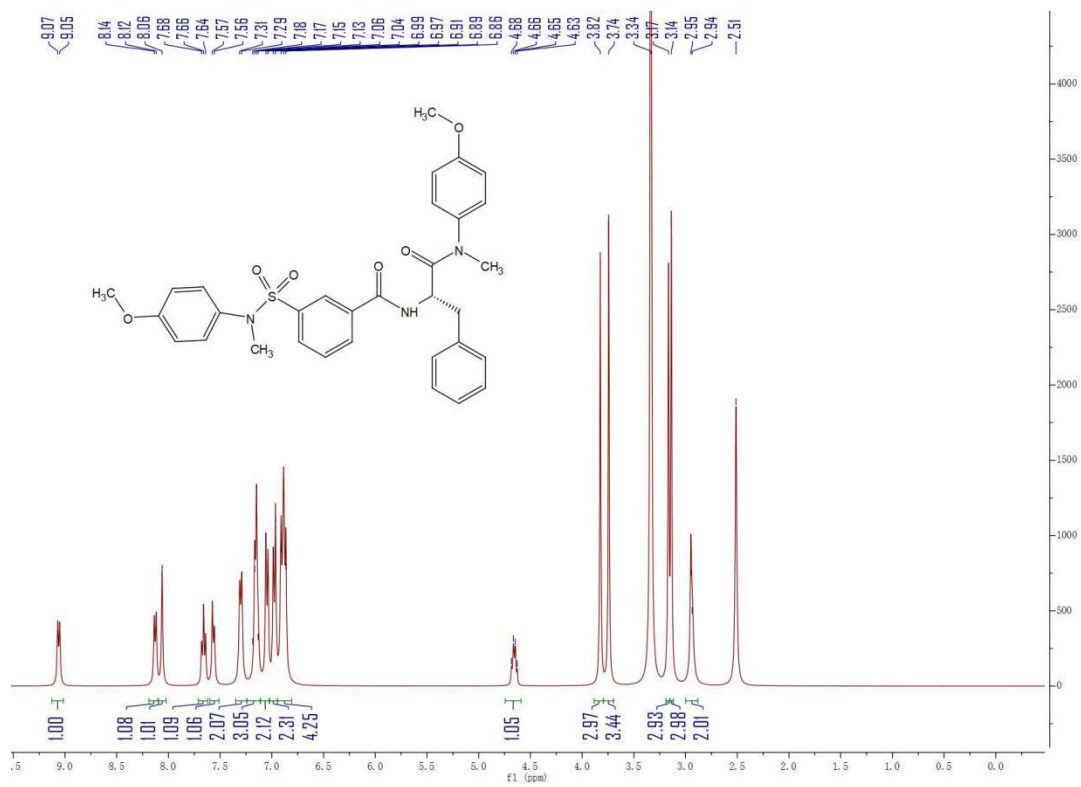

**Fig. 85: <sup>1</sup>H NMR spectrum of V-25g**

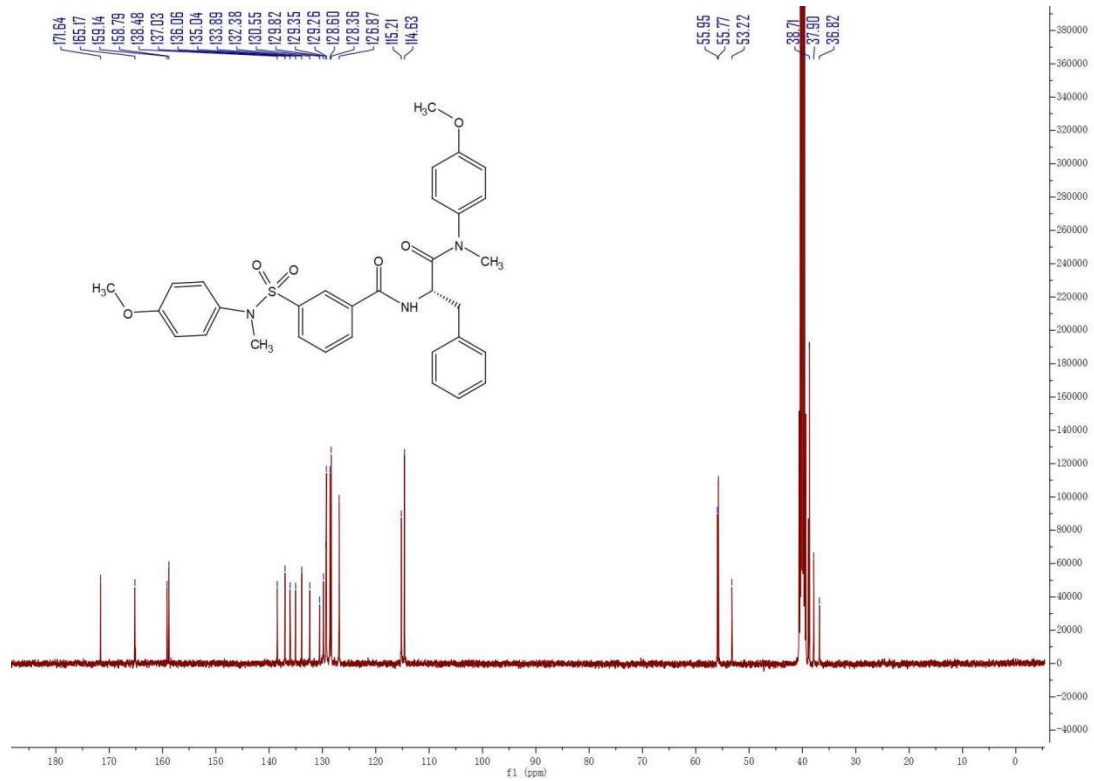

**Fig. 86: <sup>13</sup>C NMR spectrum of V-25g**

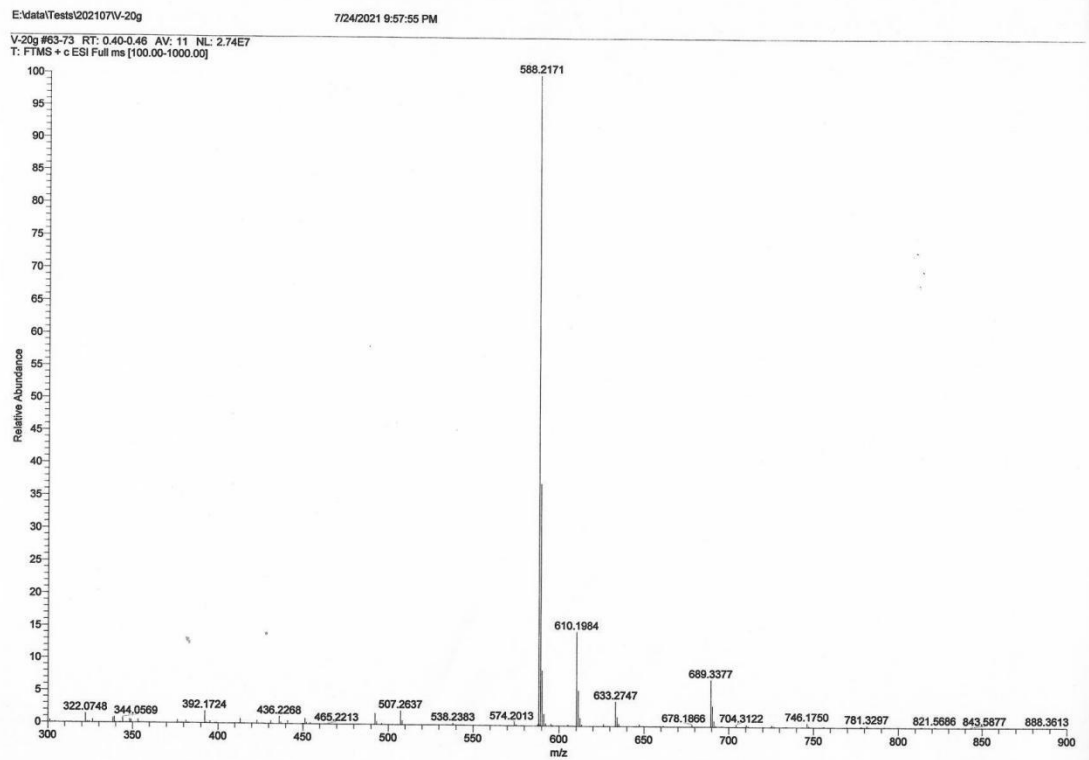

Fig. 87: HRMS spectrum of V-25g

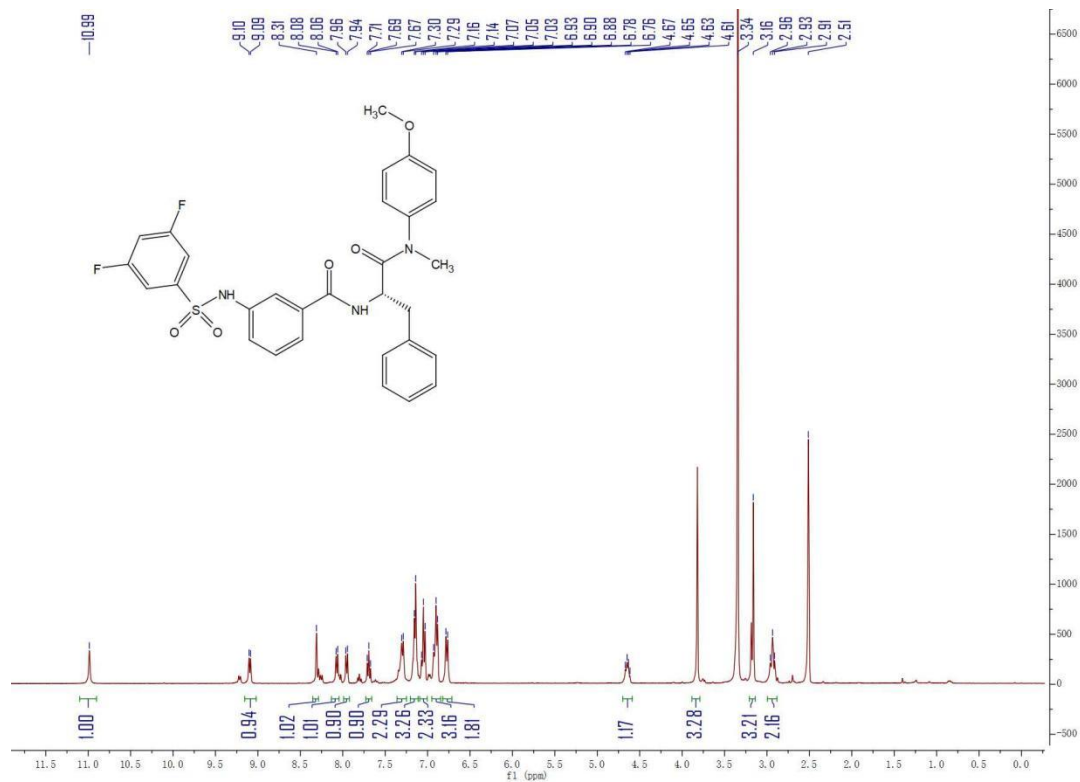

Fig. 88: <sup>1</sup>H NMR spectrum of V-25h

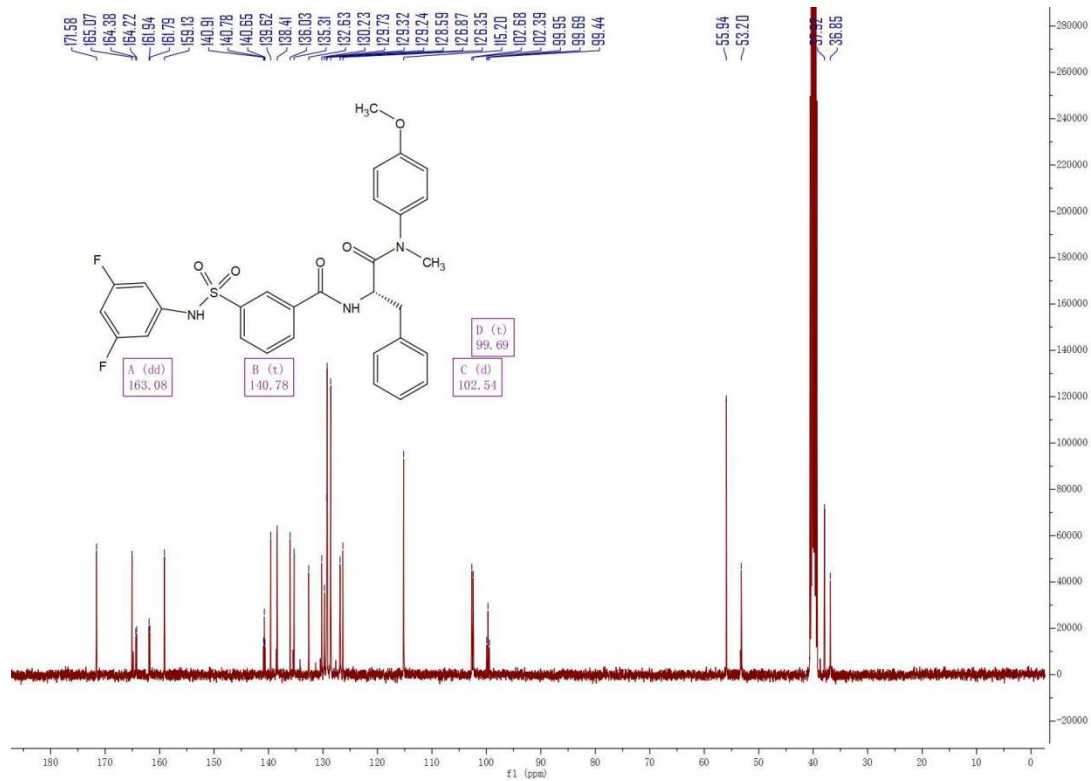

Fig. 89:  $^{13}\text{C}$  NMR spectrum of V-25h

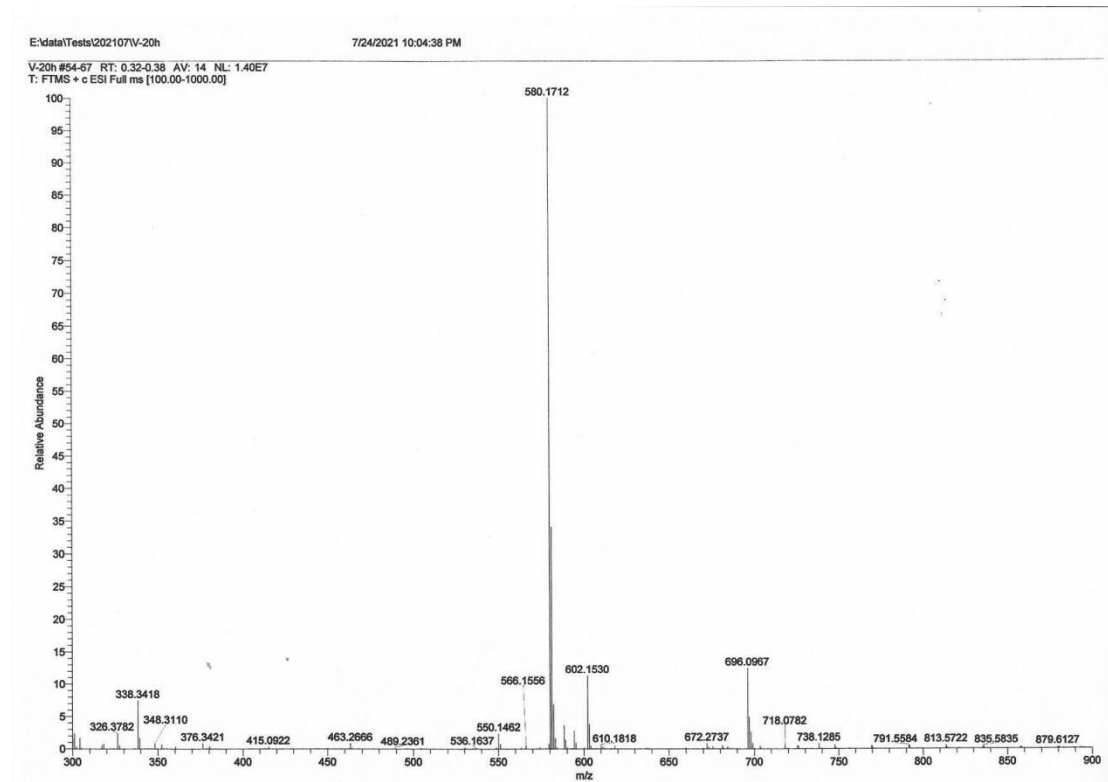

Fig. 90: HRMS spectrum of V-25h

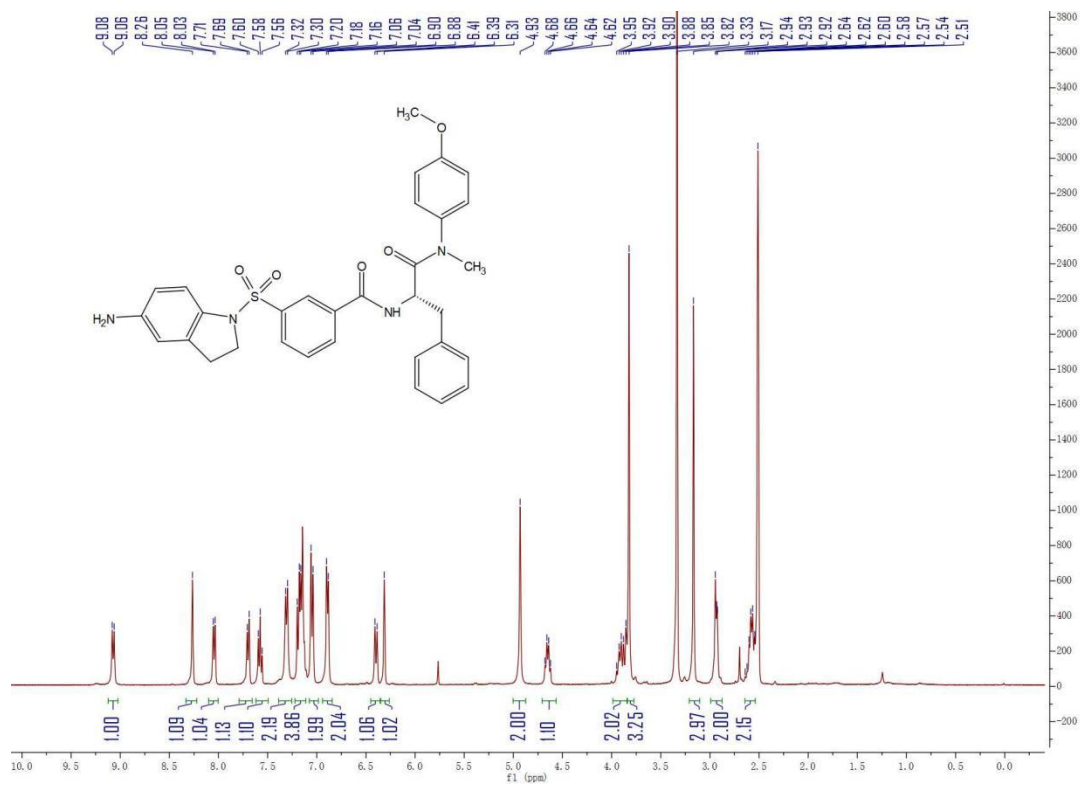

Fig. 90:  $^1\text{H}$  NMR spectrum of V-25i

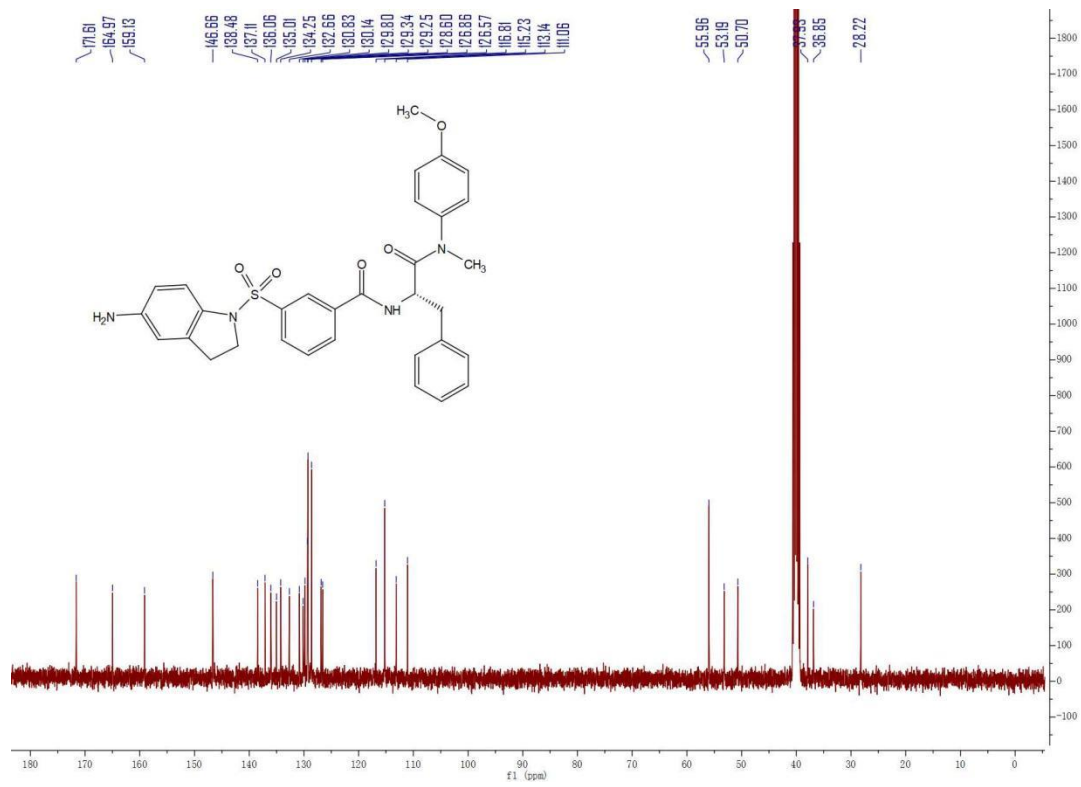

Fig. 91:  $^{13}\text{C}$  NMR spectrum of V-25i

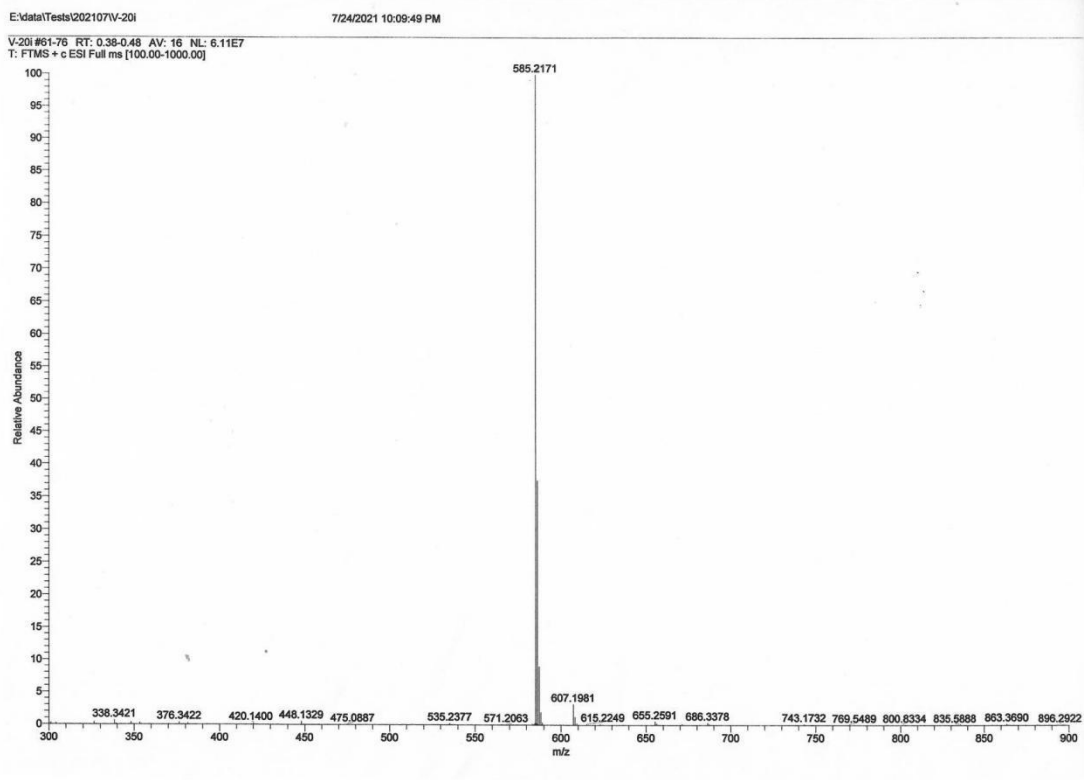

Fig. 92: HRMS spectrum of V-25i

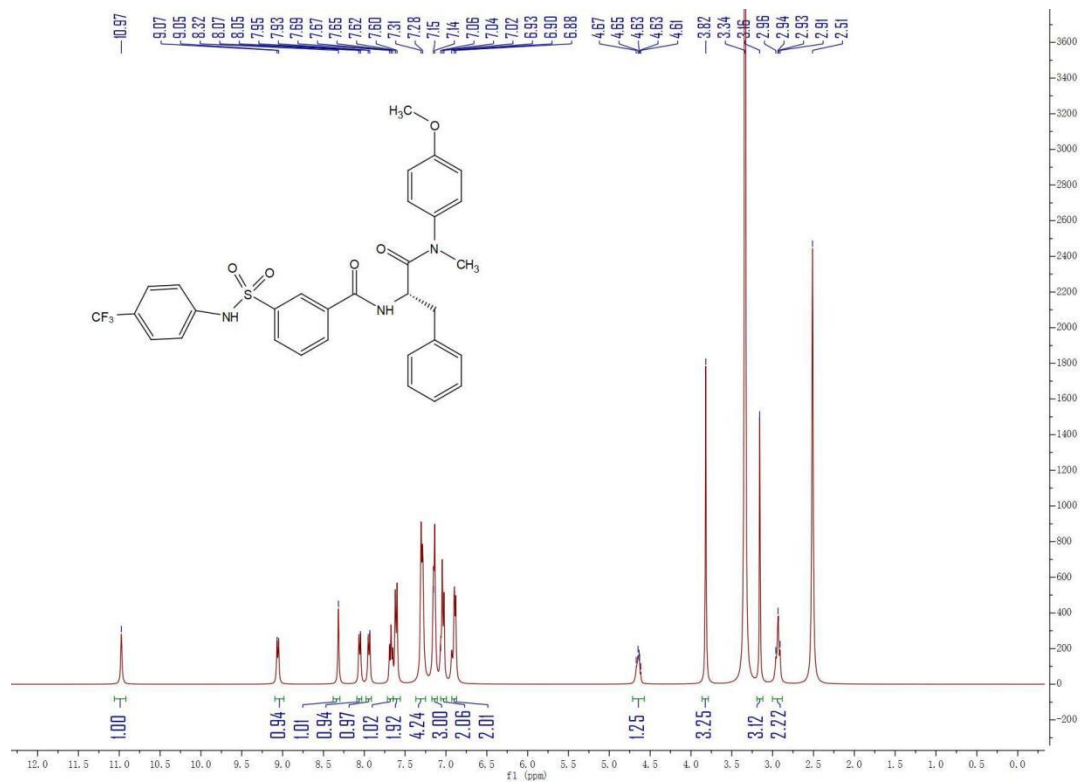

Fig. 93: <sup>1</sup>H NMR spectrum of V-20j

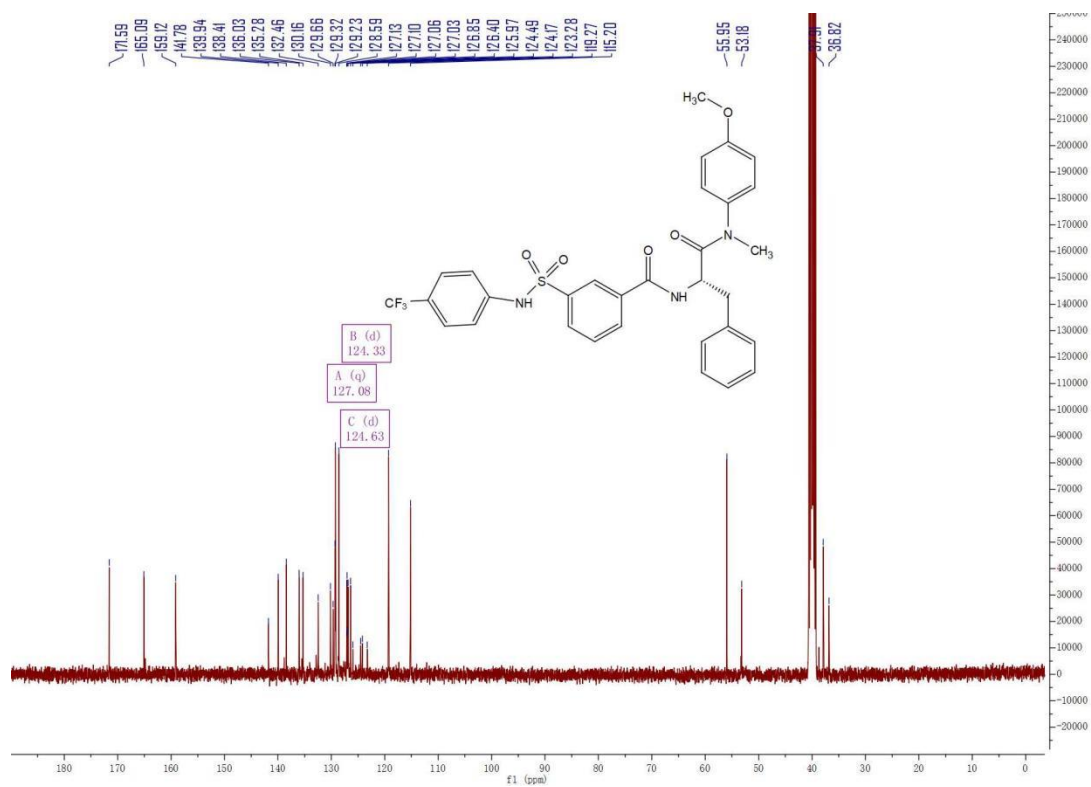

**Fig. 94:**  $^{13}\text{C}$  NMR spectrum of V-20j
