# Supplementary material
Source: PubMed Central journal article supplement (PMC9127657)
Supplement: NIHMS1799873-supplement-Supplementary_3.pdf [file NIHMS1799873-supplement-Supplementary_3.pdf]

Report date: Jan. 6, 2020

Samples received on: 12/11, 2019

From: Drs. K. H. Lee; ZP

Anti-HIV assay: NL4-3-nanoluc-sec

| Compounds | IC <sub>50</sub> : ug/ml<br>Mean +/-<br>SD, n=3 | CC <sub>50</sub> : ug/ml<br>MT4 | Compounds | IC <sub>50</sub> : ug/ml<br>Mean +/- SD,<br>n=3 | CC <sub>50</sub> : ug/ml<br>MT4 |
|-----------|-------------------------------------------------|---------------------------------|-----------|-------------------------------------------------|---------------------------------|
| XYa-1     | >5                                              | >5                              | XYc-9     | >5                                              | >5                              |
| XYa-2     | >5                                              | >5                              | XYc-10    | >5                                              | >5                              |
| XYa-3     | >5                                              | >5                              | XYd-1     | >5                                              | >5                              |
| XYa-4     | >5                                              | >5                              | XYd-2     | >5                                              | >5                              |
| XYa-5     | >5                                              | >5                              | XYd-3     | >5                                              | >5                              |
| XYa-6     | >5                                              | >5                              | XYd-4     | >5                                              | >5                              |
| XYb-1     | >5                                              | >5                              | XYd-5     | >5                                              | >5                              |
| XYb-2     | 4.3 +/- 1.3                                     | >5                              | XYd-6     | Not found in the shipment                       |                                 |
| XYb-3     | 2.6 +/- 0.82                                    | >5                              | XYd-7     | >5                                              | >5                              |
| XYb-4     | 2.8 +/- 0.79                                    | >5                              | XYd-8     | >5                                              | >5                              |
| XYb-5     | 2.9 +/- 0.65                                    | >5                              | XYd-9     | >5                                              | >5                              |
| XYb-6     | >5                                              | >5                              | XYd-10    | *-                                              |                                 |
| XYb-7     | >5                                              | >5                              | XYe-1     | >5                                              | >5                              |
| XYb-8     | >5                                              | >5                              | XYe-2     | 4.1 +/- 1.4                                     | >5                              |
| XYb-9     | 3.1 +/- 0.97                                    | >5                              | XYe-3     | >5                                              | >5                              |
| XYb-10    | >5                                              | >5                              | XYe-4     | 2.7 +/- 0.85                                    | >5                              |
| XYb-11    | >5                                              | >5                              | XYe-5     | >5                                              | >5                              |
| XYb-12    | 1.5 +/- 0.46                                    | >5                              | XYe-6     | >5                                              | >5                              |
| XYc-1     | >5                                              | >5                              | XYe-7     | >5                                              | >5                              |
| XYc-2     | >5                                              | >5                              | XYe-8     | >5                                              | >5                              |
| XYc-3     | >5                                              | >5                              | XYe-9     | Not found in the shipment                       |                                 |
| XYc-4     | >5                                              | >5                              | XYe-10    | >5                                              | >5                              |
| XYc-5     | >5                                              | >5                              | XY2-1     | *-                                              |                                 |
| XYc-6     | >5                                              | >5                              | XY2-2     | 0.57 +/- 0.22                                   | 3.1 +/- 0.28                    |
| XYc-7     | >5                                              | >5                              |           |                                                 |                                 |
| XYc-8     | >5                                              | >5                              | PF-74     | 0.18 +/- 0.047                                  | >5                              |

1. The highest concentration tested for the ZP compounds was 5 ug/ml.
2. CC<sub>50</sub>: 50% cytotoxic concentration.
3. IC<sub>50</sub>: 50% HIV inhibitory concentration.
4. \* -: no selective anti-HIV activity (CC<sub>50</sub>/IC<sub>50</sub> < 5).

**Report date:** Jan. 6, 2020  
Samples received on: 12/11, 2019  
From: Drs. K. H. Lee  
Anti-HIV assay: NL4-3-nanoluc-sec

| Compounds | IC <sub>50</sub> : ug/ml<br>One test | CC <sub>50</sub> : ug/ml<br>MT4 |
|-----------|--------------------------------------|---------------------------------|
| 3-AZC     | >1                                   | >1                              |
| 3-AZU     | >1                                   | >1                              |
| 4-AZC     | >1                                   | >1                              |
| 4-AZU     | >1                                   | >1                              |
| 5-AZC     | >1                                   | >1                              |
| 5-AZU     | >1                                   | >1                              |
| AZC       | >1                                   | >1                              |
| AZU       | >1                                   | >1                              |
| AZT       | 0.0043                               | >0.1                            |

1. The highest concentration tested for the AZC/U compounds was 1 ug/ml.
2. CC<sub>50</sub>: 50% cytotoxic concentration.
3. IC<sub>50</sub>: 50% HIV inhibitory concentration.
4. \* -: no selective anti-HIV activity (CC<sub>50</sub>/IC<sub>50</sub> < 5).
